# Supplementary material for: Prevalence and factors associated with asymptomatic gonococcal and chlamydial infection among US Navy and Marine Corps men infected with the HIV: a cohort study
Source: PubMed Central journal article supplement — BMJ Open. 2013 May 15;3(5):e002775. doi: 10.1136/bmjopen-2013-002775 (PMC3657657; doi:10.1136/bmjopen-2013-002775), 2013-05-15
Supplement: bmjopen-2013-002775.draft_revisions.pdf [file bmjopen-2013-002775.draft_revisions.pdf]

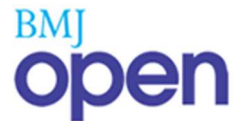

**Prevalence and Factors Associated with Asymptomatic  
Gonococcal and Chlamydial Infection among US Military Men  
Infected With the Human Immunodeficiency Virus**

|                                    |                                                                                                                                                                                                                                                                                                                                                                                                                                                                                                                                                                                                                                                                                                                                                                                                                                                      |
|------------------------------------|------------------------------------------------------------------------------------------------------------------------------------------------------------------------------------------------------------------------------------------------------------------------------------------------------------------------------------------------------------------------------------------------------------------------------------------------------------------------------------------------------------------------------------------------------------------------------------------------------------------------------------------------------------------------------------------------------------------------------------------------------------------------------------------------------------------------------------------------------|
| Journal:                           | <i>BMJ Open</i>                                                                                                                                                                                                                                                                                                                                                                                                                                                                                                                                                                                                                                                                                                                                                                                                                                      |
| Manuscript ID:                     | bmjopen-2013-002775                                                                                                                                                                                                                                                                                                                                                                                                                                                                                                                                                                                                                                                                                                                                                                                                                                  |
| Article Type:                      | Research                                                                                                                                                                                                                                                                                                                                                                                                                                                                                                                                                                                                                                                                                                                                                                                                                                             |
| Date Submitted by the Author:      | 22-Feb-2013                                                                                                                                                                                                                                                                                                                                                                                                                                                                                                                                                                                                                                                                                                                                                                                                                                          |
| Complete List of Authors:          | Carpenter, Robert; Naval Medical Center San Diego, Infectious Diseases<br>Refugio, Oliver; San Diego State University, Graduate School of Public Health<br>Adams, Nehkonti; Naval Medical Center San Diego, Infectious Diseases<br>O'Brien, Kevin; Naval Medical Center San Diego, Infectious Diseases<br>Johnson, Mark; Naval Medical Center San Diego, Infectious Diseases<br>Groff, Harold; Naval Medical Center San Diego, Infectious Diseases<br>Maves, Ryan; Naval Medical Center San Diego, Infectious Diseases<br>Bavaro, Mary; Naval Medical Center San Diego, Infectious Diseases;<br>Uniformed Services University of the Health Sciences, Infectious Disease<br>Clinical Research Program<br>Crum-Cianflone, Nancy; Naval Medical Center San Diego, Infectious<br>Diseases; San Diego State University, Graduate School of Public Health |
| <b>Primary Subject<br>Heading</b>: | Infectious diseases                                                                                                                                                                                                                                                                                                                                                                                                                                                                                                                                                                                                                                                                                                                                                                                                                                  |
| Secondary Subject Heading:         | Sexual health                                                                                                                                                                                                                                                                                                                                                                                                                                                                                                                                                                                                                                                                                                                                                                                                                                        |
| Keywords:                          | HIV & AIDS < INFECTIOUS DISEASES, Molecular diagnostics <<br>INFECTIOUS DISEASES, gonorrhoea, chlamydia, DADT, MSM                                                                                                                                                                                                                                                                                                                                                                                                                                                                                                                                                                                                                                                                                                                                   |
|                                    |                                                                                                                                                                                                                                                                                                                                                                                                                                                                                                                                                                                                                                                                                                                                                                                                                                                      |

SCHOLARONE™  
Manuscripts

**Title: Prevalence and Factors Associated with Asymptomatic Gonococcal and Chlamydial Infection among US Military Men Infected With the Human Immunodeficiency Virus**

**Running Title: HIV and gonococcal/chlamydial infection in US military members**

**Authors:**

1. Robert J. Carpenter, DO, FACP (**corresponding author**)
  - a. Affiliation: Division of Infectious Diseases, Naval Medical Center San Diego
  - b. Position: Infectious Diseases Staff Physician
  - c. Address: 34800 Bob Wilson Drive, San Diego, CA, 92134
  - d. Phone: 619-532-7475
  - e. Fax: 619-532-7478
  - f. Email: rjc311@gmail.com
2. Oliver N. Refugio, MPH
  - a. Affiliation: Graduate School of Public Health, San Diego State University, San Diego, CA
3. Nehkonti Adams, MD
  - a. Affiliation: Division of Infectious Diseases, Naval Medical Center San Diego, San Diego, CA
4. Kevin P. O'Brien
  - a. Affiliation: Division of Infectious Diseases, Naval Medical Center San Diego, San Diego, CA
5. Mark D. Johnson, MD MTM&H
  - a. Affiliation: Division of Infectious Diseases, Naval Medical Center San Diego, San Diego, CA
6. Harold L. Groff, MD MPH
  - a. Affiliation: Division of Infectious Diseases, Naval Medical Center San Diego, San Diego, CA
7. Ryan C. Maves, MD
  - a. Affiliation: Division of Infectious Diseases, Naval Medical Center San Diego, San Diego, CA
8. Mary F. Bavaro, MD
  - a. Affiliation: Division of Infectious Diseases, Naval Medical Center San Diego, San Diego, CA
9. Nancy F. Crum-Cianflone, MD MPH
  - a. Affiliation: Division of Infectious Diseases, Naval Medical Center San Diego, San Diego, CA; Graduate School of Public Health, San Diego State University, San Diego, CA; Naval Health Research Center, San Diego, CA

**Word Count: 1914**

**Conflict of Interest:** There are no conflicts of interest to report. The authors have received no financial support for this manuscript.

**Key words:** HIV, gonorrhoea, Chlamydia, military, MSM, "don't ask, don't tell", DADT

**Disclosure:** The views expressed in this manuscript are those of the authors and do not necessarily reflect the official policy or position of the Department of the Navy, Department of Defense, nor the U.S. Government.

## ARTICLE SUMMARY

### FOCUS

- Is asymptomatic gonorrhoea and chlamydia infection prevalent among US military men?
- If so, are those infections associated with any specific sexual practice or relationship beliefs?

### KEY MESSAGES

- Men who have sex with men (MSM) in the US military are at risk for asymptomatic gonorrhoea and chlamydia infection, predominantly at extragenital sites.
- Sex with men, anal sex, non-Caucasian ethnicity, age <35 years, and HIV infection for <3 years were all associated with asymptomatic infection.
- Repeal of DADT fostered a change in US military medical culture, allowing clinicians to counsel and screen MSM according to established guidelines.

### STRENGTHS

- First comprehensive data set of asymptomatic gonorrhoea/chlamydia infection in a US military population
- First study to describe health needs of men who have sex with men in a US military population

### WEAKNESSES

- Observational study
- Small n (pilot study)
- Inability to obtain 3 site anatomic screening from all participants

**ABSTRACT:**

Objectives: *Neisseria gonorrhoeae* (GC) and *Chlamydia trachomatis* (CT) can facilitate transmission of HIV, and men who have sex with men (MSM) may harbor infections at extragenital sites. Data regarding GC and CT in military populations are lacking. We examined the prevalence and factors associated with asymptomatic GC and CT infection among HIV-infected US military personnel in California.

Methods: Cross-sectional study of asymptomatic men who underwent nucleic acid amplification screening for GC and CT of the pharynx, rectum, and urine. Data on demographics, sexual practices, and HIV variables were collected. Factors associated with infection were analyzed using chi-square tests.

Results: Ninety-nine HIV-positive men were evaluated - 79% MSM, mean age 31 years, 36% Black, and 33% married. Twenty-four percent were infected with either GC or CT. Rectal swabs were positive in 18% for CT and 3% for GC; pharynx swabs were positive in 8% for GC and 2% for CT. Only 1 infection was detected in urine (GC). Anal sex ( $p=0.04$ ), male partner (OR 7.02,  $p=0.04$ ), and sex at least once weekly (OR 3.28,  $p=0.04$ ) were associated with infection. Associated demographic included age <35 years (OR 6.27,  $p=0.02$ ), non-Caucasian ethnicity ( $p=0.03$ ), <3 years since HIV diagnosis (OR 2.75,  $p=0.04$ ), and previous STI (OR 5.10,  $p=0.001$ ).

Conclusions: We found a high prevalence of extragenital GC/CT infection among HIV-infected military men. Only one infection was detected in the urine, signaling the need for aggressive three site screening of MSM. Clinicians should be aware of high prevalence in order to enhance health through comprehensive STI screening practices.

## INTRODUCTION

*Neisseria gonorrhoeae* (GC) and *Chlamydia trachomatis* (CT) cause infection in the male urethral, pharyngeal, and rectal mucosa, facilitating transmission of the human immunodeficiency virus (HIV).[1-3] Men who have sex with men (MSM) are at particular risk for harboring these infections at extragenital sites.[4] The United States (US) law, 'don't ask, don't tell' (DADT), allowed gay persons to serve in the military but made it unlawful to reveal his/her sexual orientation and was the cause of separation of nearly 14,000 qualified service members.[5] Although there are several published reports regarding GC/CT infections in MSM, little data exist among US military members.[6-12] This dearth of data is largely a byproduct of DADT which prohibited the recognition and study of MSM health needs; the law was repealed in 2011.

The Naval Medical Center San Diego (NMCS) is one of three US Navy HIV Evaluation and Treatment Units and provides health care to approximately 575 HIV-infected Department of Defense beneficiaries, approximately half of whom are currently serving on active military duty. Services offered include comprehensive primary and subspecialty health care, mental health services, prevention counseling and health promotion, and HIV and other sexually transmitted infection (STI) screening and management.[13] However, asymptomatic GC/CT screening was not routinely performed in any US Navy medical treatment facility prior to this study. As US Department of Defense beneficiaries, these patients receive open, unrestricted access to care without copayments.

Given the lack of data on asymptomatic GC and CT infection among a US military cohort of HIV-infected men, we conducted a cross-sectional pilot study with the objectives: (1) to describe the prevalence of asymptomatic urethral, pharyngeal, and rectal GC/CT infection in

1 this population; (2) to describe sexual behaviors, relationship attitudes, and HIV disease  
2  
3 attributes among this cohort; and (3) to identify specific factors associated with asymptomatic  
4  
5 GC/CT infection.  
6  
7  
8  
9  
10  
11  
12  
13  
14  
15  
16  
17  
18  
19  
20  
21  
22  
23  
24  
25  
26  
27  
28  
29  
30  
31  
32  
33  
34  
35  
36  
37  
38  
39  
40  
41  
42  
43  
44  
45  
46  
47  
48  
49  
50  
51  
52  
53  
54  
55  
56  
57  
58  
59  
60

For peer review only

## MATERIALS AND METHODS

### Participants and Procedures

All HIV-infected US Navy and Marine Corps members serving on active duty are required to participate in a biannual medical and psychosocial evaluation. Those serving at military bases in the western US and Pacific Basin report to NMCS D for these visits. In order to minimize selection bias, beginning in September 2010, we presented the study to each consecutive military member presenting for required HIV evaluation until we enrolled 100 participants. The study was designed as a pilot to guide design of future research, specifically to establish power calculations required for a full-scale study. No incentive to participation was offered. Those who participated did so to optimize personal sexual health through more thorough STI screening. Inclusion criteria included: male gender, HIV-infected, receiving care at the NMCS D, and having no symptoms referable to the pharynx, urethra, or rectum. Those who voluntarily agreed to participate completed a short questionnaire regarding sexual practices and relationship attitudes. In order to encourage honest responses, the written questionnaire was administered by the clinic's non-military preventive medicine counselor and all responses were confidentially maintained.

Each participant was screened for asymptomatic GC/CT infection of the urethra, pharynx, and rectum using a first-void urine sample and posterior pharyngeal and rectal swabs obtained by their primary HIV provider during their routine, biannual HIV clinic visit. All prevalent infections were appropriately treated. The NMCS D laboratory previously verified the APTIMA Combo2<sup>®</sup> Assay (Gen-Probe Inc., San Diego, CA) for use in the pharynx and rectum according to Clinical Laboratory Improvement Amendments (CLIA) standards.

Medical records were reviewed by an HIV clinician and data regarding demographics, prior STIs, and HIV-related data were collected. The study was approved and waiver of informed consent was granted by the NMCS D Institutional Review Board.

## Data Analysis

The data collected (laboratory results, questionnaire responses, and medical record information) were entered into a Microsoft Excel 2003 (Microsoft Corporation, Redmond, WA) database and analyzed with SAS<sup>®</sup> version 9.2 (SAS Institute, Cary, NC). Prevalence rates were calculated for each type of infection (GC, CT, or both) at each site. The descriptive statistics included for categorical variables were counts and proportions, and means and standard deviations for continuous variables. Chi-square or Fisher's exact tests were performed, as appropriate, to analyze the bivariate relationships between the factors of interest and the outcome defined as being positive for either infection (GC and/or CT in at least one site). Odds ratios (OR), 95% confidence intervals (CI), and *P*-values were reported. *P*-values less than 0.05 were considered statistically significant.



## RESULTS

1  
2  
3 One hundred six consecutive patients were offered participation in the study, six declined,  
4  
5 and one hundred were enrolled. One participant was later excluded due to recent treatment  
6  
7 of asymptomatic rectal CT infection prior to enrollment. Due to scheduling conflicts and  
8  
9 inability of participant to return to the clinic, and despite several attempts to do so, a urine  
10  
11 specimen was not collected from 3 participants and rectal/pharyngeal swabs from 12. The  
12  
13 cohort (n=99) included 79% who were MSM. The mean age of the cohort was 31 years, and  
14  
15 race was self-reported as Black in 36%, Caucasian in 35%, Hispanic in 15%, and other in  
16  
17 13%. Sixty-seven percent were unmarried, and 36% had a previous history of STI. HIV-  
18  
19 related characteristics included a mean CD4 count of 609 cells/mm<sup>3</sup>, 43% had an HIV viral  
20  
21 load <48 copies/μL, 51% were receiving antiretroviral therapy, and the mean time since HIV  
22  
23 diagnosis was 63 months. (Table 1)  
24  
25  
26  
27  
28  
29  
30

31  
32 Twenty-four percent had either GC or CT in at least 1 site. The site with the highest  
33  
34 prevalence was the rectum (18.4%), followed by the pharynx (9.2%) and the urethra (1%). Of  
35  
36 rectal swabs, 18% were positive for CT and 3% for GC. Of pharynx swabs, 8% were positive  
37  
38 for GC and 2% for CT. Only one infection was detected in urine (GC). (Table 2, Figure 1)  
39  
40 Eighty-one percent of those with GC/CT infection had a positive screening test at only one  
41  
42 site, 19% were positive at two sites, and none were positive at all three sites.  
43  
44  
45  
46

47  
48 In bivariate analysis, anal sex (p=0.04), having a male partner (OR 7.02, p=0.04), and having  
49  
50 sex at least once weekly (OR 3.28, p=0.04) were associated with infection; vaginal sex was  
51  
52 protective (OR 0.20, p=0.03). Demographic factors associated with infection included age  
53  
54 <35 years (OR 6.27, p=0.02), non-Caucasian ethnicity (Black OR 5.50, p=0.04; Hispanic OR  
55  
56 11.00, p=0.01; other race OR 7.33, p=0.03), <3 years since HIV diagnosis (OR 2.75, p=0.04),  
57  
58 and previous STI (OR 5.10, p=0.001). (Table 3, 4)  
59  
60

1  
2  
3 Only about half of participants reported always using condoms during anal sex, and less than  
4  
5 half always required their partner to use condoms during anal sex. During oral sex, less than  
6  
7 15% of participants reported always using condoms and always requiring their partner to use  
8  
9 condoms. (Table 4)  
10

11  
12  
13  
14 With regards to relationship attitudes, 52% of participants reported sexual relations only with  
15  
16 a partner in a serious relationship, while 28% disagreed with this statement. Seventy-six  
17  
18 percent of participants expected monogamy in a serious relationship, while 14% disagreed  
19  
20 with this statement. Twenty-three percent of participants participated in most of their sexual  
21  
22 relations with casual friends and 53% disagreed with this statement. None of these beliefs  
23  
24 were significantly associated with infection. (Table 4)  
25  
26  
27  
28  
29  
30  
31  
32  
33  
34  
35  
36  
37  
38  
39  
40  
41  
42  
43  
44  
45  
46  
47  
48  
49  
50  
51  
52  
53  
54  
55  
56  
57  
58  
59  
60

## DISCUSSION

We found an alarming prevalence of GC/CT infection—nearly twice that of non-military MSM in other large California cities.[7] In fact, our prevalence may represent an underestimate, since some of our patients may have sought screening (and subsequent therapy) at the local county STD clinic prior to their military encounter, due to fear of discipline or discharge.[14 15] We believe there are two important contributors to the high prevalence rates observed: DADT and the first-screen effect.

DADT likely contributed the most to undiagnosed infection. The American Medical Association posited that this military law compromised the medical care of gay patients serving in the military.[16] Prior to repeal, military healthcare providers often believed they could not ask, document, nor counsel about sexual behaviors or orientations for fear of revealing MSM practices of their patients that they believed would lead to adverse legal action. Therefore, risk would not have been assessed and the need for screening was unknown and did not occur. DADT also prevented patients from providing honest answers or reports of sexual practices, again for fear of adverse legal action. We started our study prior to the repeal because SECNAVINST 5300.30D (the document that governs management of HIV infection in the Navy and Marine Corps) offered protection against adverse action related to information obtained from a medical or epidemiologic interview. Unfortunately, this provision was not well known to military healthcare providers.

Second, our study facilitated the initiation of sexual risk driven screening for GC/CT infection in our healthcare facility. Hence, study data represent the first time many participants were screened for GC/CT infection. First-time screening for a condition may reveal more prevalent cases than subsequent screening, especially in the case of asymptomatic infection, and may

1 partially explain why we detected higher prevalence than that found in other California cities  
2 which may represent subsequent screening data.  
3  
4  
5  
6

7 Our study also had several important findings regarding HIV-positive men serving in the US  
8 military. With regards to sexual practices, most respondents were MSM and engaged in oral,  
9 anal (receptive and insertive), and oral-anal sex. As expected, most respondents do not use  
10 condoms during oral sex. Surprisingly though was that nearly half of respondents do not  
11 always use condoms or require their partners to use condoms during anal sex. Safer sex  
12 fatigue, serosorting, and seropositioning may be contributors to low rates of condom use.[17]  
13  
14  
15  
16  
17  
18  
19  
20  
21 Regarding relationship attitudes, about half of respondents believe sexual relations should  
22 only occur with partners in a serious relationship while approximately one-quarter engage in  
23 sex with casual friends. When in a serious relationship, the majority of respondents expect  
24 monogamy.  
25  
26  
27  
28  
29  
30  
31  
32

33 The significant findings noted in our study were not unexpected, however, have not  
34 previously been studied or reported in this population. MSM, anal sex, non-Caucasian  
35 ethnicity, and younger age were associated with GC/CT and have been identified as STI risk  
36 factors in other studies.[18-21] Also, it follows that a person who recently acquired HIV  
37 infection or has a history of STI would be at higher risk for GC/CT infection. The increased  
38 risk among non-Caucasians may be related to cultural or societal stigma which may prevent  
39 an individual from seeking screening services (and need to disclose self-perceived taboo  
40 sexual behavior) in a way that DADT likely prevented military MSM from seeking or receiving  
41 appropriate screening.  
42  
43  
44  
45  
46  
47  
48  
49  
50  
51  
52  
53  
54  
55  
56

57 We acknowledge potential limitations of our study: those inherent to an observational design,  
58 inability to achieve 100% three site screening from all participants, and small study  
59  
60

1 population. Although our sample size is small, it is worth noting that trends in our data are  
2 similar to trends noted in larger non-military studies of GC/CT infection: most infections were  
3 detected at extragenital sites, the majority of rectal infections were due to CT, and the  
4 majority of pharyngeal infections were due to GC. Finally, there may have been some  
5 reluctance of participants to answer survey questions honestly, although we believe this was  
6 minimized by our confidential survey procedures and as reflected by candid responses we  
7 did receive.  
8  
9

10 We have generated the first comprehensive data set of asymptomatic GC/CT infection in a  
11 US military population. Although much of what we have learned was assumed to be true, this  
12 is the first systematic description and underscores the need for military healthcare providers  
13 to screen their MSM population for infection at three anatomic sites. Also, as noted in larger  
14 studies, we found that reliance on urine/urethral screening alone will fail to detect the vast  
15 majority of asymptomatic infections in an MSM population. Finally, low rates of reported  
16 condom use among HIV-positive participants signals the need to enhance safer sex  
17 prevention efforts among MSM.  
18  
19  
20  
21  
22  
23  
24  
25  
26  
27  
28  
29  
30  
31  
32  
33  
34  
35  
36  
37  
38  
39  
40  
41  
42  
43  
44  
45  
46  
47  
48  
49  
50  
51  
52  
53  
54  
55  
56  
57  
58  
59  
60

## TABLES

Table 1. HIV-infected male demographic characteristics, 2011—San Diego, California (n=99)

| <b>HIV variables</b>                       |             |
|--------------------------------------------|-------------|
| CD4 count mean (SD), cells/mm <sup>3</sup> | 609 (216)   |
| Suppressed HIV VL (<48 copies/μL)          | 43%         |
| Receiving ART                              | 51%         |
| Time since HIV diagnosis mean (SD), months | 62.8 (59.9) |
| <b>Demographic variables</b>               |             |
| Age                                        |             |
| Mean (SD), years                           | 30.9 (8.2)  |
| <25 years                                  | 28%         |
| 25-34 years                                | 38%         |
| ≥ 35 years                                 | 33%         |
| Ethnicity                                  |             |
| Black                                      | 36%         |
| Caucasian                                  | 35%         |
| Hispanic                                   | 15%         |
| Other                                      | 13%         |
| Marital Status                             |             |
| Married                                    | 33%         |
| Single                                     | 67%         |
| Sexual Practice                            |             |
| MSM                                        | 79%         |
| MSW                                        | 21%         |
| Previous STI                               |             |
| Yes                                        | 36%         |

VL = plasma viral load

ART = antiretroviral therapy

MSM = men who have sex with men

MSW = men who have sex with women

SD = standard deviation

STI = sexually transmitted infection

Table 2. Prevalence of asymptomatic infection by anatomic site, HIV-infected men, 2011—San Diego, California (n=99)\*

|         | Either Infection |    |            | CT    |    |            | GC    |    |            |
|---------|------------------|----|------------|-------|----|------------|-------|----|------------|
|         | Cases            | N  | Prevalence | Cases | N  | Prevalence | Cases | N  | Prevalence |
|         |                  |    | Rate       |       |    | Rate       |       |    | Rate       |
| Overall | 20               | 83 | 24.1%      | 17    | 83 | 20.5%      | 8     | 83 | 9.6%       |
| Urethra | 1                | 96 | 1.0%       | 0     | 96 | 0.0%       | 1     | 96 | 1.0%       |
| Rectum  | 16               | 87 | 18.4%      | 16    | 87 | 18.4%      | 3     | 87 | 3.4%       |
| Pharynx | 8                | 87 | 9.2%       | 2     | 87 | 2.3%       | 7     | 87 | 8.0%       |

\*Some participants did not have screening at all three sites.

Table 3. Survey responses – demographic &amp; sexual practices by infection status, HIV-infected men, 2011—San Diego, California

|                                              | Total |        | CT and/or GC Infection |        | Neither infection |        | OR    | 95% CI      | p value <sup>a</sup> |
|----------------------------------------------|-------|--------|------------------------|--------|-------------------|--------|-------|-------------|----------------------|
|                                              | n     | (%)    | n                      | (%)    | n                 | (%)    |       |             |                      |
| <b>Demographic variables (N respondents)</b> |       |        |                        |        |                   |        |       |             |                      |
| Gender of sexual partner(s) (N=98)           |       |        |                        |        |                   |        |       |             |                      |
| Women only                                   | 21    | (21.4) | 1                      | (4.8)  | 20                | (26.0) | REF   | --          | --                   |
| Male (MSM)                                   | 77    | (78.6) | 20                     | (95.2) | 57                | (74.0) | 7.02  | 1.88, 55.72 | 0.04                 |
| Race/ethnicity (N=99)                        |       |        |                        |        |                   |        |       |             |                      |
| White                                        | 35    | (35.4) | 2                      | (9.5)  | 33                | (42.3) | REF   | --          | --                   |
| Black                                        | 36    | (36.4) | 9                      | (42.9) | 27                | (34.7) | 5.50  | 1.10, 27.64 | 0.04                 |
| Hispanic                                     | 15    | (15.2) | 6                      | (28.6) | 9                 | (11.5) | 11.00 | 1.89, 64.06 | 0.01                 |
| Other                                        | 13    | (13.0) | 4                      | (19.0) | 9                 | (11.5) | 7.33  | 1.15, 46.66 | 0.03                 |
| Age (N=99)                                   |       |        |                        |        |                   |        |       |             |                      |
| <35 years                                    | 66    | (66.7) | 19                     | (90.5) | 47                | (60.3) | 6.27  | 1.36, 28.82 | 0.02                 |
| ≥ 35 years                                   | 33    | (33.3) | 2                      | (9.5)  | 31                | (39.7) | REF   | --          | --                   |
| Previous history of STI (N=99)               |       |        |                        |        |                   |        |       |             |                      |
| No                                           | 63    | (63.6) | 7                      | (33.3) | 56                | (71.8) | REF   | --          | --                   |
| Yes                                          | 36    | (36.4) | 14                     | (66.7) | 22                | (28.2) | 5.10  | 1.81, 14.30 | 0.001                |
| Number of years since HIV diagnosis (N=99)   |       |        |                        |        |                   |        |       |             |                      |
| > 3 years                                    | 57    | (57.6) | 8                      | (38.1) | 49                | (62.8) | REF   | --          | --                   |
| ≤ 3 years                                    | 42    | (42.4) | 13                     | (61.9) | 29                | (37.2) | 2.75  | 1.02, 7.41  | 0.04                 |
| <b>Sexual practices (N respondents)</b>      |       |        |                        |        |                   |        |       |             |                      |
| Vaginal sex (N=99)                           |       |        |                        |        |                   |        |       |             |                      |
| No                                           | 70    | (70.7) | 19                     | (90.5) | 51                | (65.4) | REF   | --          | --                   |
| Yes                                          | 29    | (29.3) | 2                      | (9.5)  | 27                | (34.6) | 0.20  | 0.04, 0.92  | 0.03                 |
| Oral sex <sup>b</sup> (N=99)                 |       |        |                        |        |                   |        |       |             |                      |
| No                                           | 3     | (3.0)  | 0                      | (0)    | 3                 | (3.8)  | REF   | --          | --                   |
| Yes                                          | 96    | (97.0) | 21                     | (100)  | 75                | (96.2) | --    | --          | 1.00                 |
| Anal sex <sup>b</sup> (N=99)                 |       |        |                        |        |                   |        |       |             |                      |
| No                                           | 15    | (15.2) | 0                      | (0)    | 15                | (19.2) | REF   | --          | --                   |
| Yes                                          | 84    | (84.8) | 21                     | (100)  | 63                | (80.8) | --    | --          | 0.04                 |
| Insertive anal sex (N=80)                    |       |        |                        |        |                   |        |       |             |                      |
| No                                           | 15    | (18.8) | 5                      | (23.8) | 10                | (16.9) | 1.00  | --          | --                   |
| Yes                                          | 65    | (81.2) | 16                     | (76.2) | 49                | (83.1) | 0.65  | 0.19, 2.20  | 0.52                 |
| Receptive anal sex (N=80)                    |       |        |                        |        |                   |        |       |             |                      |
| No                                           | 17    | (21.3) | 2                      | (9.5)  | 15                | (25.4) | REF   | --          | --                   |
| Yes                                          | 63    | (78.7) | 19                     | (90.5) | 44                | (74.6) | 3.32  | 0.67, 15.57 | 0.21                 |

<sup>a</sup>Fisher's exact test was performed for variables with expected cell frequencies <5, otherwise a Chi-square test was performed.

<sup>b</sup>Odds ratios and 95% confidence intervals not available due to one or more zero cells.

MSM = men who have sex with men (self-reported).

Oral and oral-anal sex were not significantly associated with infection with p>0.05

Table 4. Survey responses – relationship attitudes &amp; condom use by infection status, HIV-infected men, 2011—San Diego, California

|                                                                     | Total |        | CT and/or GC Infection |        | Neither infection |        | OR   | 95% CI      | p value <sup>a</sup> |
|---------------------------------------------------------------------|-------|--------|------------------------|--------|-------------------|--------|------|-------------|----------------------|
|                                                                     | n     | (%)    | n                      | (%)    | n                 | (%)    |      |             |                      |
| <b>Relationship attitudes (N respondents)</b>                       |       |        |                        |        |                   |        |      |             |                      |
| Sexual relationships with >1 partner in the past year (N=99)        |       |        |                        |        |                   |        |      |             |                      |
| No                                                                  | 39    | (39.4) | 5                      | (23.8) | 34                | (43.6) | REF  | --          | --                   |
| Yes                                                                 | 60    | (60.6) | 16                     | (76.2) | 44                | (56.4) | 2.47 | 0.82, 7.42  | 0.10                 |
| Frequency of sexual activity in the past year (N=99)                |       |        |                        |        |                   |        |      |             |                      |
| < Once a week                                                       | 38    | (38.4) | 4                      | (19.0) | 34                | (43.6) | REF  | --          | --                   |
| At least once a week                                                | 61    | (61.6) | 17                     | (81.0) | 44                | (56.4) | 3.28 | 1.01, 10.66 | 0.04                 |
| Sexual relations only with partner in a serious relationship (N=99) |       |        |                        |        |                   |        |      |             |                      |
| Strongly agree                                                      | 51    | (51.5) | 7                      | (33.3) | 44                | (56.4) | REF  | --          | --                   |
| Neither agree/disagree                                              | 20    | (20.2) | 5                      | (23.8) | 15                | (19.2) | 2.10 | 0.59, 7.60  | 0.26                 |
| Strongly disagree                                                   | 28    | (28.3) | 9                      | (42.9) | 19                | (24.4) | 2.98 | 0.97, 9.17  | 0.06                 |
| Expect monogamy in a serious relationship (N=99)                    |       |        |                        |        |                   |        |      |             |                      |
| Strongly agree                                                      | 75    | (75.8) | 14                     | (66.7) | 61                | (78.1) | REF  | --          | --                   |
| Neither agree/disagree                                              | 10    | (10.1) | 3                      | (14.3) | 7                 | (9.0)  | 1.87 | 0.43, 8.14  | 0.41                 |
| Strongly disagree                                                   | 14    | (14.1) | 4                      | (19.0) | 10                | (12.9) | 1.74 | 0.48, 6.38  | 0.40                 |
| Sexual activities mostly with casual friends (N=99)                 |       |        |                        |        |                   |        |      |             |                      |
| Strongly disagree                                                   | 52    | (53.0) | 8                      | (38.0) | 44                | (57.2) | REF  | --          | --                   |
| Neither agree/disagree                                              | 24    | (24.5) | 9                      | (43.0) | 15                | (19.5) | 3.30 | 1.08, 10.10 | 0.04                 |
| Strongly agree                                                      | 22    | (22.5) | 4                      | (19.0) | 18                | (23.3) | 1.22 | 0.33, 4.57  | 0.77                 |
| <b>Condom use (N respondents)</b>                                   |       |        |                        |        |                   |        |      |             |                      |
| Self-condom use during oral sex (N=92)                              |       |        |                        |        |                   |        |      |             |                      |
| Always                                                              | 12    | (13.0) | 4                      | (20.0) | 8                 | (11.1) | REF  | --          | --                   |
| Do not always                                                       | 80    | (87.0) | 16                     | (80.0) | 64                | (88.9) | 0.50 | 0.13, 1.87  | 0.29                 |
| Partner-condom use during oral sex (N=90)                           |       |        |                        |        |                   |        |      |             |                      |
| Always                                                              | 13    | (14.4) | 4                      | (19.0) | 9                 | (13.0) | REF  | --          | --                   |
| Do not always                                                       | 77    | (85.6) | 17                     | (81.0) | 60                | (87.0) | 0.64 | 0.17, 2.34  | 0.49                 |
| Self-condom use during anal sex (N=82)                              |       |        |                        |        |                   |        |      |             |                      |
| Always                                                              | 42    | (51.2) | 9                      | (45.0) | 33                | (53.2) | REF  | --          | --                   |
| Do not always                                                       | 40    | (48.8) | 11                     | (55.0) | 29                | (46.8) | 1.39 | 0.51, 3.83  | 0.52                 |
| Partner-condom use during anal sex (N=80)                           |       |        |                        |        |                   |        |      |             |                      |
| Always                                                              | 37    | (46.2) | 8                      | (38.1) | 29                | (49.2) | REF  | --          | --                   |
| Do not always                                                       | 43    | (53.8) | 13                     | (61.9) | 30                | (50.8) | 1.57 | 0.57, 4.35  | 0.38                 |

<sup>a</sup>Fisher's exact test was performed for variables with expected cell frequencies <5, otherwise a Chi-square test was performed.

<sup>b</sup>Odds ratios and 95% confidence intervals not available due to one or more zero cells.



## LICENSE FOR PUBLICATION STATEMENT

The Corresponding Author has the right to grant on behalf of all authors and does grant on behalf of all authors, an exclusive license (or non-exclusive for government employees) on a worldwide basis to the BMJ Group and co-owners or contracting owning societies (where published by the BMJ Group on their behalf), and its Licensees to permit this article (if accepted) to be published in Sexually Transmitted Infections and any other BMJ Group products and to exploit all subsidiary rights, as set out in our license.

## CONTRIBUTORSHIP STATEMENT

Robert J. Carpenter contributed to conception and design, acquisition of data, and analysis and interpretation of data, participated in drafting the article or revising it critically for important intellectual content, and was involved in final approval of the version to be published.

All other authors listed contributed to acquisition of data, participated in drafting the article or revising it critically for important intellectual content, and were involved in final approval of the version to be published.

## DATA SHARING STATEMENT

No additional data available.

## REFERENCES

1. Cohen MS, Hoffman IF, Royce RA, et al. Reduction of concentration of HIV-1 in semen after treatment of urethritis: implications for prevention of sexual transmission of HIV-1. *AIDSCAP Malawi Research Group. Lancet* 1997;**349**(9069):1868-73.
2. Galvin SR, Cohen MS. The role of sexually transmitted diseases in HIV transmission. *Nature reviews. Microbiology* 2004;**2**(1):33-42.
3. Vernazza PL, Eron JJ, Fiscus SA, et al. Sexual transmission of HIV: infectiousness and prevention. *Aids* 1999;**13**(2):155-66.
4. Workowski KA, Berman S. Sexually transmitted diseases treatment guidelines, 2010. *MMWR Recomm Rep* 2010;**59**(RR-12):1-110.
5. Burrelli DF. "Don't Ask, Don't Tell": The Law and Military Policy on Same-Sex Behavior. Secondary "Don't Ask, Don't Tell": The Law and Military Policy on Same-Sex Behavior 2010. <http://www.fas.org/sgp/crs/misc/R40782.pdf>.
6. Geisler WM, Whittington WL, Suchland RJ, et al. Epidemiology of anorectal chlamydial and gonococcal infections among men having sex with men in Seattle: utilizing serovar and auxotype strain typing. *Sex Transm Dis* 2002;**29**(4):189-95.
7. Kent CK, Chaw JK, Wong W, et al. Prevalence of rectal, urethral, and pharyngeal chlamydia and gonorrhoea detected in 2 clinical settings among men who have sex with men: San Francisco, California, 2003. *Clin Infect Dis* 2005;**41**(1):67-74.
8. Miller WC, Zenilman JM. Epidemiology of chlamydial infection, gonorrhoea, and trichomoniasis in the United States--2005. *Infect Dis Clin North Am* 2005;**19**(2):281-96.
9. Mimiaga MJ, Helms DJ, Reisner SL, et al. Gonococcal, chlamydia, and syphilis infection positivity among MSM attending a large primary care clinic, Boston, 2003 to 2004. *Sex Transm Dis* 2009;**36**(8):507-11.
10. Phipps W, Stanley H, Kohn R, et al. Syphilis, chlamydia, and gonorrhoea screening in HIV-infected patients in primary care, San Francisco, California, 2003. *AIDS Patient Care STDS* 2005;**19**(8):495-8.
11. Rietmeijer CA, Patnaik JL, Judson FN, et al. Increases in gonorrhoea and sexual risk behaviors among men who have sex with men: a 12-year trend analysis at the Denver Metro Health Clinic. *Sex Transm Dis* 2003;**30**(7):562-7.
12. Schachter J, Moncada J, Liska S, et al. Nucleic acid amplification tests in the diagnosis of chlamydial and gonococcal infections of the oropharynx and rectum in men who have sex with men. *Sex Transm Dis* 2008;**35**(7):637-42.
13. Crum NF, Grillo M, Wallace MR. HIV care in the U.S. Navy: a multidisciplinary approach. *Military medicine* 2005;**170**(12):1019-25.
14. Katz KA. Health hazards of "don't ask, don't tell". *N Engl J Med* 2010;**363**(25):2380-1.
15. Smith DM. Active duty military personnel presenting for care at a Gay Men's Health Clinic. *J Homosex* 2008;**54**(3):277-9.
16. O'Reilly KB. AMA meeting: "Don't ask, don't tell" said to hurt patient care; repeal urged. Secondary AMA meeting: "Don't ask, don't tell" said to hurt patient care; repeal urged 2009. <http://www.ama-assn.org/amednews/2009/11/23/prsc1123.htm>.
17. McFarland W, Chen YH, Nguyen B, et al. Behavior, intention or chance? A longitudinal study of HIV seroadaptive behaviors, abstinence and condom use. *AIDS Behav* 2012;**16**(1):121-31.
18. Mustanski BS, Newcomb ME, Du Bois SN, et al. HIV in young men who have sex with men: a review of epidemiology, risk and protective factors, and interventions. *J Sex Res* 2011;**48**(2-3):218-53.
19. Newman LM, Berman SM. Epidemiology of STD disparities in African American communities. *Sex Transm Dis* 2008;**35**(12 Suppl):S4-12.
20. Spaulding AB, Lifson AR, Iverson ER, et al. Gonorrhoea or chlamydia in a U.S. military HIV-positive cohort. *Sex Transm Infect* 2012;**88**(4):266-71.
21. Wolitski RJ, Fenton KA. Sexual health, HIV, and sexually transmitted infections among gay, bisexual, and other men who have sex with men in the United States. *AIDS Behav* 2011;**15** Suppl 1:S9-17.

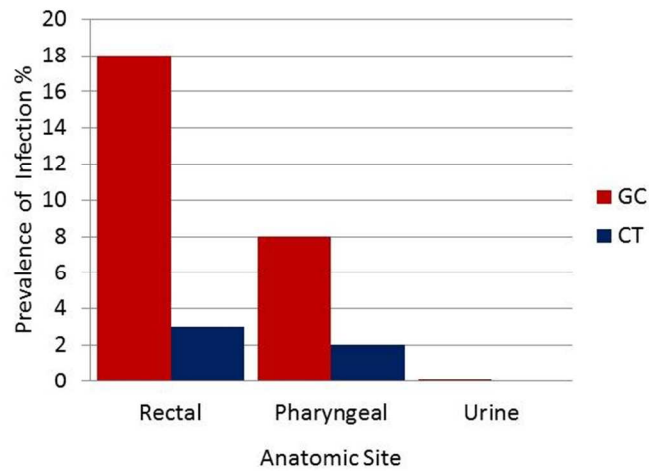

Distribution of asymptomatic gonococcal (GC) and chlamydial (CT) prevalence among HIV-infected men, San Diego, California, 2011  
254x190mm (96 x 96 DPI)

STROBE Statement—Checklist of items that should be included in reports of *cohort studies*

|                              | Item No | Recommendation                                                                                                                                                                                                                                                                                                                                                                                                |
|------------------------------|---------|---------------------------------------------------------------------------------------------------------------------------------------------------------------------------------------------------------------------------------------------------------------------------------------------------------------------------------------------------------------------------------------------------------------|
| <b>Title and abstract</b>    | 1       | (a) Indicate the study's design with a commonly used term in the title or the abstract<br>(b) Provide in the abstract an informative and balanced summary of what was done and what was found                                                                                                                                                                                                                 |
| <b>Introduction</b>          |         |                                                                                                                                                                                                                                                                                                                                                                                                               |
| Background/rationale         | 2       | Explain the scientific background and rationale for the investigation being reported                                                                                                                                                                                                                                                                                                                          |
| Objectives                   | 3       | State specific objectives, including any prespecified hypotheses                                                                                                                                                                                                                                                                                                                                              |
| <b>Methods</b>               |         |                                                                                                                                                                                                                                                                                                                                                                                                               |
| Study design                 | 4       | Present key elements of study design early in the paper                                                                                                                                                                                                                                                                                                                                                       |
| Setting                      | 5       | Describe the setting, locations, and relevant dates, including periods of recruitment, exposure, follow-up, and data collection                                                                                                                                                                                                                                                                               |
| Participants                 | 6       | (a) Give the eligibility criteria, and the sources and methods of selection of participants. Describe methods of follow-up<br>(b) For matched studies, give matching criteria and number of exposed and unexposed                                                                                                                                                                                             |
| Variables                    | 7       | Clearly define all outcomes, exposures, predictors, potential confounders, and effect modifiers. Give diagnostic criteria, if applicable                                                                                                                                                                                                                                                                      |
| Data sources/<br>measurement | 8*      | For each variable of interest, give sources of data and details of methods of assessment (measurement). Describe comparability of assessment methods if there is more than one group                                                                                                                                                                                                                          |
| Bias                         | 9       | Describe any efforts to address potential sources of bias                                                                                                                                                                                                                                                                                                                                                     |
| Study size                   | 10      | Explain how the study size was arrived at                                                                                                                                                                                                                                                                                                                                                                     |
| Quantitative variables       | 11      | Explain how quantitative variables were handled in the analyses. If applicable, describe which groupings were chosen and why                                                                                                                                                                                                                                                                                  |
| Statistical methods          | 12      | (a) Describe all statistical methods, including those used to control for confounding<br>(b) Describe any methods used to examine subgroups and interactions<br>(c) Explain how missing data were addressed<br>(d) If applicable, explain how loss to follow-up was addressed<br>(e) Describe any sensitivity analyses                                                                                        |
| <b>Results</b>               |         |                                                                                                                                                                                                                                                                                                                                                                                                               |
| Participants                 | 13*     | (a) Report numbers of individuals at each stage of study—eg numbers potentially eligible, examined for eligibility, confirmed eligible, included in the study, completing follow-up, and analysed<br>(b) Give reasons for non-participation at each stage<br>(c) Consider use of a flow diagram                                                                                                               |
| Descriptive data             | 14*     | (a) Give characteristics of study participants (eg demographic, clinical, social) and information on exposures and potential confounders<br>(b) Indicate number of participants with missing data for each variable of interest<br>(c) Summarise follow-up time (eg, average and total amount)                                                                                                                |
| Outcome data                 | 15*     | Report numbers of outcome events or summary measures over time                                                                                                                                                                                                                                                                                                                                                |
| Main results                 | 16      | (a) Give unadjusted estimates and, if applicable, confounder-adjusted estimates and their precision (eg, 95% confidence interval). Make clear which confounders were adjusted for and why they were included<br>(b) Report category boundaries when continuous variables were categorized<br>(c) If relevant, consider translating estimates of relative risk into absolute risk for a meaningful time period |

|                          |    |                                                                                                                                                                            |
|--------------------------|----|----------------------------------------------------------------------------------------------------------------------------------------------------------------------------|
| Other analyses           | 17 | Report other analyses done—eg analyses of subgroups and interactions, and sensitivity analyses                                                                             |
| <b>Discussion</b>        |    |                                                                                                                                                                            |
| Key results              | 18 | Summarise key results with reference to study objectives                                                                                                                   |
| Limitations              | 19 | Discuss limitations of the study, taking into account sources of potential bias or imprecision. Discuss both direction and magnitude of any potential bias                 |
| Interpretation           | 20 | Give a cautious overall interpretation of results considering objectives, limitations, multiplicity of analyses, results from similar studies, and other relevant evidence |
| Generalisability         | 21 | Discuss the generalisability (external validity) of the study results                                                                                                      |
| <b>Other information</b> |    |                                                                                                                                                                            |
| Funding                  | 22 | Give the source of funding and the role of the funders for the present study and, if applicable, for the original study on which the present article is based              |

\*Give information separately for exposed and unexposed groups.

**Note:** An Explanation and Elaboration article discusses each checklist item and gives methodological background and published examples of transparent reporting. The STROBE checklist is best used in conjunction with this article (freely available on the Web sites of PLoS Medicine at <http://www.plosmedicine.org/>, Annals of Internal Medicine at <http://www.annals.org/>, and Epidemiology at <http://www.epidem.com/>). Information on the STROBE Initiative is available at <http://www.strobe-statement.org>.



**Incidence and Factors Associated with Asymptomatic  
Gonococcal and Chlamydial Infection among US Navy and  
Marine Corps Men Infected With the Human  
Immunodeficiency Virus**

|                                 |                                                                                                                                                                                                                                                                                                                                                                                                                                                                                                                                                                                                                                                                                                                                                                                                                                             |
|---------------------------------|---------------------------------------------------------------------------------------------------------------------------------------------------------------------------------------------------------------------------------------------------------------------------------------------------------------------------------------------------------------------------------------------------------------------------------------------------------------------------------------------------------------------------------------------------------------------------------------------------------------------------------------------------------------------------------------------------------------------------------------------------------------------------------------------------------------------------------------------|
| Journal:                        | <i>BMJ Open</i>                                                                                                                                                                                                                                                                                                                                                                                                                                                                                                                                                                                                                                                                                                                                                                                                                             |
| Manuscript ID:                  | bmjopen-2013-002775.R1                                                                                                                                                                                                                                                                                                                                                                                                                                                                                                                                                                                                                                                                                                                                                                                                                      |
| Article Type:                   | Research                                                                                                                                                                                                                                                                                                                                                                                                                                                                                                                                                                                                                                                                                                                                                                                                                                    |
| Date Submitted by the Author:   | 26-Mar-2013                                                                                                                                                                                                                                                                                                                                                                                                                                                                                                                                                                                                                                                                                                                                                                                                                                 |
| Complete List of Authors:       | Carpenter, Robert; Naval Medical Center San Diego, Infectious Diseases Refugio, Oliver; San Diego State University, Graduate School of Public Health<br>Adams, Nehkonti; Naval Medical Center San Diego, Infectious Diseases<br>O'Brien, Kevin; Naval Medical Center San Diego, Infectious Diseases<br>Johnson, Mark; Naval Medical Center San Diego, Infectious Diseases<br>Groff, Harold; Naval Medical Center San Diego, Infectious Diseases<br>Maves, Ryan; Naval Medical Center San Diego, Infectious Diseases<br>Bavaro, Mary; Naval Medical Center San Diego, Infectious Diseases;<br>Uniformed Services University of the Health Sciences, Infectious Disease Clinical Research Program<br>Crum-Cianflone, Nancy; Naval Medical Center San Diego, Infectious Diseases; San Diego State University, Graduate School of Public Health |
| <b>Primary Subject Heading</b>: | Infectious diseases                                                                                                                                                                                                                                                                                                                                                                                                                                                                                                                                                                                                                                                                                                                                                                                                                         |
| Secondary Subject Heading:      | Sexual health, HIV/AIDS                                                                                                                                                                                                                                                                                                                                                                                                                                                                                                                                                                                                                                                                                                                                                                                                                     |
| Keywords:                       | HIV & AIDS < INFECTIOUS DISEASES, Molecular diagnostics < INFECTIOUS DISEASES, gonorrhea, chlamydia, DADT, MSM                                                                                                                                                                                                                                                                                                                                                                                                                                                                                                                                                                                                                                                                                                                              |
|                                 |                                                                                                                                                                                                                                                                                                                                                                                                                                                                                                                                                                                                                                                                                                                                                                                                                                             |

SCHOLARONE™  
Manuscripts

**Title: Incidence and Factors Associated with Asymptomatic Gonococcal and Chlamydial Infection among US Navy and Marine Corps Men Infected With the Human Immunodeficiency Virus**

**Running Title: HIV and gonococcal/chlamydial infection in US Navy and Marine Corps men**

**Authors:**

1. Robert J. Carpenter, DO, FACP (**corresponding author**)
  - a. Affiliation: Division of Infectious Diseases, Naval Medical Center San Diego
  - b. Position: Infectious Diseases Staff Physician
  - c. Address: 34800 Bob Wilson Drive, San Diego, CA, 92134
  - d. Phone: 619-532-7475
  - e. Fax: 619-532-7478
  - f. Email: rjc311@gmail.com
2. Oliver N. Refugio, MPH
  - a. Affiliation: Graduate School of Public Health, San Diego State University, San Diego, CA
3. Nehkonti Adams, MD
  - a. Affiliation: Division of Infectious Diseases, Naval Medical Center San Diego, San Diego, CA
4. Kevin P. O'Brien
  - a. Affiliation: Division of Infectious Diseases, Naval Medical Center San Diego, San Diego, CA
5. Mark D. Johnson, MD MTM&H
  - a. Affiliation: Division of Infectious Diseases, Naval Medical Center San Diego, San Diego, CA
6. Harold L. Groff, MD MPH
  - a. Affiliation: Division of Infectious Diseases, Naval Medical Center San Diego, San Diego, CA
7. Ryan C. Maves, MD
  - a. Affiliation: Division of Infectious Diseases, Naval Medical Center San Diego, San Diego, CA
8. Mary F. Bavaro, MD
  - a. Affiliation: Division of Infectious Diseases, Naval Medical Center San Diego, San Diego, CA
9. Nancy F. Crum-Cianflone, MD MPH
  - a. Affiliation: Division of Infectious Diseases, Naval Medical Center San Diego, San Diego, CA; Graduate School of Public Health, San Diego State University, San Diego, CA; Naval Health Research Center, San Diego, CA

**Word Count: 2083**

**Conflict of Interest:** There are no conflicts of interest to report. The authors have received no financial support for this manuscript.

**Key words:** HIV, gonorrhoea, Chlamydia, military, MSM, "don't ask, don't tell", DADT

**Disclosure:** The views expressed in this manuscript are those of the authors and do not necessarily reflect the official policy or position of the Department of the Navy, Department of Defense, nor the U.S. Government.

## ARTICLE SUMMARY

### FOCUS

- Is asymptomatic gonorrhoea and chlamydia infection prevalent among US military men?
- If so, are those infections associated with any specific sexual practice or relationship beliefs?

### KEY MESSAGES

- Men who have sex with men (MSM) in the US military are at risk for asymptomatic gonorrhoea and chlamydia infection, predominantly at extragenital sites.
- Sex with men, anal sex, non-Caucasian ethnicity, age <35 years, and HIV infection for <3 years were all associated with asymptomatic infection.
- Repeal of DADT fostered a change in US military medical culture, allowing clinicians to counsel and screen MSM according to established guidelines.

### STRENGTHS

- First comprehensive data set of asymptomatic gonorrhoea/chlamydia infection in a US military population
- First study to describe health needs of men who have sex with men in a US military population

### WEAKNESSES

- Observational study
- Small n (pilot study)
- Inability to obtain 3 site anatomic screening from all participants



**ABSTRACT:**

Objectives: *Neisseria gonorrhoeae* (GC) and *Chlamydia trachomatis* (CT) can facilitate transmission of HIV, and men who have sex with men (MSM) may harbor infections at extragenital sites. Data regarding extragenital GC and CT in military populations are lacking. We examined the incidence and factors associated with asymptomatic infection among HIV-infected military personnel.

Methods: Cross-sectional pilot study of asymptomatic men who underwent nucleic acid amplification screening for GC and CT of the pharynx, rectum, and urine at a single military treatment facility in San Diego, CA. Inclusion criteria: male, HIV-infected, Department of Defense beneficiary. Exclusion criteria: any symptom related to urethra, pharynx, or rectum. One participant was also excluded for recent CT treatment. Data on demographics, sexual practices, and HIV variables were collected. Factors associated with infection were analyzed using chi-square tests.

Results: Ninety-nine HIV-positive men were evaluated - 79% MSM, mean age 31 years, 36% Black, and 33% married. Twenty-four percent were infected with either GC or CT. Rectal swabs were positive in 18% for CT and 3% for GC; pharynx swabs were positive in 8% for GC and 2% for CT. Only 1 infection was detected in urine (GC). Anal sex ( $p=0.04$ ), male partner (OR 7.02,  $p=0.04$ ), and sex at least once weekly (OR 3.28,  $p=0.04$ ) were associated with infection. Associated demographic included age  $<35$  years (OR 6.27,  $p=0.02$ ), non-Caucasian ethnicity ( $p=0.03$ ),  $<3$  years since HIV diagnosis (OR 2.75,  $p=0.04$ ), and previous STI (OR 5.10,  $p=0.001$ ).

Conclusions: We found a high incidence of extragenital GC/CT infection among HIV-infected military men. Only one infection was detected in the urine, signaling the need for aggressive three site screening of MSM. Clinicians should be aware of high incidence in order to enhance health through comprehensive STI screening practices.

## INTRODUCTION

*Neisseria gonorrhoeae* (GC) and *Chlamydia trachomatis* (CT) cause infection in the male urethral, pharyngeal, and rectal mucosa, facilitating transmission of the human immunodeficiency virus (HIV).[1-3] Men who have sex with men (MSM) are at particular risk for harboring these infections at extragenital sites.[4-10] The United States (US) law, 'don't ask, don't tell' (DADT), allowed gay persons to serve in the military but made it unlawful to reveal his/her sexual orientation and was the cause of separation of nearly 14,000 qualified service members.[11] Although there are several published reports regarding GC/CT infections in MSM, limited data exist among US military members.[7 9 10 12-15] Since 1986, the US military maintains a natural history study of HIV-infected persons and reports of GC/CT in this cohort have been published.[16] Additionally, others have reported on GC/CT in US military men.[17-24] However, these reports fail to represent the full spectrum of GC/CT infection because they only include data from urine/urethra. Extragenital anatomic site data has never been previously captured nor reported by US military studies and, again largely because of DADT, comprehensive sexual practices and behaviors have also never been previously captured nor reported. This dearth of data is largely a byproduct of DADT which prohibited the recognition and study of MSM health needs; the law was repealed in 2011.

The Naval Medical Center San Diego (NMCS D) is one of three US Navy HIV Evaluation and Treatment Units and provides health care to approximately 575 HIV-infected Department of Defense beneficiaries, approximately half of whom are currently serving on active military duty. Services offered include comprehensive primary and subspecialty health care, mental health services, prevention counseling and health promotion, and HIV and other sexually transmitted infection (STI) screening and management.[25] However, three anatomic site

1 GC/CT screening was not routinely performed in any US Navy medical treatment facility prior  
2 to this study. As US Department of Defense beneficiaries, these patients receive open,  
3 unrestricted access to care without copayments.  
4  
5  
6  
7  
8

9  
10 Given the lack of data on asymptomatic GC and CT infection among a US military cohort of  
11 HIV-infected men, we conducted a cross-sectional pilot study with the objectives: (1) to  
12 describe the incidence of asymptomatic urethral, pharyngeal, and rectal GC/CT infection in  
13 this population; (2) to describe sexual behaviors, relationship attitudes, and HIV disease  
14 attributes among this cohort; and (3) to identify specific factors associated with asymptomatic  
15 GC/CT infection.  
16  
17  
18  
19  
20  
21  
22

## 23 **MATERIALS AND METHODS**

### 24 **Participants and Procedures**

25  
26 All HIV-infected US Navy and Marine Corps members serving on active duty are required to  
27 participate in a biannual medical and psychosocial evaluation. Those serving at military  
28 bases in the western US and Pacific Basin report to NMCS D for these visits. In order to  
29 minimize selection bias, beginning in September 2010, we presented the study to each  
30 consecutive military member presenting for required HIV evaluation until we enrolled 100  
31 participants. The study was designed as a pilot to guide design of future research. No  
32 incentive to participation was offered. Those who participated did so to optimize personal  
33 sexual health through more thorough STI screening. Inclusion criteria included: male gender,  
34 HIV-infected, receiving care at the NMCS D, and having no symptoms referable to the  
35 pharynx, urethra, or rectum. Those who voluntarily agreed to participate completed a short  
36 questionnaire regarding sexual practices and relationship attitudes. In order to encourage  
37 honest responses, the written questionnaire was administered by the clinic's non-military  
38 preventive medicine counselor and all responses were confidentially maintained.  
39  
40  
41  
42  
43  
44  
45  
46  
47  
48  
49  
50  
51  
52  
53  
54  
55  
56  
57  
58  
59  
60

1 Each participant was screened for asymptomatic GC/CT infection of the urethra, pharynx,  
2 and rectum using a first-void urine sample and posterior pharyngeal and rectal swabs  
3 obtained by their primary HIV provider during their routine, biannual HIV clinic visit. All  
4 collected specimens were collected on the day the questionnaire was completed and all  
5 infections were appropriately treated. The NMCS D laboratory previously verified the APTIMA  
6 Combo2<sup>®</sup> Assay (Gen-Probe Inc., San Diego, CA) for use in the pharynx and rectum  
7 according to Clinical Laboratory Improvement Amendments (CLIA) standards. Medical  
8 records were reviewed by an HIV clinician and data regarding demographics, prior STIs, and  
9 HIV-related data were collected. The study was approved and waiver of informed consent  
10 was granted by the NMCS D Institutional Review Board.

## 26 Data Analysis

27 The data collected (laboratory results, questionnaire responses, and medical record  
28 information) were entered into a Microsoft Excel 2003 (Microsoft Corporation, Redmond, WA)  
29 database and analyzed with SAS<sup>®</sup> version 9.2 (SAS Institute, Cary, NC). Incidence rates  
30 were calculated for each type of infection (GC, CT, or both) at each site. The descriptive  
31 statistics included for categorical variables were counts and proportions, and means and  
32 standard deviations for continuous variables. Chi-square or Fisher's exact tests were  
33 performed, as appropriate, to analyze the bivariate relationships between the factors of  
34 interest and the outcome defined as being positive for either infection (GC and/or CT in at  
35 least one site). Odds ratios (OR), 95% confidence intervals (CI), and *P*-values were reported.  
36 *P*-values less than 0.05 were considered statistically significant.

## RESULTS

1  
2  
3 One hundred six consecutive patients were offered participation in the study, six declined,  
4  
5 and one hundred were enrolled. One participant was later excluded due to recent treatment  
6  
7 of asymptomatic rectal CT infection prior to enrollment. Due to scheduling conflicts and  
8  
9 inability of participant to return to the clinic, and despite several attempts to do so, a urine  
10  
11 specimen was not collected from 3 participants and rectal/pharyngeal swabs from 12. The  
12  
13 cohort (n=99) included 79% who were MSM. The mean age of the cohort was 31 years, and  
14  
15 race was reported as Black in 36%, Caucasian in 35%, Hispanic in 15%, and other in 13%.  
16  
17 Sixty-seven percent were unmarried, and 36% had a previous history of STI. HIV-related  
18  
19 characteristics included a mean CD4 count of 609 cells/mm<sup>3</sup>, 43% had an HIV viral load <48  
20  
21 copies/ $\mu$ L, 51% were receiving antiretroviral therapy, and the mean time since HIV diagnosis  
22  
23 was 63 months. (Table 1)  
24  
25  
26  
27  
28  
29  
30

31 Twenty-four percent had either GC or CT in at least 1 site. The site with the highest  
32  
33 incidence was the rectum (18.4%), followed by the pharynx (9.2%) and the urethra (1%). Of  
34  
35 rectal swabs, 18% were positive for CT and 3% for GC. Of pharynx swabs, 8% were positive  
36  
37 for GC and 2% for CT. Only one infection was detected in urine (GC). (Table 2) Eighty-one  
38  
39 percent of those with GC/CT infection had a positive screening test at only one site, 19%  
40  
41 were positive at two sites, and none were positive at all three sites.  
42  
43  
44  
45  
46  
47

48 In bivariate analysis, anal sex (p=0.04), having a male partner (OR 7.02, p=0.04), and having  
49  
50 sex at least once weekly (OR 3.28, p=0.04) were associated with infection; vaginal sex was  
51  
52 protective (OR 0.20, p=0.03). Demographic factors associated with infection included age  
53  
54 <35 years (OR 6.27, p=0.02), non-Caucasian ethnicity (Black OR 5.50, p=0.04; Hispanic OR  
55  
56 11.00, p=0.01; other race OR 7.33, p=0.03), <3 years since HIV diagnosis (OR 2.75, p=0.04),  
57  
58 and previous STI (OR 5.10, p=0.001). (Table 3, 4)  
59  
60

1  
2  
3 Only about half of participants reported always using condoms during anal sex, and less than  
4  
5 half always required their partner to use condoms during anal sex. During oral sex, less than  
6  
7 15% of participants reported always using condoms and always requiring their partner to use  
8  
9 condoms. (Table 4)  
10  
11

12  
13  
14 With regards to relationship attitudes, 52% of participants reported sexual relations only with  
15  
16 a partner in a serious relationship, while 28% disagreed with this statement. Seventy-six  
17  
18 percent of participants expected monogamy in a serious relationship, while 14% disagreed  
19  
20 with this statement. Twenty-three percent of participants participated in most of their sexual  
21  
22 relations with casual friends and 53% disagreed with this statement. None of these beliefs  
23  
24 were significantly associated with infection. (Table 4)  
25  
26  
27  
28  
29  
30  
31  
32  
33  
34  
35  
36  
37  
38  
39  
40  
41  
42  
43  
44  
45  
46  
47  
48  
49  
50  
51  
52  
53  
54  
55  
56  
57  
58  
59  
60

## DISCUSSION

We found an alarming incidence of GC/CT infection—nearly twice that of non-military MSM in other large California cities.[10] In fact, our incidence may represent an underestimate, since some of our patients may seek screening (and subsequent therapy) at the local county STD clinic prior to their military encounter, due to fear of discipline or discharge.[26 27] We believe there are two important contributors to the high incidence rates observed: DADT and the first-screen effect.

DADT likely contributed the most to undiagnosed infection. The American Medical Association posited that this military law compromised the medical care of gay patients serving in the military.[28] Prior to repeal, military healthcare providers often believed they could not ask, document, nor counsel about sexual behaviors or orientations for fear of revealing MSM practices of their patients that they believed would lead to adverse legal action. Therefore, risk would not have been assessed and the need for screening was unknown and did not occur. DADT also prevented patients from providing honest answers or reports of sexual practices, again for fear of adverse legal action. We started our study prior to the repeal because SECNAVINST 5300.30D (the document that governs management of HIV infection in the Navy and Marine Corps) offered protection against adverse action related to information obtained from a medical or epidemiologic interview. Unfortunately, this provision was not well known to military healthcare providers.

Second, our study facilitated the initiation of sexual risk driven screening for GC/CT infection in our healthcare facility. Hence, study data represent the first time most participants were screened for extragenital GC/CT infection. First-time screening for a condition may reveal more incident cases than subsequent screening, especially in the case of asymptomatic

1 infection, and may partially explain why we detected higher incidence than that found in other  
2 California cities which may represent subsequent screening data.  
3  
4  
5  
6

7 Our study also had several important findings regarding HIV-positive men serving in the US  
8 military. With regards to sexual practices, most respondents were MSM and engaged in oral,  
9 anal (receptive and insertive), and oral-anal sex. As expected, most respondents do not use  
10 condoms during oral sex. Surprisingly though was that nearly half of respondents do not  
11 always use condoms or require their partners to use condoms during anal sex. Safer sex  
12 fatigue, serosorting, and seropositioning may be contributors to low rates of condom use.[29]  
13  
14  
15  
16  
17  
18  
19  
20  
21 Regarding relationship attitudes, about half of respondents believe sexual relations should  
22 only occur with partners in a serious relationship while approximately one-quarter engage in  
23 sex with casual friends. When in a serious relationship, the majority of respondents expect  
24 monogamy.  
25  
26  
27  
28  
29  
30  
31  
32

33 The significant findings noted in our study were not unexpected. MSM, anal sex, non-  
34 Caucasian ethnicity, and younger age were associated with GC/CT and have been identified  
35 as STI risk factors in other studies.[16 30-32] Also, it follows that a person who recently  
36 acquired HIV infection or has a history of STI would be at higher risk for GC/CT infection.  
37  
38  
39  
40  
41  
42  
43  
44  
45  
46  
47  
48  
49  
50  
51  
52  
53  
54  
55  
56  
57  
58  
59  
60  
The increased risk among non-Caucasians may be related to cultural or societal stigma  
which may prevent an individual from seeking screening services (and need to disclose self-  
perceived taboo sexual behavior) in a way that DADT likely prevented military MSM from  
seeking or receiving appropriate screening.

We acknowledge potential limitations of our study: those inherent to an observational design,  
inability to achieve 100% three site screening from all participants, and small study  
population. Although our sample size is small, it is worth noting that trends in our data are



1 similar to trends noted in larger non-military studies of GC/CT infection: most infections were  
2 detected at extragenital sites, the majority of rectal infections were due to CT, and the  
3 majority of pharyngeal infections were due to GC. Finally, there may have been some  
4 reluctance of participants to answer survey questions honestly, although we believe this was  
5 minimized by our confidential survey procedures and as reflected by candid responses we  
6 did receive.  
7  
8  
9  
10  
11  
12  
13

14  
15  
16  
17 We have generated the first comprehensive data set of asymptomatic GC/CT infection in a  
18 US military population. Although much of what we have learned was assumed to be true, this  
19 is the first systematic description and underscores the need for military healthcare providers  
20 to screen their MSM population for infection at three anatomic sites. Also, as noted in larger  
21 studies, we found that reliance on urine/urethral screening alone will fail to detect the vast  
22 majority of asymptomatic infections in an MSM population. Finally, low rates of reported  
23 condom use among HIV-positive participants signals the need to enhance safer sex  
24 prevention efforts among MSM.  
25  
26  
27  
28  
29  
30  
31  
32  
33  
34  
35  
36  
37

38 We hope the results of our pilot study will inform and motivate those who design larger,  
39 multisite STI clinical trials for the US military. Although our study was small, we can conclude  
40 that MSM make up a significant proportion of our HIV-infected population. DADT has been  
41 repealed and US Defense Secretary Panetta has mandated extension of military benefits to  
42 same sex partners.[33] Therefore, we believe it's also time to include MSM in our military  
43 research to enhance overall health.  
44  
45  
46  
47  
48  
49  
50  
51  
52  
53  
54  
55  
56  
57  
58  
59  
60

## TABLES

Table 1. HIV-infected male demographic characteristics, 2011—San Diego, California (n=99)

| HIV variables                              |             |
|--------------------------------------------|-------------|
| CD4 count mean (SD), cells/mm <sup>3</sup> | 609 (216)   |
| Suppressed HIV VL (<48 copies/μL)          | 43%         |
| Receiving ART                              | 51%         |
| Time since HIV diagnosis mean (SD), months | 62.8 (59.9) |
| Demographic variables                      |             |
| Age                                        |             |
| Mean (SD), years                           | 30.9 (8.2)  |
| <25 years                                  | 28%         |
| 25-34 years                                | 38%         |
| ≥ 35 years                                 | 33%         |
| Ethnicity                                  |             |
| Black                                      | 36%         |
| Caucasian                                  | 35%         |
| Hispanic                                   | 15%         |
| Other                                      | 13%         |
| Marital Status                             |             |
| Married                                    | 33%         |
| Single                                     | 67%         |
| Sexual Practice                            |             |
| MSM                                        | 79%         |
| MSW                                        | 21%         |
| Previous STI                               |             |
| Yes                                        | 36%         |

VL = plasma viral load

ART = antiretroviral therapy

MSM = men who have sex with men

MSW = men who have sex with women

SD = standard deviation

STI = sexually transmitted infection

Table 2. Prevalence of asymptomatic infection by anatomic site, HIV-infected men, 2011—San Diego, California (n=99)\*

|         | Either Infection |    |            | CT    |    |            | GC    |    |            |
|---------|------------------|----|------------|-------|----|------------|-------|----|------------|
|         | Cases            | N  | Prevalence | Cases | N  | Prevalence | Cases | N  | Prevalence |
|         |                  |    | Rate       |       |    | Rate       |       |    | Rate       |
| Overall | 20               | 83 | 24.1%      | 17    | 83 | 20.5%      | 8     | 83 | 9.6%       |
| Urethra | 1                | 96 | 1.0%       | 0     | 96 | 0.0%       | 1     | 96 | 1.0%       |
| Rectum  | 16               | 87 | 18.4%      | 16    | 87 | 18.4%      | 3     | 87 | 3.4%       |
| Pharynx | 8                | 87 | 9.2%       | 2     | 87 | 2.3%       | 7     | 87 | 8.0%       |

\*Some participants did not have screening at all three sites.

Table 3. Survey responses – demographic &amp; sexual practices by infection status, HIV-infected men, 2011—San Diego, California

|                                              | Total |        | CT and/or GC Infection |        | Neither infection |        | OR    | 95% CI      | p value <sup>a</sup> |
|----------------------------------------------|-------|--------|------------------------|--------|-------------------|--------|-------|-------------|----------------------|
|                                              | n     | (%)    | n                      | (%)    | n                 | (%)    |       |             |                      |
| <b>Demographic variables (N respondents)</b> |       |        |                        |        |                   |        |       |             |                      |
| Gender of sexual partner(s) (N=98)           |       |        |                        |        |                   |        |       |             |                      |
| Women only                                   | 21    | (21.4) | 1                      | (4.8)  | 20                | (26.0) | REF   | --          | --                   |
| Male (MSM)                                   | 77    | (78.6) | 20                     | (95.2) | 57                | (74.0) | 7.02  | 1.88, 55.72 | 0.04                 |
| Race/ethnicity (N=99)                        |       |        |                        |        |                   |        |       |             |                      |
| White                                        | 35    | (35.4) | 2                      | (9.5)  | 33                | (42.3) | REF   | --          | --                   |
| Black                                        | 36    | (36.4) | 9                      | (42.9) | 27                | (34.7) | 5.50  | 1.10, 27.64 | 0.04                 |
| Hispanic                                     | 15    | (15.2) | 6                      | (28.6) | 9                 | (11.5) | 11.00 | 1.89, 64.06 | 0.01                 |
| Other                                        | 13    | (13.0) | 4                      | (19.0) | 9                 | (11.5) | 7.33  | 1.15, 46.66 | 0.03                 |
| Age (N=99)                                   |       |        |                        |        |                   |        |       |             |                      |
| <35 years                                    | 66    | (66.7) | 19                     | (90.5) | 47                | (60.3) | 6.27  | 1.36, 28.82 | 0.02                 |
| ≥ 35 years                                   | 33    | (33.3) | 2                      | (9.5)  | 31                | (39.7) | REF   | --          | --                   |
| Previous history of STI (N=99)               |       |        |                        |        |                   |        |       |             |                      |
| No                                           | 63    | (63.6) | 7                      | (33.3) | 56                | (71.8) | REF   | --          | --                   |
| Yes                                          | 36    | (36.4) | 14                     | (66.7) | 22                | (28.2) | 5.10  | 1.81, 14.30 | 0.001                |
| Number of years since HIV diagnosis (N=99)   |       |        |                        |        |                   |        |       |             |                      |
| > 3 years                                    | 57    | (57.6) | 8                      | (38.1) | 49                | (62.8) | REF   | --          | --                   |
| ≤ 3 years                                    | 42    | (42.4) | 13                     | (61.9) | 29                | (37.2) | 2.75  | 1.02, 7.41  | 0.04                 |
| <b>Sexual practices (N respondents)</b>      |       |        |                        |        |                   |        |       |             |                      |
| Vaginal sex (N=99)                           |       |        |                        |        |                   |        |       |             |                      |
| No                                           | 70    | (70.7) | 19                     | (90.5) | 51                | (65.4) | REF   | --          | --                   |
| Yes                                          | 29    | (29.3) | 2                      | (9.5)  | 27                | (34.6) | 0.20  | 0.04, 0.92  | 0.03                 |
| Oral sex <sup>b</sup> (N=99)                 |       |        |                        |        |                   |        |       |             |                      |
| No                                           | 3     | (3.0)  | 0                      | (0)    | 3                 | (3.8)  | REF   | --          | --                   |
| Yes                                          | 96    | (97.0) | 21                     | (100)  | 75                | (96.2) | --    | --          | 1.00                 |
| Anal sex <sup>b</sup> (N=99)                 |       |        |                        |        |                   |        |       |             |                      |
| No                                           | 15    | (15.2) | 0                      | (0)    | 15                | (19.2) | REF   | --          | --                   |
| Yes                                          | 84    | (84.8) | 21                     | (100)  | 63                | (80.8) | --    | --          | 0.04                 |
| Insertive anal sex (N=80)                    |       |        |                        |        |                   |        |       |             |                      |
| No                                           | 15    | (18.8) | 5                      | (23.8) | 10                | (16.9) | 1.00  | --          | --                   |
| Yes                                          | 65    | (81.2) | 16                     | (76.2) | 49                | (83.1) | 0.65  | 0.19, 2.20  | 0.52                 |
| Receptive anal sex (N=80)                    |       |        |                        |        |                   |        |       |             |                      |
| No                                           | 17    | (21.3) | 2                      | (9.5)  | 15                | (25.4) | REF   | --          | --                   |
| Yes                                          | 63    | (78.7) | 19                     | (90.5) | 44                | (74.6) | 3.32  | 0.67, 15.57 | 0.21                 |

<sup>a</sup>Fisher's exact test was performed for variables with expected cell frequencies <5, otherwise a Chi-square test was performed.

<sup>b</sup>Odds ratios and 95% confidence intervals not available due to one or more zero cells.

MSM = men who have sex with men (self-reported).

Oral and oral-anal sex were not significantly associated with infection with p>0.05

Table 4. Survey responses – relationship attitudes &amp; condom use by infection status, HIV-infected men, 2011—San Diego, California

|                                                                     | Total |        | CT and/or GC Infection |        | Neither infection |        | OR   | 95% CI      | p value <sup>a</sup> |
|---------------------------------------------------------------------|-------|--------|------------------------|--------|-------------------|--------|------|-------------|----------------------|
|                                                                     | n     | (%)    | n                      | (%)    | n                 | (%)    |      |             |                      |
| <b>Relationship attitudes (N respondents)</b>                       |       |        |                        |        |                   |        |      |             |                      |
| Sexual relationships with >1 partner in the past year (N=99)        |       |        |                        |        |                   |        |      |             |                      |
| No                                                                  | 39    | (39.4) | 5                      | (23.8) | 34                | (43.6) | REF  | --          | --                   |
| Yes                                                                 | 60    | (60.6) | 16                     | (76.2) | 44                | (56.4) | 2.47 | 0.82, 7.42  | 0.10                 |
| Frequency of sexual activity in the past year (N=99)                |       |        |                        |        |                   |        |      |             |                      |
| < Once a week                                                       | 38    | (38.4) | 4                      | (19.0) | 34                | (43.6) | REF  | --          | --                   |
| At least once a week                                                | 61    | (61.6) | 17                     | (81.0) | 44                | (56.4) | 3.28 | 1.01, 10.66 | 0.04                 |
| Sexual relations only with partner in a serious relationship (N=99) |       |        |                        |        |                   |        |      |             |                      |
| Strongly agree                                                      | 51    | (51.5) | 7                      | (33.3) | 44                | (56.4) | REF  | --          | --                   |
| Neither agree/disagree                                              | 20    | (20.2) | 5                      | (23.8) | 15                | (19.2) | 2.10 | 0.59, 7.60  | 0.26                 |
| Strongly disagree                                                   | 28    | (28.3) | 9                      | (42.9) | 19                | (24.4) | 2.98 | 0.97, 9.17  | 0.06                 |
| Expect monogamy in a serious relationship (N=99)                    |       |        |                        |        |                   |        |      |             |                      |
| Strongly agree                                                      | 75    | (75.8) | 14                     | (66.7) | 61                | (78.1) | REF  | --          | --                   |
| Neither agree/disagree                                              | 10    | (10.1) | 3                      | (14.3) | 7                 | (9.0)  | 1.87 | 0.43, 8.14  | 0.41                 |
| Strongly disagree                                                   | 14    | (14.1) | 4                      | (19.0) | 10                | (12.9) | 1.74 | 0.48, 6.38  | 0.40                 |
| Sexual activities mostly with casual friends (N=99)                 |       |        |                        |        |                   |        |      |             |                      |
| Strongly disagree                                                   | 52    | (53.0) | 8                      | (38.0) | 44                | (57.2) | REF  | --          | --                   |
| Neither agree/disagree                                              | 24    | (24.5) | 9                      | (43.0) | 15                | (19.5) | 3.30 | 1.08, 10.10 | 0.04                 |
| Strongly agree                                                      | 22    | (22.5) | 4                      | (19.0) | 18                | (23.3) | 1.22 | 0.33, 4.57  | 0.77                 |
| <b>Condom use (N respondents)</b>                                   |       |        |                        |        |                   |        |      |             |                      |
| Self-condom use during oral sex (N=92)                              |       |        |                        |        |                   |        |      |             |                      |
| Always                                                              | 12    | (13.0) | 4                      | (20.0) | 8                 | (11.1) | REF  | --          | --                   |
| Do not always                                                       | 80    | (87.0) | 16                     | (80.0) | 64                | (88.9) | 0.50 | 0.13, 1.87  | 0.29                 |
| Partner-condom use during oral sex (N=90)                           |       |        |                        |        |                   |        |      |             |                      |
| Always                                                              | 13    | (14.4) | 4                      | (19.0) | 9                 | (13.0) | REF  | --          | --                   |
| Do not always                                                       | 77    | (85.6) | 17                     | (81.0) | 60                | (87.0) | 0.64 | 0.17, 2.34  | 0.49                 |
| Self-condom use during anal sex (N=82)                              |       |        |                        |        |                   |        |      |             |                      |
| Always                                                              | 42    | (51.2) | 9                      | (45.0) | 33                | (53.2) | REF  | --          | --                   |
| Do not always                                                       | 40    | (48.8) | 11                     | (55.0) | 29                | (46.8) | 1.39 | 0.51, 3.83  | 0.52                 |
| Partner-condom use during anal sex (N=80)                           |       |        |                        |        |                   |        |      |             |                      |
| Always                                                              | 37    | (46.2) | 8                      | (38.1) | 29                | (49.2) | REF  | --          | --                   |
| Do not always                                                       | 43    | (53.8) | 13                     | (61.9) | 30                | (50.8) | 1.57 | 0.57, 4.35  | 0.38                 |

<sup>a</sup>Fisher's exact test was performed for variables with expected cell frequencies <5, otherwise a Chi-square test was performed.

<sup>b</sup>Odds ratios and 95% confidence intervals not available due to one or more zero cells.

**LICENSE FOR PUBLICATION STATEMENT**

The Corresponding Author has the right to grant on behalf of all authors and does grant on behalf of all authors, an exclusive license (or non-exclusive for government employees) on a worldwide basis to the BMJ Group and co-owners or contracting owning societies (where published by the BMJ Group on their behalf), and its Licensees to permit this article (if accepted) to be published in Sexually Transmitted Infections and any other BMJ Group products and to exploit all subsidiary rights, as set out in our license.

**CONTRIBUTORSHIP STATEMENT**

Robert J. Carpenter contributed to conception and design, acquisition of data, and analysis and interpretation of data, participated in drafting the article or revising it critically for important intellectual content, and was involved in final approval of the version to be published.

All other authors listed contributed to acquisition of data, participated in drafting the article or revising it critically for important intellectual content, and were involved in final approval of the version to be published.

**DATA SHARING STATEMENT**

No additional data available.

## REFERENCES

1. Cohen MS, Hoffman IF, Royce RA, et al. Reduction of concentration of HIV-1 in semen after treatment of urethritis: implications for prevention of sexual transmission of HIV-1. *AIDSCAP Malawi Research Group. Lancet* 1997;**349**(9069):1868-73
2. Galvin SR, Cohen MS. The role of sexually transmitted diseases in HIV transmission. *Nature reviews. Microbiology* 2004;**2**(1):33-42 doi: 10.1038/nrmicro794[published Online First: Epub Date] |.
3. Vernazza PL, Eron JJ, Fiscus SA, Cohen MS. Sexual transmission of HIV: infectiousness and prevention. *Aids* 1999;**13**(2):155-66
4. Workowski KA, Berman S. Sexually transmitted diseases treatment guidelines, 2010. *MMWR Recomm Rep* 2010;**59**(RR-12):1-110
5. Park J, Marcus JL, Pandori M, Snell A, Philip SS, Bernstein KT. Sentinel surveillance for pharyngeal chlamydia and gonorrhea among men who have sex with men--San Francisco, 2010. *Sexually transmitted diseases* 2012;**39**(6):482-4 doi: 10.1097/OLQ.0b013e3182495e2f[published Online First: Epub Date] |.
6. Hoover KW, Butler M, Workowski K, et al. STD screening of HIV-infected MSM in HIV clinics. *Sexually transmitted diseases* 2010;**37**(12):771-6 doi: 10.1097/OLQ.0b013e3181e50058[published Online First: Epub Date] |.
7. Schachter J, Moncada J, Liska S, Shayevich C, Klausner JD. Nucleic acid amplification tests in the diagnosis of chlamydial and gonococcal infections of the oropharynx and rectum in men who have sex with men. *Sexually transmitted diseases* 2008;**35**(7):637-42 doi: 10.1097/OLQ.0b013e31817bdd7e[published Online First: Epub Date] |.
8. Rieg G, Lewis RJ, Miller LG, Witt MD, Guerrero M, Daar ES. Asymptomatic sexually transmitted infections in HIV-infected men who have sex with men: prevalence, incidence, predictors, and screening strategies. *AIDS patient care and STDs* 2008;**22**(12):947-54 doi: 10.1089/apc.2007.0240[published Online First: Epub Date] |.
9. Geisler WM, Whittington WL, Suchland RJ, Stamm WE. Epidemiology of anorectal chlamydial and gonococcal infections among men having sex with men in Seattle: utilizing serovar and auxotype strain typing. *Sexually transmitted diseases* 2002;**29**(4):189-95
10. Kent CK, Chaw JK, Wong W, et al. Prevalence of rectal, urethral, and pharyngeal chlamydia and gonorrhea detected in 2 clinical settings among men who have sex with men: San Francisco, California, 2003. *Clinical infectious diseases : an official publication of the Infectious Diseases Society of America* 2005;**41**(1):67-74 doi: CID35177 [pii] 10.1086/430704[published Online First: Epub Date] |.
11. Burrelli DF. "Don't Ask, Don't Tell": The Law and Military Policy on Same-Sex Behavior. *Secondary "Don't Ask, Don't Tell": The Law and Military Policy on Same-Sex Behavior* 2010. <http://www.fas.org/sgp/crs/misc/R40782.pdf>.
12. Miller WC, Zenilman JM. Epidemiology of chlamydial infection, gonorrhea, and trichomoniasis in the United States--2005. *Infect Dis Clin North Am* 2005;**19**(2):281-96 doi: S0891-5520(05)00032-2 [pii] 10.1016/j.idc.2005.04.001[published Online First: Epub Date] |.
13. Mimiaga MJ, Helms DJ, Reisner SL, et al. Gonococcal, chlamydia, and syphilis infection positivity among MSM attending a large primary care clinic, Boston, 2003 to 2004. *Sexually transmitted diseases* 2009;**36**(8):507-11 doi: 10.1097/OLQ.0b013e3181a2ad98[published Online First: Epub Date] |.
14. Phipps W, Stanley H, Kohn R, Stansell J, Klausner JD. Syphilis, chlamydia, and gonorrhea screening in HIV-infected patients in primary care, San Francisco, California, 2003. *AIDS patient care and STDs* 2005;**19**(8):495-8 doi: 10.1089/apc.2005.19.495[published Online First: Epub Date] |.
15. Rietmeijer CA, Patnaik JL, Judson FN, Douglas JM, Jr. Increases in gonorrhea and sexual risk behaviors among men who have sex with men: a 12-year trend analysis at the Denver Metro Health Clinic. *Sexually transmitted diseases* 2003;**30**(7):562-7
16. Spaulding AB, Lifson AR, Iverson ER, et al. Gonorrhoea or chlamydia in a U.S. military HIV-positive cohort. *Sexually transmitted infections* 2012;**88**(4):266-71 doi: 10.1136/sextrans-2011-050173[published Online First: Epub Date] |.

- 1 17. Aldous WK, Robertson JL, Robinson BJ, et al. Rates of gonorrhoea and Chlamydia in U.S. military personnel  
2 deployed to Iraq and Afghanistan (2004-2009). *Military medicine* 2011;**176**(6):705-10
- 3 18. Brodine SK, Shafer MA, Shaffer RA, et al. Asymptomatic sexually transmitted disease prevalence in four  
4 military populations: application of DNA amplification assays for Chlamydia and gonorrhoea screening.  
5 *The Journal of infectious diseases* 1998;**178**(4):1202-4
- 6 19. Sena AC, Miller WC, Hoffman IF, et al. Trends of gonorrhoea and chlamydial infection during 1985-1996  
7 among active-duty soldiers at a United States Army installation. *Clinical infectious diseases : an official*  
8 *publication of the Infectious Diseases Society of America* 2000;**30**(4):742-8 doi:  
9 10.1086/313742[published Online First: Epub Date]].
- 10 20. Cecil JA, Howell MR, Tawes JJ, et al. Features of Chlamydia trachomatis and Neisseria gonorrhoeae  
11 infection in male Army recruits. *The Journal of infectious diseases* 2001;**184**(9):1216-9 doi:  
12 10.1086/323662[published Online First: Epub Date]].
- 13 21. Zenilman JM, Glass G, Shields T, Jenkins PR, Gaydos JC, McKee KT, Jr. Geographic epidemiology of  
14 gonorrhoea and chlamydia on a large military installation: application of a GIS system. *Sexually*  
15 *transmitted infections* 2002;**78**(1):40-4
- 16 22. Shafer MA, Boyer CB, Shaffer RA, Schachter J, Ito SI, Brodine SK. Correlates of sexually transmitted diseases  
17 in a young male deployed military population. *Military medicine* 2002;**167**(6):496-500
- 18 23. Arcari CM, Gaydos JC, Howell MR, McKee KT, Gaydos CA. Feasibility and short-term impact of linked  
19 education and urine screening interventions for Chlamydia and gonorrhoea in male army recruits.  
20 *Sexually transmitted diseases* 2004;**31**(7):443-7
- 21 24. Wood BJ, Gaydos JC, McKee KT, Jr., Gaydos CA. Comparison of the urine Leukocyte Esterase Test to a  
22 Nucleic Acid Amplification Test for screening non-health care-seeking male soldiers for Chlamydia  
23 trachomatis and Neisseria gonorrhoeae infections. *Military medicine* 2007;**172**(7):770-2
- 24 25. Crum NF, Grillo M, Wallace MR. HIV care in the U.S. Navy: a multidisciplinary approach. *Military medicine*  
25 **2005**;**170**(12):1019-25
- 26 26. Katz KA. Health hazards of "don't ask, don't tell". *N Engl J Med* 2010;**363**(25):2380-1 doi:  
27 10.1056/NEJMp1012496[published Online First: Epub Date]].
- 28 27. Smith DM. Active duty military personnel presenting for care at a Gay Men's Health Clinic. *J Homosex*  
29 **2008**;**54**(3):277-9 doi: 10.1080/00918360801982173[published Online First: Epub Date]].
- 30 28. O'Reilly KB. AMA meeting: "Don't ask, don't tell" said to hurt patient care; repeal urged. *Secondary AMA*  
31 *meeting: "Don't ask, don't tell" said to hurt patient care; repeal urged* 2009. [http://www.ama-](http://www.ama-assn.org/amednews/2009/11/23/prsc1123.htm)  
32 [assn.org/amednews/2009/11/23/prsc1123.htm](http://www.ama-assn.org/amednews/2009/11/23/prsc1123.htm).
- 33 29. McFarland W, Chen YH, Nguyen B, et al. Behavior, intention or chance? A longitudinal study of HIV  
34 seroadaptive behaviors, abstinence and condom use. *AIDS Behav* 2012;**16**(1):121-31 doi:  
35 10.1007/s10461-011-9936-8[published Online First: Epub Date]].
- 36 30. Mustanski BS, Newcomb ME, Du Bois SN, Garcia SC, Grov C. HIV in young men who have sex with men: a  
37 review of epidemiology, risk and protective factors, and interventions. *J Sex Res* 2011;**48**(2-3):218-53  
38 doi: 10.1080/00224499.2011.558645[published Online First: Epub Date]].
- 39 31. Newman LM, Berman SM. Epidemiology of STD disparities in African American communities. *Sexually*  
40 *transmitted diseases* 2008;**35**(12 Suppl):S4-12 doi: 10.1097/OLQ.0b013e31818eb90e[published Online  
41 *First: Epub Date*]].
- 42 32. Wolitski RJ, Fenton KA. Sexual health, HIV, and sexually transmitted infections among gay, bisexual, and  
43 other men who have sex with men in the United States. *AIDS Behav* 2011;**15 Suppl 1**:S9-17 doi:  
44 10.1007/s10461-011-9901-6[published Online First: Epub Date]].
- 45 33. Panetta L. Memorandum for Secretaries of the Military Departments Acting Under Secretary of Defense for  
46 Personnel and Readiness. *Secondary Memorandum for Secretaries of the Military Departments Acting*  
47 *Under Secretary of Defense for Personnel and Readiness* 2013. [http://www.defense.gov/news/Same-](http://www.defense.gov/news/Same-SexBenefitsMemo.pdf)  
48 [SexBenefitsMemo.pdf](http://www.defense.gov/news/Same-SexBenefitsMemo.pdf).

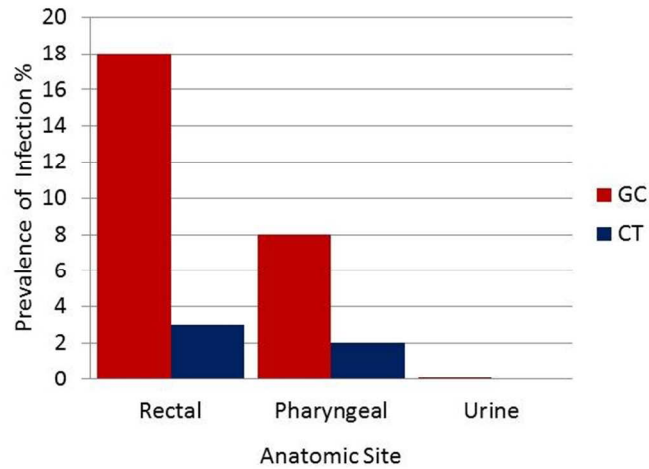

Distribution of asymptomatic gonococcal (GC) and chlamydial (CT) prevalence among HIV-infected men, San Diego, California, 2011  
254x190mm (96 x 96 DPI)



**Title:** ~~Prevalence~~Incidence and Factors Associated with Asymptomatic Gonococcal and Chlamydial Infection among US ~~Military~~Navy and Marine Corps Men Infected With the Human Immunodeficiency Virus

**Running Title:** HIV and gonococcal/chlamydial infection in US ~~military members~~Navy and Marine Corps men

**Authors:**

1. Robert J. Carpenter, DO, FACP (**corresponding author**)
  - a. Affiliation: Division of Infectious Diseases, Naval Medical Center San Diego
  - b. Position: Infectious Diseases Staff Physician
  - c. Address: 34800 Bob Wilson Drive, San Diego, CA, 92134
  - d. Phone: 619-532-7475
  - e. Fax: 619-532-7478
  - f. Email: rjc311@gmail.com
2. Oliver N. Refugio, MPH
  - a. Affiliation: Graduate School of Public Health, San Diego State University, San Diego, CA
3. Nehkonti Adams, MD
  - a. Affiliation: Division of Infectious Diseases, Naval Medical Center San Diego, San Diego, CA
4. Kevin P. O'Brien
  - a. Affiliation: Division of Infectious Diseases, Naval Medical Center San Diego, San Diego, CA
5. Mark D. Johnson, MD MTM&H
  - a. Affiliation: Division of Infectious Diseases, Naval Medical Center San Diego, San Diego, CA
6. Harold L. Groff, MD MPH
  - a. Affiliation: Division of Infectious Diseases, Naval Medical Center San Diego, San Diego, CA
7. Ryan C. Maves, MD
  - a. Affiliation: Division of Infectious Diseases, Naval Medical Center San Diego, San Diego, CA
8. Mary F. Bavaro, MD
  - a. Affiliation: Division of Infectious Diseases, Naval Medical Center San Diego, San Diego, CA
9. Nancy F. Crum-Cianflone, MD MPH
  - a. Affiliation: Division of Infectious Diseases, Naval Medical Center San Diego, San Diego, CA; Graduate School of Public Health, San Diego State University, San Diego, CA; Naval Health Research Center, San Diego, CA

**Word Count:** ~~1901~~2083

**Conflict of Interest:** There are no conflicts of interest to report. The authors have received no financial support for this manuscript.

**Key words:** HIV, gonorrhoea, Chlamydia, military, MSM, "don't ask, don't tell", DADT

**Disclosure:** The views expressed in this manuscript are those of the authors and do not necessarily reflect the official policy or position of the Department of the Navy, Department of Defense, nor the U.S. Government.

## ARTICLE SUMMARY

### FOCUS

- Is asymptomatic gonorrhoea and chlamydia infection prevalent among US military men?
- If so, are those infections associated with any specific sexual practice or relationship beliefs?

### KEY MESSAGES

- Men who have sex with men (MSM) in the US military are at risk for asymptomatic gonorrhoea and chlamydia infection, predominantly at extragenital sites.
- Sex with men, anal sex, non-Caucasian ethnicity, age <35 years, and HIV infection for <3 years were all associated with asymptomatic infection.
- Repeal of DADT fostered a change in US military medical culture, allowing clinicians to counsel and screen MSM according to established guidelines.

### STRENGTHS

- First comprehensive data set of asymptomatic gonorrhoea/chlamydia infection in a US military population
- First study to describe health needs of men who have sex with men in a US military population

### WEAKNESSES

- Observational study
- Small n (pilot study)
- Inability to obtain 3 site anatomic screening from all participants

**ABSTRACT:**

Objectives: *Neisseria gonorrhoeae* (GC) and *Chlamydia trachomatis* (CT) can facilitate transmission of HIV, and men who have sex with men (MSM) may harbor infections at extragenital sites. Data regarding extragenital GC and CT in military populations are lacking. We examined the prevalence and factors associated with asymptomatic GC and CT infection among HIV-infected military personnel.

Methods: Cross-sectional pilot study of asymptomatic men who underwent nucleic acid amplification screening for GC and CT of the pharynx, rectum, and urine at a single military treatment facility in San Diego, CA. Inclusion criteria: male, HIV-infected, Department of Defense beneficiary. Exclusion criteria: any symptom related to urethra, pharynx, or rectum. One participant was also excluded for recent CT treatment. Data on demographics, sexual practices, and HIV variables were collected. Factors associated with infection were analyzed using chi-square tests.

Results: Ninety-nine HIV-positive men were evaluated - 79% MSM, mean age 31 years, 36% Black, and 33% married. Twenty-four percent were infected with either GC or CT. Rectal swabs were positive in 18% for CT and 3% for GC; pharynx swabs were positive in 8% for GC and 2% for CT. Only 1 infection was detected in urine (GC). Anal sex ( $p=0.04$ ), male partner (OR 7.02,  $p=0.04$ ), and sex at least once weekly (OR 3.28,  $p=0.04$ ) were associated with infection. Associated demographic included age <35 years (OR 6.27,  $p=0.02$ ), non-Caucasian ethnicity ( $p=0.03$ ), <3 years since HIV diagnosis (OR 2.75,  $p=0.04$ ), and previous STI (OR 5.10,  $p=0.001$ ).

Conclusions: We found a high prevalence of extragenital GC/CT infection among HIV-infected military men. Only one infection was detected in the urine, signaling the need for aggressive three site screening of MSM. Clinicians should be aware of high prevalence in order to enhance health through comprehensive STI screening practices.

## INTRODUCTION

*Neisseria gonorrhoeae* (GC) and *Chlamydia trachomatis* (CT) cause infection in the male urethral, pharyngeal, and rectal mucosa, facilitating transmission of the human immunodeficiency virus (HIV).[1-3] Men who have sex with men (MSM) are at particular risk for harboring these infections at extragenital sites.[4-10] The United States (US) law, 'don't ask, don't tell' (DADT), allowed gay persons to serve in the military but made it unlawful to reveal his/her sexual orientation and was the cause of separation of nearly 14,000 qualified service members.[11] Although there are several published reports regarding GC/CT infections in MSM, little-limited data exist among US military members.[7 9 10 12-15] Since 1986, the US military maintains a natural history study of HIV-infected persons and reports of GC/CT in this cohort have been published.[16] Additionally, others have reported on GC/CT in US military men.[17-24] However, these reports fail to represent the full spectrum of GC/CT infection because they only include data from urine/urethra. Extragenital anatomic site data has never been previously captured nor reported by US military studies and, again largely because of DADT, comprehensive sexual practices and behaviors have also never been previously captured nor reported. This dearth of data is largely a byproduct of DADT which prohibited the recognition and study of MSM health needs; the law was repealed in 2011.

The Naval Medical Center San Diego (NMCS D) is one of three US Navy HIV Evaluation and Treatment Units and provides health care to approximately 575 HIV-infected Department of Defense beneficiaries, approximately half of whom are currently serving on active military duty. Services offered include comprehensive primary and subspecialty health care, mental health services, prevention counseling and health promotion, and HIV and other sexually transmitted infection (STI) screening and management.[25] However, three anatomic site

1 | ~~asymptomatic~~ GC/CT screening was not routinely performed in any US Navy medical  
2  
3 treatment facility prior to this study. As US Department of Defense beneficiaries, these  
4  
5 patients receive open, unrestricted access to care without copayments.  
6  
7

8  
9  
10 Given the lack of data on asymptomatic GC and CT infection among a US military cohort of  
11  
12 HIV-infected men, we conducted a cross-sectional pilot study with the objectives: (1) to  
13  
14 describe the ~~prevalence~~incidence of asymptomatic urethral, pharyngeal, and rectal GC/CT  
15  
16 infection in this population; (2) to describe sexual behaviors, relationship attitudes, and HIV  
17  
18 disease attributes among this cohort; and (3) to identify specific factors associated with  
19  
20 asymptomatic GC/CT infection.  
21  
22

## 23 **MATERIALS AND METHODS**

### 24 **Participants and Procedures**

25  
26 All HIV-infected US Navy and Marine Corps members serving on active duty are required to  
27  
28 participate in a biannual medical and psychosocial evaluation. Those serving at military  
29  
30 bases in the western US and Pacific Basin report to NMCS D for these visits. In order to  
31  
32 minimize selection bias, beginning in September 2010, we presented the study to each  
33  
34 consecutive military member presenting for required HIV evaluation until we enrolled 100  
35  
36 participants. The study was designed as a pilot to guide design of future research. No  
37  
38 incentive to participation was offered. Those who participated did so to optimize personal  
39  
40 sexual health through more thorough STI screening. Inclusion criteria included: male gender,  
41  
42 HIV-infected, receiving care at the NMCS D, and having no symptoms referable to the  
43  
44 pharynx, urethra, or rectum. Those who voluntarily agreed to participate completed a short  
45  
46 questionnaire regarding sexual practices and relationship attitudes. In order to encourage  
47  
48 honest responses, the written questionnaire was administered by the clinic's non-military  
49  
50 preventive medicine counselor and all responses were confidentially maintained.  
51  
52  
53  
54  
55  
56  
57  
58  
59  
60

1 Each participant was screened for asymptomatic GC/CT infection of the urethra, pharynx,  
2 and rectum using a first-void urine sample and posterior pharyngeal and rectal swabs  
3  
4 obtained by their primary HIV provider during their routine, biannual HIV clinic visit. All  
5  
6 collected specimens were collected on the day the questionnaire was completed and a  
7  
8 prevalent infections were appropriately treated. The NMCS D laboratory previously verified  
9  
10 the APTIMA Combo2<sup>®</sup> Assay (Gen-Probe Inc., San Diego, CA) for use in the pharynx and  
11  
12 the rectum according to Clinical Laboratory Improvement Amendments (CLIA) standards.  
13  
14  
15 Medical records were reviewed by an HIV clinician and data regarding demographics, prior  
16  
17 STIs, and HIV-related data were collected. The study was approved and waiver of informed  
18  
19 consent was granted by the NMCS D Institutional Review Board.  
20  
21  
22  
23  
24  
25

## 26 Data Analysis

27  
28 The data collected (laboratory results, questionnaire responses, and medical record  
29  
30 information) were entered into a Microsoft Excel 2003 (Microsoft Corporation, Redmond, WA)  
31  
32 database and analyzed with SAS<sup>®</sup> version 9.2 (SAS Institute, Cary, NC).  
33  
34

35  
36 Prevalence Incidence rates were calculated for each type of infection (GC, CT, or both) at  
37  
38 each site. The descriptive statistics included for categorical variables were counts and  
39  
40 proportions, and means and standard deviations for continuous variables. Chi-square or  
41  
42 Fisher's exact tests were performed, as appropriate, to analyze the bivariate relationships  
43  
44 between the factors of interest and the outcome defined as being positive for either infection  
45  
46 (GC and/or CT in at least one site). Odds ratios (OR), 95% confidence intervals (CI), and *P*-  
47  
48 values were reported. *P*-values less than 0.05 were considered statistically significant.  
49  
50  
51  
52  
53  
54  
55  
56  
57  
58  
59  
60

## RESULTS

One hundred six consecutive patients were offered participation in the study, six declined, and one hundred were enrolled. One participant was later excluded due to recent treatment of asymptomatic rectal CT infection prior to enrollment. Due to scheduling conflicts and inability of participant to return to the clinic, and despite several attempts to do so, a urine specimen was not collected from 3 participants and rectal/pharyngeal swabs from 12. The cohort (n=99) included 79% who were MSM. The mean age of the cohort was 31 years, and race was reported as Black in 36%, Caucasian in 35%, Hispanic in 15%, and other in 13%. Sixty-seven percent were unmarried, and 36% had a previous history of STI. HIV-related characteristics included a mean CD4 count of 609 cells/mm<sup>3</sup>, 43% had an HIV viral load <48 copies/μL, 51% were receiving antiretroviral therapy, and the mean time since HIV diagnosis was 63 months. (Table 1)

Twenty-four percent had either GC or CT in at least 1 site. The site with the highest prevalenceincidence was the rectum (18.4%), followed by the pharynx (9.2%) and the urethra (1%). Of rectal swabs, 18% were positive for CT and 3% for GC. Of pharynx swabs, 8% were positive for GC and 2% for CT. Only one infection was detected in urine (GC). (Table 2)

Eighty-one percent of those with GC/CT infection had a positive screening test at only one site, 19% were positive at two sites, and none were positive at all three sites.

In bivariate analysis, anal sex (p=0.04), having a male partner (OR 7.02, p=0.04), and having sex at least once weekly (OR 3.28, p=0.04) were associated with infection; vaginal sex was protective (OR 0.20, p=0.03). Demographic factors associated with infection included age <35 years (OR 6.27, p=0.02), non-Caucasian ethnicity (Black OR 5.50, p=0.04; Hispanic OR 11.00, p=0.01; other race OR 7.33, p=0.03), <3 years since HIV diagnosis (OR 2.75, p=0.04), and previous STI (OR 5.10, p=0.001). (Table 3, 4)

1  
2  
3 Only about half of participants reported always using condoms during anal sex, and less than  
4  
5 half always required their partner to use condoms during anal sex. During oral sex, less than  
6  
7 15% of participants reported always using condoms and always requiring their partner to use  
8  
9 condoms. (Table 4)  
10

11  
12  
13  
14 With regards to relationship attitudes, 52% of participants reported sexual relations only with  
15  
16 a partner in a serious relationship, while 28% disagreed with this statement. Seventy-six  
17  
18 percent of participants expected monogamy in a serious relationship, while 14% disagreed  
19  
20 with this statement. Twenty-three percent of participants participated in most of their sexual  
21  
22 relations with casual friends and 53% disagreed with this statement. None of these beliefs  
23  
24 were significantly associated with infection. (Table 4)  
25  
26  
27  
28  
29  
30  
31  
32  
33  
34  
35  
36  
37  
38  
39  
40  
41  
42  
43  
44  
45  
46  
47  
48  
49  
50  
51  
52  
53  
54  
55  
56  
57  
58  
59  
60



## DISCUSSION

We found an alarming ~~prevalence~~incidence of GC/CT infection—nearly twice that of non-military MSM in other large California cities.[10] In fact, our ~~prevalence~~incidence may represent an underestimate, since some of our patients may seek screening (and subsequent therapy) at the local county STD clinic prior to their military encounter, due to fear of discipline or discharge.[26 27] We believe there are two important contributors to the high ~~prevalence~~incidence rates observed: DADT and the first-screen effect.

DADT likely contributed the most to undiagnosed infection. The American Medical Association posited that this military law compromised the medical care of gay patients serving in the military.[28] Prior to repeal, military healthcare providers often believed they could not ask, document, nor counsel about sexual behaviors or orientations for fear of revealing MSM practices of their patients that they believed would lead to adverse legal action. Therefore, risk would not have been assessed and the need for screening was unknown and did not occur. DADT also prevented patients from providing honest answers or reports of sexual practices, again for fear of adverse legal action. We started our study prior to the repeal because SECNAVINST 5300.30D (the document that governs management of HIV infection in the Navy and Marine Corps) offered protection against adverse action related to information obtained from a medical or epidemiologic interview. Unfortunately, this provision was not well known to military healthcare providers.

Second, our study facilitated the initiation of sexual risk driven screening for GC/CT infection in our healthcare facility. Hence, study data represent the first time most~~many~~ participants were screened for extragenital GC/CT infection. First-time screening for a condition may reveal more ~~prevalent~~incident cases than subsequent screening, especially in the case of

1 asymptomatic infection, and may partially explain why we detected higher  
2 prevalence incidence than that found in other California cities which may represent  
3  
4 subsequent screening data.  
5  
6  
7  
8

9  
10 Our study also had several important findings regarding HIV-positive men serving in the US  
11 military. With regards to sexual practices, most respondents were MSM and engaged in oral,  
12 anal (receptive and insertive), and oral-anal sex. As expected, most respondents do not use  
13 condoms during oral sex. Surprisingly though was that nearly half of respondents do not  
14 always use condoms or require their partners to use condoms during anal sex. Safer sex  
15 fatigue, serosorting, and seropositioning may be contributors to low rates of condom use.[29]  
16  
17 Regarding relationship attitudes, about half of respondents believe sexual relations should  
18 only occur with partners in a serious relationship while approximately one-quarter engage in  
19 sex with casual friends. When in a serious relationship, the majority of respondents expect  
20 monogamy.  
21  
22  
23  
24  
25  
26  
27  
28  
29  
30  
31  
32  
33  
34  
35

36 The significant findings noted in our study were not unexpected. MSM, anal sex, non-  
37 Caucasian ethnicity, and younger age were associated with GC/CT and have been identified  
38 as STI risk factors in other studies.[16 30-32] Also, it follows that a person who recently  
39 acquired HIV infection or has a history of STI would be at higher risk for GC/CT infection.  
40  
41 The increased risk among non-Caucasians may be related to cultural or societal stigma  
42 which may prevent an individual from seeking screening services (and need to disclose self-  
43 perceived taboo sexual behavior) in a way that DADT likely prevented military MSM from  
44 seeking or receiving appropriate screening.  
45  
46  
47  
48  
49  
50  
51  
52  
53  
54

55  
56 We acknowledge potential limitations of our study: those inherent to an observational design,  
57 inability to achieve 100% three site screening from all participants, and small study  
58  
59  
60

1 population. Although our sample size is small, it is worth noting that trends in our data are  
2 similar to trends noted in larger non-military studies of GC/CT infection: most infections were  
3 detected at extragenital sites, the majority of rectal infections were due to CT, and the  
4 majority of pharyngeal infections were due to GC. Finally, there may have been some  
5 reluctance of participants to answer survey questions honestly, although we believe this was  
6 minimized by our confidential survey procedures and as reflected by candid responses we  
7 did receive.  
8  
9  
10  
11  
12  
13  
14  
15  
16  
17  
18

19 We have generated the first comprehensive data set of asymptomatic GC/CT infection in a  
20 US military population. Although much of what we have learned was assumed to be true, this  
21 is the first systematic description and underscores the need for military healthcare providers  
22 to screen their MSM population for infection at three anatomic sites. Also, as noted in larger  
23 studies, we found that reliance on urine/urethral screening alone will fail to detect the vast  
24 majority of asymptomatic infections in an MSM population. Finally, low rates of reported  
25 condom use among HIV-positive participants signals the need to enhance safer sex  
26 prevention efforts among MSM.  
27  
28  
29  
30  
31  
32  
33  
34  
35  
36  
37  
38  
39

40 We hope the results of our pilot study will inform and motivate those who design larger,  
41 multisite STI clinical trials for the US military. Although our study was small, we can conclude  
42 that MSM make up a significant proportion of our HIV-infected population. DADT has been  
43 repealed and US Defense Secretary Panetta has mandated extension of military benefits to  
44 same sex partners.<sup>[33]</sup> Therefore, we believe it's also time to include MSM in our military  
45 research to enhance overall health.  
46  
47  
48  
49  
50  
51  
52  
53  
54  
55  
56  
57  
58  
59  
60

## TABLES

Table 1. HIV-infected male demographic characteristics, 2011—San Diego, California (n=99)

| HIV variables                              |             |
|--------------------------------------------|-------------|
| CD4 count mean (SD), cells/mm <sup>3</sup> | 609 (216)   |
| Suppressed HIV VL (<48 copies/μL)          | 43%         |
| Receiving ART                              | 51%         |
| Time since HIV diagnosis mean (SD), months | 62.8 (59.9) |
| Demographic variables                      |             |
| Age                                        |             |
| Mean (SD), years                           | 30.9 (8.2)  |
| <25 years                                  | 28%         |
| 25-34 years                                | 38%         |
| ≥ 35 years                                 | 33%         |
| Ethnicity                                  |             |
| Black                                      | 36%         |
| Caucasian                                  | 35%         |
| Hispanic                                   | 15%         |
| Other                                      | 13%         |
| Marital Status                             |             |
| Married                                    | 33%         |
| Single                                     | 67%         |
| Sexual Practice                            |             |
| MSM                                        | 79%         |
| MSW                                        | 21%         |
| Previous STI                               |             |
| Yes                                        | 36%         |

VL = plasma viral load

ART = antiretroviral therapy

MSM = men who have sex with men

MSW = men who have sex with women

SD = standard deviation

STI = sexually transmitted infection

Table 2. Prevalence of asymptomatic infection by anatomic site, HIV-infected men, 2011—San Diego, California (n=99)\*

|         | Either Infection |    |            | CT    |    |            | GC    |    |            |
|---------|------------------|----|------------|-------|----|------------|-------|----|------------|
|         | Cases            | N  | Prevalence | Cases | N  | Prevalence | Cases | N  | Prevalence |
|         |                  |    | Rate       |       |    | Rate       |       |    | Rate       |
| Overall | 20               | 83 | 24.1%      | 17    | 83 | 20.5%      | 8     | 83 | 9.6%       |
| Urethra | 1                | 96 | 1.0%       | 0     | 96 | 0.0%       | 1     | 96 | 1.0%       |
| Rectum  | 16               | 87 | 18.4%      | 16    | 87 | 18.4%      | 3     | 87 | 3.4%       |
| Pharynx | 8                | 87 | 9.2%       | 2     | 87 | 2.3%       | 7     | 87 | 8.0%       |

\*Some participants did not have screening at all three sites.

Table 3. Survey responses – demographic &amp; sexual practices by infection status, HIV-infected men, 2011—San Diego, California

|                                              | Total |        | CT and/or GC Infection |        | Neither infection |        | OR    | 95% CI      | p value <sup>a</sup> |
|----------------------------------------------|-------|--------|------------------------|--------|-------------------|--------|-------|-------------|----------------------|
|                                              | n     | (%)    | n                      | (%)    | n                 | (%)    |       |             |                      |
| <b>Demographic variables (N respondents)</b> |       |        |                        |        |                   |        |       |             |                      |
| Gender of sexual partner(s) (N=98)           |       |        |                        |        |                   |        |       |             |                      |
| Women only                                   | 21    | (21.4) | 1                      | (4.8)  | 20                | (26.0) | REF   | --          | --                   |
| Male (MSM)                                   | 77    | (78.6) | 20                     | (95.2) | 57                | (74.0) | 7.02  | 1.88, 55.72 | 0.04                 |
| Race/ethnicity (N=99)                        |       |        |                        |        |                   |        |       |             |                      |
| White                                        | 35    | (35.4) | 2                      | (9.5)  | 33                | (42.3) | REF   | --          | --                   |
| Black                                        | 36    | (36.4) | 9                      | (42.9) | 27                | (34.7) | 5.50  | 1.10, 27.64 | 0.04                 |
| Hispanic                                     | 15    | (15.2) | 6                      | (28.6) | 9                 | (11.5) | 11.00 | 1.89, 64.06 | 0.01                 |
| Other                                        | 13    | (13.0) | 4                      | (19.0) | 9                 | (11.5) | 7.33  | 1.15, 46.66 | 0.03                 |
| Age (N=99)                                   |       |        |                        |        |                   |        |       |             |                      |
| <35 years                                    | 66    | (66.7) | 19                     | (90.5) | 47                | (60.3) | 6.27  | 1.36, 28.82 | 0.02                 |
| ≥ 35 years                                   | 33    | (33.3) | 2                      | (9.5)  | 31                | (39.7) | REF   | --          | --                   |
| Previous history of STI (N=99)               |       |        |                        |        |                   |        |       |             |                      |
| No                                           | 63    | (63.6) | 7                      | (33.3) | 56                | (71.8) | REF   | --          | --                   |
| Yes                                          | 36    | (36.4) | 14                     | (66.7) | 22                | (28.2) | 5.10  | 1.81, 14.30 | 0.001                |
| Number of years since HIV diagnosis (N=99)   |       |        |                        |        |                   |        |       |             |                      |
| > 3 years                                    | 57    | (57.6) | 8                      | (38.1) | 49                | (62.8) | REF   | --          | --                   |
| ≤ 3 years                                    | 42    | (42.4) | 13                     | (61.9) | 29                | (37.2) | 2.75  | 1.02, 7.41  | 0.04                 |
| <b>Sexual practices (N respondents)</b>      |       |        |                        |        |                   |        |       |             |                      |
| Vaginal sex (N=99)                           |       |        |                        |        |                   |        |       |             |                      |
| No                                           | 70    | (70.7) | 19                     | (90.5) | 51                | (65.4) | REF   | --          | --                   |
| Yes                                          | 29    | (29.3) | 2                      | (9.5)  | 27                | (34.6) | 0.20  | 0.04, 0.92  | 0.03                 |
| Oral sex <sup>b</sup> (N=99)                 |       |        |                        |        |                   |        |       |             |                      |
| No                                           | 3     | (3.0)  | 0                      | (0)    | 3                 | (3.8)  | REF   | --          | --                   |
| Yes                                          | 96    | (97.0) | 21                     | (100)  | 75                | (96.2) | --    | --          | 1.00                 |
| Anal sex <sup>b</sup> (N=99)                 |       |        |                        |        |                   |        |       |             |                      |
| No                                           | 15    | (15.2) | 0                      | (0)    | 15                | (19.2) | REF   | --          | --                   |
| Yes                                          | 84    | (84.8) | 21                     | (100)  | 63                | (80.8) | --    | --          | 0.04                 |
| Insertive anal sex (N=80)                    |       |        |                        |        |                   |        |       |             |                      |
| No                                           | 15    | (18.8) | 5                      | (23.8) | 10                | (16.9) | 1.00  | --          | --                   |
| Yes                                          | 65    | (81.2) | 16                     | (76.2) | 49                | (83.1) | 0.65  | 0.19, 2.20  | 0.52                 |
| Receptive anal sex (N=80)                    |       |        |                        |        |                   |        |       |             |                      |
| No                                           | 17    | (21.3) | 2                      | (9.5)  | 15                | (25.4) | REF   | --          | --                   |
| Yes                                          | 63    | (78.7) | 19                     | (90.5) | 44                | (74.6) | 3.32  | 0.67, 15.57 | 0.21                 |

<sup>a</sup>Fisher's exact test was performed for variables with expected cell frequencies <5, otherwise a Chi-square test was performed.

<sup>b</sup>Odds ratios and 95% confidence intervals not available due to one or more zero cells.

MSM = men who have sex with men (self-reported).

Oral and oral-anal sex were not significantly associated with infection with p>0.05

Table 4. Survey responses – relationship attitudes &amp; condom use by infection status, HIV-infected men, 2011—San Diego, California

|                                                                     | Total |        | CT and/or GC Infection |        | Neither infection |        | OR   | 95% CI      | p value <sup>a</sup> |
|---------------------------------------------------------------------|-------|--------|------------------------|--------|-------------------|--------|------|-------------|----------------------|
|                                                                     | n     | (%)    | n                      | (%)    | n                 | (%)    |      |             |                      |
| <b>Relationship attitudes (N respondents)</b>                       |       |        |                        |        |                   |        |      |             |                      |
| Sexual relationships with >1 partner in the past year (N=99)        |       |        |                        |        |                   |        |      |             |                      |
| No                                                                  | 39    | (39.4) | 5                      | (23.8) | 34                | (43.6) | REF  | --          | --                   |
| Yes                                                                 | 60    | (60.6) | 16                     | (76.2) | 44                | (56.4) | 2.47 | 0.82, 7.42  | 0.10                 |
| Frequency of sexual activity in the past year (N=99)                |       |        |                        |        |                   |        |      |             |                      |
| < Once a week                                                       | 38    | (38.4) | 4                      | (19.0) | 34                | (43.6) | REF  | --          | --                   |
| At least once a week                                                | 61    | (61.6) | 17                     | (81.0) | 44                | (56.4) | 3.28 | 1.01, 10.66 | 0.04                 |
| Sexual relations only with partner in a serious relationship (N=99) |       |        |                        |        |                   |        |      |             |                      |
| Strongly agree                                                      | 51    | (51.5) | 7                      | (33.3) | 44                | (56.4) | REF  | --          | --                   |
| Neither agree/disagree                                              | 20    | (20.2) | 5                      | (23.8) | 15                | (19.2) | 2.10 | 0.59, 7.60  | 0.26                 |
| Strongly disagree                                                   | 28    | (28.3) | 9                      | (42.9) | 19                | (24.4) | 2.98 | 0.97, 9.17  | 0.06                 |
| Expect monogamy in a serious relationship (N=99)                    |       |        |                        |        |                   |        |      |             |                      |
| Strongly agree                                                      | 75    | (75.8) | 14                     | (66.7) | 61                | (78.1) | REF  | --          | --                   |
| Neither agree/disagree                                              | 10    | (10.1) | 3                      | (14.3) | 7                 | (9.0)  | 1.87 | 0.43, 8.14  | 0.41                 |
| Strongly disagree                                                   | 14    | (14.1) | 4                      | (19.0) | 10                | (12.9) | 1.74 | 0.48, 6.38  | 0.40                 |
| Sexual activities mostly with casual friends (N=99)                 |       |        |                        |        |                   |        |      |             |                      |
| Strongly disagree                                                   | 52    | (53.0) | 8                      | (38.0) | 44                | (57.2) | REF  | --          | --                   |
| Neither agree/disagree                                              | 24    | (24.5) | 9                      | (43.0) | 15                | (19.5) | 3.30 | 1.08, 10.10 | 0.04                 |
| Strongly agree                                                      | 22    | (22.5) | 4                      | (19.0) | 18                | (23.3) | 1.22 | 0.33, 4.57  | 0.77                 |
| <b>Condom use (N respondents)</b>                                   |       |        |                        |        |                   |        |      |             |                      |
| Self-condom use during oral sex (N=92)                              |       |        |                        |        |                   |        |      |             |                      |
| Always                                                              | 12    | (13.0) | 4                      | (20.0) | 8                 | (11.1) | REF  | --          | --                   |
| Do not always                                                       | 80    | (87.0) | 16                     | (80.0) | 64                | (88.9) | 0.50 | 0.13, 1.87  | 0.29                 |
| Partner-condom use during oral sex (N=90)                           |       |        |                        |        |                   |        |      |             |                      |
| Always                                                              | 13    | (14.4) | 4                      | (19.0) | 9                 | (13.0) | REF  | --          | --                   |
| Do not always                                                       | 77    | (85.6) | 17                     | (81.0) | 60                | (87.0) | 0.64 | 0.17, 2.34  | 0.49                 |
| Self-condom use during anal sex (N=82)                              |       |        |                        |        |                   |        |      |             |                      |
| Always                                                              | 42    | (51.2) | 9                      | (45.0) | 33                | (53.2) | REF  | --          | --                   |
| Do not always                                                       | 40    | (48.8) | 11                     | (55.0) | 29                | (46.8) | 1.39 | 0.51, 3.83  | 0.52                 |
| Partner-condom use during anal sex (N=80)                           |       |        |                        |        |                   |        |      |             |                      |
| Always                                                              | 37    | (46.2) | 8                      | (38.1) | 29                | (49.2) | REF  | --          | --                   |
| Do not always                                                       | 43    | (53.8) | 13                     | (61.9) | 30                | (50.8) | 1.57 | 0.57, 4.35  | 0.38                 |

<sup>a</sup>Fisher's exact test was performed for variables with expected cell frequencies <5, otherwise a Chi-square test was performed.

<sup>b</sup>Odds ratios and 95% confidence intervals not available due to one or more zero cells.

**LICENSE FOR PUBLICATION STATEMENT**

The Corresponding Author has the right to grant on behalf of all authors and does grant on behalf of all authors, an exclusive license (or non-exclusive for government employees) on a worldwide basis to the BMJ Group and co-owners or contracting owning societies (where published by the BMJ Group on their behalf), and its Licensees to permit this article (if accepted) to be published in Sexually Transmitted Infections and any other BMJ Group products and to exploit all subsidiary rights, as set out in our license.

**CONTRIBUTORSHIP STATEMENT**

Robert J. Carpenter contributed to conception and design, acquisition of data, and analysis and interpretation of data, participated in drafting the article or revising it critically for important intellectual content, and was involved in final approval of the version to be published.

All other authors listed contributed to acquisition of data, participated in drafting the article or revising it critically for important intellectual content, and were involved in final approval of the version to be published.

**DATA SHARING STATEMENT**

No additional data available.

## REFERENCES

1. Cohen MS, Hoffman IF, Royce RA, et al. Reduction of concentration of HIV-1 in semen after treatment of urethritis: implications for prevention of sexual transmission of HIV-1. *AIDSCAP Malawi Research Group. Lancet* 1997;**349**(9069):1868-73
2. Galvin SR, Cohen MS. The role of sexually transmitted diseases in HIV transmission. *Nature reviews. Microbiology* 2004;**2**(1):33-42 doi: 10.1038/nrmicro794[published Online First: Epub Date]].
3. Vernazza PL, Eron JJ, Fiscus SA, Cohen MS. Sexual transmission of HIV: infectiousness and prevention. *Aids* 1999;**13**(2):155-66
4. Workowski KA, Berman S. Sexually transmitted diseases treatment guidelines, 2010. *MMWR Recomm Rep* 2010;**59**(RR-12):1-110
5. Park J, Marcus JL, Pandori M, Snell A, Philip SS, Bernstein KT. Sentinel surveillance for pharyngeal chlamydia and gonorrhea among men who have sex with men--San Francisco, 2010. *Sexually transmitted diseases* 2012;**39**(6):482-4 doi: 10.1097/OLQ.0b013e3182495e2f[published Online First: Epub Date]].
6. Hoover KW, Butler M, Workowski K, et al. STD screening of HIV-infected MSM in HIV clinics. *Sexually transmitted diseases* 2010;**37**(12):771-6 doi: 10.1097/OLQ.0b013e3181e50058[published Online First: Epub Date]].
7. Schachter J, Moncada J, Liska S, Shayevich C, Klausner JD. Nucleic acid amplification tests in the diagnosis of chlamydial and gonococcal infections of the oropharynx and rectum in men who have sex with men. *Sexually transmitted diseases* 2008;**35**(7):637-42 doi: 10.1097/OLQ.0b013e31817bdd7e[published Online First: Epub Date]].
8. Rieg G, Lewis RJ, Miller LG, Witt MD, Guerrero M, Daar ES. Asymptomatic sexually transmitted infections in HIV-infected men who have sex with men: prevalence, incidence, predictors, and screening strategies. *AIDS patient care and STDs* 2008;**22**(12):947-54 doi: 10.1089/apc.2007.0240[published Online First: Epub Date]].
9. Geisler WM, Whittington WL, Suchland RJ, Stamm WE. Epidemiology of anorectal chlamydial and gonococcal infections among men having sex with men in Seattle: utilizing serovar and auxotype strain typing. *Sexually transmitted diseases* 2002;**29**(4):189-95
10. Kent CK, Chaw JK, Wong W, et al. Prevalence of rectal, urethral, and pharyngeal chlamydia and gonorrhea detected in 2 clinical settings among men who have sex with men: San Francisco, California, 2003. *Clinical infectious diseases : an official publication of the Infectious Diseases Society of America* 2005;**41**(1):67-74 doi: CID35177 [pii] 10.1086/430704[published Online First: Epub Date]].
11. Burrelli DF. "Don't Ask, Don't Tell": The Law and Military Policy on Same-Sex Behavior. Secondary "Don't Ask, Don't Tell": The Law and Military Policy on Same-Sex Behavior 2010. <http://www.fas.org/sgp/crs/misc/R40782.pdf>.
12. Miller WC, Zenilman JM. Epidemiology of chlamydial infection, gonorrhea, and trichomoniasis in the United States--2005. *Infect Dis Clin North Am* 2005;**19**(2):281-96 doi: S0891-5520(05)00032-2 [pii] 10.1016/j.idc.2005.04.001[published Online First: Epub Date]].
13. Mimiaga MJ, Helms DJ, Reisner SL, et al. Gonococcal, chlamydia, and syphilis infection positivity among MSM attending a large primary care clinic, Boston, 2003 to 2004. *Sexually transmitted diseases* 2009;**36**(8):507-11 doi: 10.1097/OLQ.0b013e3181a2ad98[published Online First: Epub Date]].
14. Phipps W, Stanley H, Kohn R, Stansell J, Klausner JD. Syphilis, chlamydia, and gonorrhea screening in HIV-infected patients in primary care, San Francisco, California, 2003. *AIDS patient care and STDs* 2005;**19**(8):495-8 doi: 10.1089/apc.2005.19.495[published Online First: Epub Date]].
15. Rietmeijer CA, Patnaik JL, Judson FN, Douglas JM, Jr. Increases in gonorrhea and sexual risk behaviors among men who have sex with men: a 12-year trend analysis at the Denver Metro Health Clinic. *Sexually transmitted diseases* 2003;**30**(7):562-7
16. Spaulding AB, Lifson AR, Iverson ER, et al. Gonorrhoea or chlamydia in a U.S. military HIV-positive cohort. *Sexually transmitted infections* 2012;**88**(4):266-71 doi: 10.1136/sextrans-2011-050173[published Online First: Epub Date]].



- 1 17. Aldous WK, Robertson JL, Robinson BJ, et al. Rates of gonorrhoea and Chlamydia in U.S. military personnel  
2 deployed to Iraq and Afghanistan (2004-2009). *Military medicine* 2011;**176**(6):705-10
- 3 18. Brodine SK, Shafer MA, Shaffer RA, et al. Asymptomatic sexually transmitted disease prevalence in four  
4 military populations: application of DNA amplification assays for Chlamydia and gonorrhoea screening.  
5 *The Journal of infectious diseases* 1998;**178**(4):1202-4
- 6 19. Sena AC, Miller WC, Hoffman IF, et al. Trends of gonorrhoea and chlamydial infection during 1985-1996  
7 among active-duty soldiers at a United States Army installation. *Clinical infectious diseases : an official*  
8 *publication of the Infectious Diseases Society of America* 2000;**30**(4):742-8 doi:  
9 10.1086/313742[published Online First: Epub Date]].
- 10 20. Cecil JA, Howell MR, Tawes JJ, et al. Features of Chlamydia trachomatis and Neisseria gonorrhoeae  
11 infection in male Army recruits. *The Journal of infectious diseases* 2001;**184**(9):1216-9 doi:  
12 10.1086/323662[published Online First: Epub Date]].
- 13 21. Zenilman JM, Glass G, Shields T, Jenkins PR, Gaydos JC, McKee KT, Jr. Geographic epidemiology of  
14 gonorrhoea and chlamydia on a large military installation: application of a GIS system. *Sexually*  
15 *transmitted infections* 2002;**78**(1):40-4
- 16 22. Shafer MA, Boyer CB, Shaffer RA, Schachter J, Ito SI, Brodine SK. Correlates of sexually transmitted diseases  
17 in a young male deployed military population. *Military medicine* 2002;**167**(6):496-500
- 18 23. Arcari CM, Gaydos JC, Howell MR, McKee KT, Gaydos CA. Feasibility and short-term impact of linked  
19 education and urine screening interventions for Chlamydia and gonorrhoea in male army recruits.  
20 *Sexually transmitted diseases* 2004;**31**(7):443-7
- 21 24. Wood BJ, Gaydos JC, McKee KT, Jr., Gaydos CA. Comparison of the urine Leukocyte Esterase Test to a  
22 Nucleic Acid Amplification Test for screening non-health care-seeking male soldiers for Chlamydia  
23 trachomatis and Neisseria gonorrhoeae infections. *Military medicine* 2007;**172**(7):770-2
- 24 25. Crum NF, Grillo M, Wallace MR. HIV care in the U.S. Navy: a multidisciplinary approach. *Military medicine*  
25 **2005**;**170**(12):1019-25
- 26 26. Katz KA. Health hazards of "don't ask, don't tell". *N Engl J Med* 2010;**363**(25):2380-1 doi:  
27 10.1056/NEJMp1012496[published Online First: Epub Date]].
- 28 27. Smith DM. Active duty military personnel presenting for care at a Gay Men's Health Clinic. *J Homosex*  
29 **2008**;**54**(3):277-9 doi: 10.1080/00918360801982173[published Online First: Epub Date]].
- 30 28. O'Reilly KB. AMA meeting: "Don't ask, don't tell" said to hurt patient care; repeal urged. *Secondary AMA*  
31 *meeting: "Don't ask, don't tell" said to hurt patient care; repeal urged* 2009. [http://www.ama-](http://www.ama-assn.org/amednews/2009/11/23/prsc1123.htm)  
32 [assn.org/amednews/2009/11/23/prsc1123.htm](http://www.ama-assn.org/amednews/2009/11/23/prsc1123.htm).
- 33 29. McFarland W, Chen YH, Nguyen B, et al. Behavior, intention or chance? A longitudinal study of HIV  
34 seroadaptive behaviors, abstinence and condom use. *AIDS Behav* 2012;**16**(1):121-31 doi:  
35 10.1007/s10461-011-9936-8[published Online First: Epub Date]].
- 36 30. Mustanski BS, Newcomb ME, Du Bois SN, Garcia SC, Grov C. HIV in young men who have sex with men: a  
37 review of epidemiology, risk and protective factors, and interventions. *J Sex Res* 2011;**48**(2-3):218-53  
38 doi: 10.1080/00224499.2011.558645[published Online First: Epub Date]].
- 39 31. Newman LM, Berman SM. Epidemiology of STD disparities in African American communities. *Sexually*  
40 *transmitted diseases* 2008;**35**(12 Suppl):S4-12 doi: 10.1097/OLQ.0b013e31818eb90e[published Online  
41 *First: Epub Date*]].
- 42 32. Wolitski RJ, Fenton KA. Sexual health, HIV, and sexually transmitted infections among gay, bisexual, and  
43 other men who have sex with men in the United States. *AIDS Behav* 2011;**15** Suppl 1:S9-17 doi:  
44 10.1007/s10461-011-9901-6[published Online First: Epub Date]].
- 45 33. Panetta L. Memorandum for Secretaries of the Military Departments Acting Under Secretary of Defense for  
46 Personnel and Readiness. *Secondary Memorandum for Secretaries of the Military Departments Acting*  
47 *Under Secretary of Defense for Personnel and Readiness* 2013. [http://www.defense.gov/news/Same-](http://www.defense.gov/news/Same-SexBenefitsMemo.pdf)  
48 [SexBenefitsMemo.pdf](http://www.defense.gov/news/Same-SexBenefitsMemo.pdf).

STROBE Statement—Checklist of items that should be included in reports of *cohort studies*

|                              | Item No | Recommendation                                                                                                                                                                                                                                                                                                                                                                                                |
|------------------------------|---------|---------------------------------------------------------------------------------------------------------------------------------------------------------------------------------------------------------------------------------------------------------------------------------------------------------------------------------------------------------------------------------------------------------------|
| <b>Title and abstract</b>    | 1       | (a) Indicate the study's design with a commonly used term in the title or the abstract<br>(b) Provide in the abstract an informative and balanced summary of what was done and what was found                                                                                                                                                                                                                 |
| <b>Introduction</b>          |         |                                                                                                                                                                                                                                                                                                                                                                                                               |
| Background/rationale         | 2       | Explain the scientific background and rationale for the investigation being reported                                                                                                                                                                                                                                                                                                                          |
| Objectives                   | 3       | State specific objectives, including any prespecified hypotheses                                                                                                                                                                                                                                                                                                                                              |
| <b>Methods</b>               |         |                                                                                                                                                                                                                                                                                                                                                                                                               |
| Study design                 | 4       | Present key elements of study design early in the paper                                                                                                                                                                                                                                                                                                                                                       |
| Setting                      | 5       | Describe the setting, locations, and relevant dates, including periods of recruitment, exposure, follow-up, and data collection                                                                                                                                                                                                                                                                               |
| Participants                 | 6       | (a) Give the eligibility criteria, and the sources and methods of selection of participants. Describe methods of follow-up<br>(b) For matched studies, give matching criteria and number of exposed and unexposed                                                                                                                                                                                             |
| Variables                    | 7       | Clearly define all outcomes, exposures, predictors, potential confounders, and effect modifiers. Give diagnostic criteria, if applicable                                                                                                                                                                                                                                                                      |
| Data sources/<br>measurement | 8*      | For each variable of interest, give sources of data and details of methods of assessment (measurement). Describe comparability of assessment methods if there is more than one group                                                                                                                                                                                                                          |
| Bias                         | 9       | Describe any efforts to address potential sources of bias                                                                                                                                                                                                                                                                                                                                                     |
| Study size                   | 10      | Explain how the study size was arrived at                                                                                                                                                                                                                                                                                                                                                                     |
| Quantitative variables       | 11      | Explain how quantitative variables were handled in the analyses. If applicable, describe which groupings were chosen and why                                                                                                                                                                                                                                                                                  |
| Statistical methods          | 12      | (a) Describe all statistical methods, including those used to control for confounding<br>(b) Describe any methods used to examine subgroups and interactions<br>(c) Explain how missing data were addressed<br>(d) If applicable, explain how loss to follow-up was addressed<br>(e) Describe any sensitivity analyses                                                                                        |
| <b>Results</b>               |         |                                                                                                                                                                                                                                                                                                                                                                                                               |
| Participants                 | 13*     | (a) Report numbers of individuals at each stage of study—eg numbers potentially eligible, examined for eligibility, confirmed eligible, included in the study, completing follow-up, and analysed<br>(b) Give reasons for non-participation at each stage<br>(c) Consider use of a flow diagram                                                                                                               |
| Descriptive data             | 14*     | (a) Give characteristics of study participants (eg demographic, clinical, social) and information on exposures and potential confounders<br>(b) Indicate number of participants with missing data for each variable of interest<br>(c) Summarise follow-up time (eg, average and total amount)                                                                                                                |
| Outcome data                 | 15*     | Report numbers of outcome events or summary measures over time                                                                                                                                                                                                                                                                                                                                                |
| Main results                 | 16      | (a) Give unadjusted estimates and, if applicable, confounder-adjusted estimates and their precision (eg, 95% confidence interval). Make clear which confounders were adjusted for and why they were included<br>(b) Report category boundaries when continuous variables were categorized<br>(c) If relevant, consider translating estimates of relative risk into absolute risk for a meaningful time period |

|    |                          |    |                                                                                                                                                                            |
|----|--------------------------|----|----------------------------------------------------------------------------------------------------------------------------------------------------------------------------|
| 1  | Other analyses           | 17 | Report other analyses done—eg analyses of subgroups and interactions, and sensitivity analyses                                                                             |
| 2  |                          |    |                                                                                                                                                                            |
| 3  |                          |    |                                                                                                                                                                            |
| 4  | <b>Discussion</b>        |    |                                                                                                                                                                            |
| 5  | Key results              | 18 | Summarise key results with reference to study objectives                                                                                                                   |
| 6  | Limitations              | 19 | Discuss limitations of the study, taking into account sources of potential bias or imprecision. Discuss both direction and magnitude of any potential bias                 |
| 7  |                          |    |                                                                                                                                                                            |
| 8  | Interpretation           | 20 | Give a cautious overall interpretation of results considering objectives, limitations, multiplicity of analyses, results from similar studies, and other relevant evidence |
| 9  |                          |    |                                                                                                                                                                            |
| 10 | Generalisability         | 21 | Discuss the generalisability (external validity) of the study results                                                                                                      |
| 11 |                          |    |                                                                                                                                                                            |
| 12 | <b>Other information</b> |    |                                                                                                                                                                            |
| 13 |                          |    |                                                                                                                                                                            |
| 14 | Funding                  | 22 | Give the source of funding and the role of the funders for the present study and, if applicable, for the original study on which the present article is based              |
| 15 |                          |    |                                                                                                                                                                            |
| 16 |                          |    |                                                                                                                                                                            |

\*Give information separately for exposed and unexposed groups.

**Note:** An Explanation and Elaboration article discusses each checklist item and gives methodological background and published examples of transparent reporting. The STROBE checklist is best used in conjunction with this article (freely available on the Web sites of PLoS Medicine at <http://www.plosmedicine.org/>, Annals of Internal Medicine at <http://www.annals.org/>, and Epidemiology at <http://www.epidem.com/>). Information on the STROBE Initiative is available at <http://www.strobe-statement.org>.



**Incidence and Factors Associated with Asymptomatic  
Gonococcal and Chlamydial Infection among US Navy and  
Marine Corps Men Infected With the Human  
Immunodeficiency Virus**

|                                 |                                                                                                                                                                                                                                                                                                                                                                                                                                                                                                                                                                                                                                                                                                                                                                                                                                             |
|---------------------------------|---------------------------------------------------------------------------------------------------------------------------------------------------------------------------------------------------------------------------------------------------------------------------------------------------------------------------------------------------------------------------------------------------------------------------------------------------------------------------------------------------------------------------------------------------------------------------------------------------------------------------------------------------------------------------------------------------------------------------------------------------------------------------------------------------------------------------------------------|
| Journal:                        | <i>BMJ Open</i>                                                                                                                                                                                                                                                                                                                                                                                                                                                                                                                                                                                                                                                                                                                                                                                                                             |
| Manuscript ID:                  | bmjopen-2013-002775.R2                                                                                                                                                                                                                                                                                                                                                                                                                                                                                                                                                                                                                                                                                                                                                                                                                      |
| Article Type:                   | Research                                                                                                                                                                                                                                                                                                                                                                                                                                                                                                                                                                                                                                                                                                                                                                                                                                    |
| Date Submitted by the Author:   | 05-Apr-2013                                                                                                                                                                                                                                                                                                                                                                                                                                                                                                                                                                                                                                                                                                                                                                                                                                 |
| Complete List of Authors:       | Carpenter, Robert; Naval Medical Center San Diego, Infectious Diseases Refugio, Oliver; San Diego State University, Graduate School of Public Health<br>Adams, Nehkonti; Naval Medical Center San Diego, Infectious Diseases<br>O'Brien, Kevin; Naval Medical Center San Diego, Infectious Diseases<br>Johnson, Mark; Naval Medical Center San Diego, Infectious Diseases<br>Groff, Harold; Naval Medical Center San Diego, Infectious Diseases<br>Maves, Ryan; Naval Medical Center San Diego, Infectious Diseases<br>Bavaro, Mary; Naval Medical Center San Diego, Infectious Diseases;<br>Uniformed Services University of the Health Sciences, Infectious Disease Clinical Research Program<br>Crum-Cianflone, Nancy; Naval Medical Center San Diego, Infectious Diseases; San Diego State University, Graduate School of Public Health |
| <b>Primary Subject Heading</b>: | Infectious diseases                                                                                                                                                                                                                                                                                                                                                                                                                                                                                                                                                                                                                                                                                                                                                                                                                         |
| Secondary Subject Heading:      | Sexual health, HIV/AIDS                                                                                                                                                                                                                                                                                                                                                                                                                                                                                                                                                                                                                                                                                                                                                                                                                     |
| Keywords:                       | HIV & AIDS < INFECTIOUS DISEASES, Molecular diagnostics < INFECTIOUS DISEASES, gonorrhea, chlamydia, DADT, MSM                                                                                                                                                                                                                                                                                                                                                                                                                                                                                                                                                                                                                                                                                                                              |
|                                 |                                                                                                                                                                                                                                                                                                                                                                                                                                                                                                                                                                                                                                                                                                                                                                                                                                             |

SCHOLARONE™  
Manuscripts

**Title: Incidence and Factors Associated with Asymptomatic Gonococcal and Chlamydial Infection among US Navy and Marine Corps Men Infected With the Human Immunodeficiency Virus**

**Running Title: HIV and gonococcal/chlamydial infection in US Navy and Marine Corps men**

**Authors:**

1. Robert J. Carpenter, DO, FACP (**corresponding author**)
  - a. Affiliation: Division of Infectious Diseases, Naval Medical Center San Diego
  - b. Position: Infectious Diseases Staff Physician
  - c. Address: 34800 Bob Wilson Drive, San Diego, CA, 92134
  - d. Phone: 619-532-7475
  - e. Fax: 619-532-7478
  - f. Email: rjc311@gmail.com
2. Oliver N. Refugio, MPH
  - a. Affiliation: Graduate School of Public Health, San Diego State University, San Diego, CA
3. Nehkonti Adams, MD
  - a. Affiliation: Division of Infectious Diseases, Naval Medical Center San Diego, San Diego, CA
4. Kevin P. O'Brien
  - a. Affiliation: Division of Infectious Diseases, Naval Medical Center San Diego, San Diego, CA
5. Mark D. Johnson, MD MTM&H
  - a. Affiliation: Division of Infectious Diseases, Naval Medical Center San Diego, San Diego, CA
6. Harold L. Groff, MD MPH
  - a. Affiliation: Division of Infectious Diseases, Naval Medical Center San Diego, San Diego, CA
7. Ryan C. Maves, MD
  - a. Affiliation: Division of Infectious Diseases, Naval Medical Center San Diego, San Diego, CA
8. Mary F. Bavaro, MD
  - a. Affiliation: Division of Infectious Diseases, Naval Medical Center San Diego, San Diego, CA
9. Nancy F. Crum-Cianflone, MD MPH
  - a. Affiliation: Division of Infectious Diseases, Naval Medical Center San Diego, San Diego, CA; Graduate School of Public Health, San Diego State University, San Diego, CA; Naval Health Research Center, San Diego, CA

**Word Count: 2012**

**Conflict of Interest:** There are no conflicts of interest to report. The authors have received no financial support for this manuscript.

**Key words:** HIV, gonorrhoea, Chlamydia, military, MSM, "don't ask, don't tell", DADT

**Disclosure:** The views expressed in this manuscript are those of the authors and do not necessarily reflect the official policy or position of the Department of the Navy, Department of Defense, nor the U.S. Government.

## ARTICLE SUMMARY

### FOCUS

- Is asymptomatic gonorrhoea and chlamydia infection prevalent among US military men with HIV?
- If so, are those infections associated with any specific sexual practice or relationship beliefs?

### KEY MESSAGES

- Men who have sex with men (MSM) in the US military are at risk for asymptomatic gonorrhoea and chlamydia infection, predominantly at extragenital sites.
- Sex with men, anal sex, non-Caucasian ethnicity, age <35 years, and HIV infection for <3 years were all associated with asymptomatic infection.
- Repeal of DADT fostered a change in US military medical culture, allowing clinicians to counsel and screen MSM according to established guidelines.

### STRENGTHS

- First comprehensive data set of asymptomatic gonorrhoea/chlamydia infection in a male US military population previously infected with HIV.
- First study to describe health needs of men who have sex with men in a US military population.

### WEAKNESSES

- Observational study
- Small n (pilot study)
- Inability to obtain 3 site anatomic screening from all participants

**ABSTRACT:**

Objectives: *Neisseria gonorrhoeae* (GC) and *Chlamydia trachomatis* (CT) can facilitate transmission of HIV. Men who have sex with men (MSM) may harbor infections at genital and extragenital sites. Data regarding extragenital GC and CT infections in military populations are lacking. We examined the incidence and factors associated with asymptomatic GC and CT infection among this category of HIV-infected military personnel.

Methods: Cross-sectional pilot study of asymptomatic men who underwent nucleic acid amplification screening for GC and CT of the pharynx, rectum, and urine at a single military treatment facility in San Diego, CA. Inclusion criteria: male, HIV-infected, Department of Defense beneficiary. Exclusion criteria: any symptom related to urethra, pharynx, or rectum. One participant was also excluded for recent CT treatment. Data on demographics, sexual practices, and HIV variables were collected. Factors associated with infection were analyzed using chi-square tests.

Results: Ninety-nine HIV-positive men were evaluated - 79% MSM, mean age 31 years, 36% Black, and 33% married. Twenty-four percent were infected with either GC or CT. Rectal swabs were positive in 18% for CT and 3% for GC; pharynx swabs were positive in 8% for GC and 2% for CT. Only 1 infection was detected in urine (GC). Anal sex ( $p=0.04$ ), male partner (OR 7.02,  $p=0.04$ ), and sex at least once weekly (OR 3.28,  $p=0.04$ ) were associated with infection. Associated demographic included age  $<35$  years (OR 6.27,  $p=0.02$ ), non-Caucasian ethnicity ( $p=0.03$ ),  $<3$  years since HIV diagnosis (OR 2.75,  $p=0.04$ ), and previous STI (OR 5.10,  $p=0.001$ ).

Conclusions: We found a high incidence of extragenital GC/CT infection among HIV-infected military men. Only one infection was detected in the urine, signaling the need for aggressive three site screening of MSM. Clinicians should be aware of high incidence in order to enhance health through comprehensive STI screening practices.

## INTRODUCTION

*Neisseria gonorrhoeae* (GC) and *Chlamydia trachomatis* (CT) may cause infection in the male urethral, pharyngeal, and rectal mucosa, facilitating transmission of the human immunodeficiency virus (HIV).[1-3] Men who have sex with men (MSM) are at particular risk for harboring these infections at extragenital sites.[4-10] The institution of the United States (US) law, 'don't ask, don't tell' (DADT), allowed gay persons to serve in the military but made it unlawful for a service member to reveal his/her sexual orientation. Until its repeal in 2011, nearly 14,000 qualified service members were separated from the military.[11] Although there are several published reports regarding GC/CT infections in MSM, limited data existed among US military members.[7 9 10 12-15] Since 1986, the US military maintains a natural history study of HIV-infected persons receiving military healthcare and reports of GC/CT infection status in this cohort have been published.[16] Several other reports document GC/CT infections in US military men.[17-24] However, because of the DADT policy these reports could not represent the full spectrum of GC/CT infection in a military MSM population because they only included data from urine/urethra specimens. Presently, extragenital anatomic site data and comprehensive sexual practices and behaviors may now be reported.

The Naval Medical Center San Diego (NMCSD) is one of three US Navy HIV Evaluation and Treatment Units and provides health care to approximately 575 HIV-infected Department of Defense beneficiaries, approximately half of whom are currently serving on active military duty. Services offered include comprehensive primary and subspecialty health care, mental health services, prevention counseling and health promotion, and HIV and other sexually transmitted infection (STI) screening and management.[25] However, three anatomic site GC/CT screening was not routinely performed in any US Navy medical treatment facility prior to this study.



1  
2  
3 Given the lack of data on asymptomatic GC and CT infection among a US military cohort of  
4  
5 HIV-infected men, we conducted a cross-sectional pilot study with the objectives: (1) to  
6  
7 describe the incidence of asymptomatic urethral, pharyngeal, and rectal GC/CT infection in  
8  
9 this population; (2) to identify specific sexual behaviors, relationship attitudes, and HIV  
10  
11 disease attributes among this cohort; and (3) to determine specific factors associated with  
12  
13 asymptomatic GC/CT infections.  
14  
15

## 16 17 **MATERIALS AND METHODS**

### 18 19 **Participants and Procedures**

20  
21 All HIV-infected US Navy and Marine Corps members serving on active duty are required to  
22  
23 participate in a biannual medical and psychosocial evaluation. Those serving at military  
24  
25 bases in the western US and Pacific Basin report to NMCS D for these visits. Beginning in  
26  
27 September 2010, we presented the study to each consecutive military member presenting for  
28  
29 required HIV evaluation until we enrolled 100 participants. The study was designed as a pilot  
30  
31 to guide design of future research. No incentive to participation was offered. Those who  
32  
33 participated did so to optimize personal sexual health through more thorough STI screening.  
34  
35 Inclusion criteria included: male gender, HIV-infected, receiving care at the NMCS D, and  
36  
37 having no current symptoms referable to the pharynx, urethra, or rectum on the day of  
38  
39 enrollment. Study participants completed a short questionnaire regarding sexual practices  
40  
41 and relationship attitudes. In order to encourage honest responses, the written questionnaire  
42  
43 was administered by the clinic's non-military preventive medicine counselor and all responses  
44  
45 were confidentially maintained.  
46  
47  
48  
49  
50  
51

52  
53  
54 Each participant was screened for asymptomatic GC/CT infection of the urethra, pharynx,  
55  
56 and rectum using a first-void urine sample and posterior pharyngeal and rectal swabs  
57  
58 obtained by their primary HIV provider during their routine, biannual HIV clinic visit. All  
59  
60

1 collected specimens were collected on the day the questionnaire was completed and any  
2 infections were appropriately treated. The NMCS D laboratory previously validated the  
3 APTIMA Combo2<sup>®</sup> Assay (Gen-Probe Inc., San Diego, CA) for testing pharyngeal and rectal  
4 specimens according to Clinical Laboratory Improvement Amendments (CLIA) standard Sec  
5 493.1253. Medical records were reviewed by an HIV clinician and data regarding  
6  
7 demographics, prior STIs, and HIV-related data were collected. This study was previously  
8 approved with a waiver of informed consent granted by the NMCS D Institutional Review  
9 Board.  
10  
11  
12  
13  
14  
15  
16  
17  
18  
19  
20

## 21 **Data Analysis**

22 The data collected (laboratory results, questionnaire responses, and medical record  
23 information) were entered into a Microsoft Excel 2003 (Microsoft Corporation, Redmond, WA)  
24 database and analyzed with SAS<sup>®</sup> version 9.2 (SAS Institute, Cary, NC). Incidence rates  
25 were calculated for each type of infection (GC, CT, or both) at each site. The descriptive  
26 statistics included for categorical variables were counts and proportions, and means and  
27 standard deviations for continuous variables. Chi-square or Fisher's exact tests were  
28 performed, as appropriate, to analyze the bivariate relationships between the factors of  
29 interest and the outcome defined as being positive for either infection (GC and/or CT in at  
30 least one site). Odds ratios (OR), 95% confidence intervals (CI), and *P*-values were reported.  
31  
32  
33  
34  
35  
36  
37  
38  
39  
40  
41  
42  
43  
44  
45  
46  
47  
48  
49  
50  
51  
52  
53  
54  
55  
56  
57  
58  
59  
60  
*P*-values less than 0.05 were considered statistically significant.

## RESULTS

1  
2  
3 One hundred six consecutive patients were offered participation in the study before one  
4  
5 hundred were enrolled. One participant was later excluded due to recent treatment of an  
6  
7 asymptomatic rectal CT infection prior to enrollment. Due to scheduling conflicts and  
8  
9 technical difficulties, only 96 urine specimens and 87 rectal/pharyngeal swabs were actually  
10  
11 tested. The cohort (n=99) included 79% who were MSM. The mean age of the cohort was  
12  
13 31 years, and race was reported as Black in 36%, Caucasian in 35%, Hispanic in 15%, and  
14  
15 other in 13%. Sixty-seven percent were unmarried, and 36% had a previous history of STI.  
16  
17 HIV-related characteristics included a mean CD4 count of 609 cells/mm<sup>3</sup>, 43% had an HIV  
18  
19 viral load <48 copies/μL, 51% were receiving antiretroviral therapy, and the mean time since  
20  
21 HIV diagnosis was 63 months. (Table 1)  
22  
23  
24  
25  
26  
27  
28

29  
30 Twenty-four percent of the participants had either GC or CT infection in at least 1 site. The  
31  
32 rectal swab yielded the highest incidence (18.4%), followed by the pharynx (9.2%) and the  
33  
34 urethra (1%). Of rectal swabs, 18% were positive for CT and 3% for GC while for pharynx  
35  
36 swabs, 8% were positive for GC and 2% for CT. Only one infection was detected in a urine  
37  
38 specimen (GC). (Table 2) Eighty-one percent of the identified infections tested positive at  
39  
40 only one site, 19% were positive at two anatomic sites, and none were positive at all three  
41  
42 sites.  
43  
44  
45  
46  
47

48  
49 Using bivariate analysis, the following factors: anal sex (p=0.04), having a male partner (OR  
50  
51 7.02, p=0.04), and having sex at least once weekly (OR 3.28, p=0.04) were associated with  
52  
53 infection; vaginal sex was protective (OR 0.20, p=0.03). Demographic factors associated with  
54  
55 infection included age <35 years (OR 6.27, p=0.02), non-Caucasian ethnicity (Black OR 5.50,  
56  
57 p=0.04; Hispanic OR 11.00, p=0.01; other race OR 7.33, p=0.03), <3 years since HIV  
58  
59 diagnosis (OR 2.75, p=0.04), and previous STI (OR 5.10, p=0.001). (Table 3, 4)  
60

1  
2  
3 Only about half of participants reported consistent use of condoms during anal sex, and less  
4  
5 than half always required their partner to use condoms during anal sex. During oral sex, less  
6  
7 than 15% of participants reported always using condoms and always requiring their partner to  
8  
9 use condoms. (Table 4)  
10  
11

12  
13  
14 With regards to relationship attitudes, 52% of participants reported sexual relations only with  
15  
16 a partner in a serious relationship, while 28% disagreed with this statement. Seventy-six  
17  
18 percent of participants expected monogamy in a serious relationship, while 14% disagreed  
19  
20 with this statement. Twenty-three percent of participants participated in most of their sexual  
21  
22 relations with casual friends and 53% disagreed with this statement. None of these beliefs  
23  
24 were significantly associated with infection. (Table 4)  
25  
26  
27  
28  
29  
30  
31  
32  
33  
34  
35  
36  
37  
38  
39  
40  
41  
42  
43  
44  
45  
46  
47  
48  
49  
50  
51  
52  
53  
54  
55  
56  
57  
58  
59  
60

## DISCUSSION

We found an alarming incidence of GC/CT infection—nearly twice that of non-military MSM in other large California cities.[10] In fact, this may represent an underestimate, since some of our patients likely sought screening (and subsequent therapy) at the local county STD clinic prior to their military encounter, due to fear of discipline or discharge.[26 27] We believe there are two important contributors to the high incidence rates observed: DADT and the first-screen effect.

DADT likely contributed the most to undiagnosed infection. The American Medical Association posited that this military law compromised the medical care of gay patients serving in the military.[28] Prior to repeal, military healthcare providers often believed they could not ask, document, nor counsel about sexual behaviors or orientations for fear of revealing MSM practices of their patients that could lead to adverse legal action for the service member. Therefore, all potential risks would not have been assessed such that screening all three anatomic sites did not occur. DADT likely prevented patients from providing honest answers or reports of sexual practices, for fear of adverse legal action. We started our study prior to the repeal because SECNAVINST 5300.30D (the document that governs management of HIV infection in the Navy and Marine Corps) offered protection against adverse action related to information obtained from a medical or epidemiologic interview. Unfortunately, this provision was not well known to military healthcare providers.

Second, our study facilitated the initiation of sexual risk driven screening for GC/CT infection in our healthcare facility. Hence, study data represent the first time most participants were screened for extragenital GC/CT infection. First-time screening for a condition may reveal more incident cases than subsequent screening, especially in the case of asymptomatic

1 infection, and may partially explain why we detected higher incidence than that found in other  
2 California cities which may represent subsequent screening data.  
3  
4  
5  
6

7 Our study also had several important findings regarding HIV-positive men serving in the US  
8 military. With regards to sexual practices, most respondents were MSM and engaged in oral,  
9 anal (receptive and insertive), and oral-anal sex. As expected, most respondents do not use  
10 condoms during oral sex, but surprisingly nearly half of respondents do not always use  
11 condoms or require their partners to use condoms during anal sex either. Potential  
12 contributors to the low reported rates of condom use include: safer sex fatigue, serosorting,  
13 and seropositioning.[29] Regarding relationship attitudes, about half of respondents believe  
14 sexual relations should only occur with partners in a serious relationship while approximately  
15 one-quarter engage in sex with casual friends. When in a serious relationship, the majority of  
16 respondents expect monogamy.  
17  
18  
19  
20  
21  
22  
23  
24  
25  
26  
27  
28  
29  
30  
31  
32

33 Our study results identified MSM, anal sex, non-Caucasian ethnicity, and younger age were  
34 more associated with GC/CT infections thus recognized as STI risk factors, in agreement with  
35 other studies.[16 30-32] Generally, those patients with a recently acquired HIV infection or  
36 prior history of STI have a higher risk for GC/CT infection. The increased risk among non-  
37 Caucasians may be related to cultural or societal stigma which may prevent an individual  
38 from seeking screening services (and need to disclose self-perceived taboo sexual behavior)  
39 in a way that DADT likely prevented military MSM from seeking or receiving appropriate  
40 screening.  
41  
42  
43  
44  
45  
46  
47  
48  
49  
50  
51  
52  
53  
54

55 We acknowledge potential limitations of our study: those inherent to an observational design,  
56 inability to achieve 100% three site screening from all participants, and small study  
57 population. Although our sample size is small, it is worth noting that trends in our data are  
58  
59  
60

1 similar to trends noted in larger non-military studies of GC/CT infection: most infections were  
2 detected at extragenital sites, the majority of rectal infections were due to CT, and the  
3 majority of pharyngeal infections were due to GC. Finally, although there may have been  
4 some reluctance of participants to answer survey questions honestly, we believe this was  
5 minimized by our confidential survey procedures and as reflected by the candid responses  
6 we did receive.  
7  
8  
9  
10  
11  
12  
13

14  
15  
16 This is the first comprehensive data set of asymptomatic GC/CT infection in a male HIV-  
17 positive US military population. Along with the CDC's recommendations, these results  
18 underscore the need for military healthcare providers to screen their MSM population for  
19 infection at all three anatomic sites. Just as noted in larger studies, we confirm that  
20 urine/urethral screening alone may fail to detect many asymptomatic infections in the MSM  
21 population. Finally, low rates of reported condom use among HIV-positive participants  
22 signals the need to enhance safer sex prevention efforts among MSM.  
23  
24  
25  
26  
27  
28  
29  
30  
31  
32  
33  
34  
35

36 We hope to use the results of this study to help design and complete larger, multisite STI  
37 clinical trials for the US military. We can conclude that MSM make up a significant proportion  
38 of our HIV-infected population. Now that DADT has been repealed and the Department of  
39 Defense has mandated extension of military benefits to same sex partners,[33] we should  
40 look to modify treatment guidelines for MSM in our military to enhance overall health.  
41  
42  
43  
44  
45  
46  
47  
48  
49  
50  
51  
52  
53  
54  
55  
56  
57  
58  
59  
60

## TABLES

Table 1. HIV-infected male demographic characteristics, 2011—San Diego, California (n=99)

| <b>HIV variables</b>                       |             |
|--------------------------------------------|-------------|
| CD4 count mean (SD), cells/mm <sup>3</sup> | 609 (216)   |
| Suppressed HIV VL (<48 copies/μL)          | 43%         |
| Receiving ART                              | 51%         |
| Time since HIV diagnosis mean (SD), months | 62.8 (59.9) |
| <b>Demographic variables</b>               |             |
| Age                                        |             |
| Mean (SD), years                           | 30.9 (8.2)  |
| <25 years                                  | 28%         |
| 25-34 years                                | 38%         |
| ≥ 35 years                                 | 33%         |
| Ethnicity                                  |             |
| Black                                      | 36%         |
| Caucasian                                  | 35%         |
| Hispanic                                   | 15%         |
| Other                                      | 13%         |
| Marital Status                             |             |
| Married                                    | 33%         |
| Single                                     | 67%         |
| Sexual Practice                            |             |
| MSM                                        | 79%         |
| MSW                                        | 21%         |
| Previous STI                               |             |
| Yes                                        | 36%         |

VL = plasma viral load

ART = antiretroviral therapy

MSM = men who have sex with men

MSW = men who have sex with women

SD = standard deviation

STI = sexually transmitted infection

Table 2. Incidence of asymptomatic infection by anatomic site, HIV-infected men, 2011—San Diego, California (n=99)\*

|         | Either Infection |    |                | CT    |    |                | GC    |    |                |
|---------|------------------|----|----------------|-------|----|----------------|-------|----|----------------|
|         | Cases            | N  | Incidence Rate | Cases | N  | Incidence Rate | Cases | N  | Incidence Rate |
| Overall | 20               | 83 | 24.1%          | 17    | 83 | 20.5%          | 8     | 83 | 9.6%           |
| Urethra | 1                | 96 | 1.0%           | 0     | 96 | 0.0%           | 1     | 96 | 1.0%           |
| Rectum  | 16               | 87 | 18.4%          | 16    | 87 | 18.4%          | 3     | 87 | 3.4%           |
| Pharynx | 8                | 87 | 9.2%           | 2     | 87 | 2.3%           | 7     | 87 | 8.0%           |

\*Some participants did not have screening at all three sites.



Table 3. Survey responses – demographic &amp; sexual practices by infection status, HIV-infected men, 2011—San Diego, California

| Demographic variables (N respondents)             | Total |        | CT and/or GC Infection |        | Neither infection |        | OR    | 95% CI      | p value <sup>a</sup> |
|---------------------------------------------------|-------|--------|------------------------|--------|-------------------|--------|-------|-------------|----------------------|
|                                                   | n     | (%)    | n                      | (%)    | n                 | (%)    |       |             |                      |
| <b>Gender of sexual partner(s) (N=98)</b>         |       |        |                        |        |                   |        |       |             |                      |
| Women only                                        | 21    | (21.4) | 1                      | (4.8)  | 20                | (26.0) | REF   | --          | --                   |
| Male (MSM)                                        | 77    | (78.6) | 20                     | (95.2) | 57                | (74.0) | 7.02  | 1.88, 55.72 | 0.04                 |
| <b>Race/ethnicity (N=99)</b>                      |       |        |                        |        |                   |        |       |             |                      |
| White                                             | 35    | (35.4) | 2                      | (9.5)  | 33                | (42.3) | REF   | --          | --                   |
| Black                                             | 36    | (36.4) | 9                      | (42.9) | 27                | (34.7) | 5.50  | 1.10, 27.64 | 0.04                 |
| Hispanic                                          | 15    | (15.2) | 6                      | (28.6) | 9                 | (11.5) | 11.00 | 1.89, 64.06 | 0.01                 |
| Other                                             | 13    | (13.0) | 4                      | (19.0) | 9                 | (11.5) | 7.33  | 1.15, 46.66 | 0.03                 |
| <b>Age (N=99)</b>                                 |       |        |                        |        |                   |        |       |             |                      |
| <35 years                                         | 66    | (66.7) | 19                     | (90.5) | 47                | (60.3) | 6.27  | 1.36, 28.82 | 0.02                 |
| ≥ 35 years                                        | 33    | (33.3) | 2                      | (9.5)  | 31                | (39.7) | REF   | --          | --                   |
| <b>Previous history of STI (N=99)</b>             |       |        |                        |        |                   |        |       |             |                      |
| No                                                | 63    | (63.6) | 7                      | (33.3) | 56                | (71.8) | REF   | --          | --                   |
| Yes                                               | 36    | (36.4) | 14                     | (66.7) | 22                | (28.2) | 5.10  | 1.81, 14.30 | 0.001                |
| <b>Number of years since HIV diagnosis (N=99)</b> |       |        |                        |        |                   |        |       |             |                      |
| > 3 years                                         | 57    | (57.6) | 8                      | (38.1) | 49                | (62.8) | REF   | --          | --                   |
| ≤ 3 years                                         | 42    | (42.4) | 13                     | (61.9) | 29                | (37.2) | 2.75  | 1.02, 7.41  | 0.04                 |
| <b>Sexual practices (N respondents)</b>           |       |        |                        |        |                   |        |       |             |                      |
| <b>Vaginal sex (N=99)</b>                         |       |        |                        |        |                   |        |       |             |                      |
| No                                                | 70    | (70.7) | 19                     | (90.5) | 51                | (65.4) | REF   | --          | --                   |
| Yes                                               | 29    | (29.3) | 2                      | (9.5)  | 27                | (34.6) | 0.20  | 0.04, 0.92  | 0.03                 |
| <b>Oral sex<sup>b</sup> (N=99)</b>                |       |        |                        |        |                   |        |       |             |                      |
| No                                                | 3     | (3.0)  | 0                      | (0)    | 3                 | (3.8)  | REF   | --          | --                   |
| Yes                                               | 96    | (97.0) | 21                     | (100)  | 75                | (96.2) | --    | --          | 1.00                 |
| <b>Anal sex<sup>b</sup> (N=99)</b>                |       |        |                        |        |                   |        |       |             |                      |
| No                                                | 15    | (15.2) | 0                      | (0)    | 15                | (19.2) | REF   | --          | --                   |
| Yes                                               | 84    | (84.8) | 21                     | (100)  | 63                | (80.8) | --    | --          | 0.04                 |
| <b>Insertive anal sex (N=80)</b>                  |       |        |                        |        |                   |        |       |             |                      |
| No                                                | 15    | (18.8) | 5                      | (23.8) | 10                | (16.9) | 1.00  | --          | --                   |
| Yes                                               | 65    | (81.2) | 16                     | (76.2) | 49                | (83.1) | 0.65  | 0.19, 2.20  | 0.52                 |
| <b>Receptive anal sex (N=80)</b>                  |       |        |                        |        |                   |        |       |             |                      |
| No                                                | 17    | (21.3) | 2                      | (9.5)  | 15                | (25.4) | REF   | --          | --                   |
| Yes                                               | 63    | (78.7) | 19                     | (90.5) | 44                | (74.6) | 3.32  | 0.67, 15.57 | 0.21                 |

<sup>a</sup>Fisher's exact test was performed for variables with expected cell frequencies <5, otherwise a Chi-square test was performed.

<sup>b</sup>Odds ratios and 95% confidence intervals not available due to one or more zero cells.

MSM = men who have sex with men (self-reported).

Oral and oral-anal sex were not significantly associated with infection with p>0.05

Table 4. Survey responses – relationship attitudes &amp; condom use by infection status, HIV-infected men, 2011—San Diego, California

|                                                                     | Total |        | CT and/or GC Infection |        | Neither infection |        | OR   | 95% CI      | p value <sup>a</sup> |
|---------------------------------------------------------------------|-------|--------|------------------------|--------|-------------------|--------|------|-------------|----------------------|
|                                                                     | n     | (%)    | n                      | (%)    | n                 | (%)    |      |             |                      |
| <b>Relationship attitudes (N respondents)</b>                       |       |        |                        |        |                   |        |      |             |                      |
| Sexual relationships with >1 partner in the past year (N=99)        |       |        |                        |        |                   |        |      |             |                      |
| No                                                                  | 39    | (39.4) | 5                      | (23.8) | 34                | (43.6) | REF  | --          | --                   |
| Yes                                                                 | 60    | (60.6) | 16                     | (76.2) | 44                | (56.4) | 2.47 | 0.82, 7.42  | 0.10                 |
| Frequency of sexual activity in the past year (N=99)                |       |        |                        |        |                   |        |      |             |                      |
| < Once a week                                                       | 38    | (38.4) | 4                      | (19.0) | 34                | (43.6) | REF  | --          | --                   |
| At least once a week                                                | 61    | (61.6) | 17                     | (81.0) | 44                | (56.4) | 3.28 | 1.01, 10.66 | 0.04                 |
| Sexual relations only with partner in a serious relationship (N=99) |       |        |                        |        |                   |        |      |             |                      |
| Strongly agree                                                      | 51    | (51.5) | 7                      | (33.3) | 44                | (56.4) | REF  | --          | --                   |
| Neither agree/disagree                                              | 20    | (20.2) | 5                      | (23.8) | 15                | (19.2) | 2.10 | 0.59, 7.60  | 0.26                 |
| Strongly disagree                                                   | 28    | (28.3) | 9                      | (42.9) | 19                | (24.4) | 2.98 | 0.97, 9.17  | 0.06                 |
| Expect monogamy in a serious relationship (N=99)                    |       |        |                        |        |                   |        |      |             |                      |
| Strongly agree                                                      | 75    | (75.8) | 14                     | (66.7) | 61                | (78.1) | REF  | --          | --                   |
| Neither agree/disagree                                              | 10    | (10.1) | 3                      | (14.3) | 7                 | (9.0)  | 1.87 | 0.43, 8.14  | 0.41                 |
| Strongly disagree                                                   | 14    | (14.1) | 4                      | (19.0) | 10                | (12.9) | 1.74 | 0.48, 6.38  | 0.40                 |
| Sexual activities mostly with casual friends (N=99)                 |       |        |                        |        |                   |        |      |             |                      |
| Strongly disagree                                                   | 52    | (53.0) | 8                      | (38.0) | 44                | (57.2) | REF  | --          | --                   |
| Neither agree/disagree                                              | 24    | (24.5) | 9                      | (43.0) | 15                | (19.5) | 3.30 | 1.08, 10.10 | 0.04                 |
| Strongly agree                                                      | 22    | (22.5) | 4                      | (19.0) | 18                | (23.3) | 1.22 | 0.33, 4.57  | 0.77                 |
| <b>Condom use (N respondents)</b>                                   |       |        |                        |        |                   |        |      |             |                      |
| Self-condom use during oral sex (N=92)                              |       |        |                        |        |                   |        |      |             |                      |
| Always                                                              | 12    | (13.0) | 4                      | (20.0) | 8                 | (11.1) | REF  | --          | --                   |
| Do not always                                                       | 80    | (87.0) | 16                     | (80.0) | 64                | (88.9) | 0.50 | 0.13, 1.87  | 0.29                 |
| Partner-condom use during oral sex (N=90)                           |       |        |                        |        |                   |        |      |             |                      |
| Always                                                              | 13    | (14.4) | 4                      | (19.0) | 9                 | (13.0) | REF  | --          | --                   |
| Do not always                                                       | 77    | (85.6) | 17                     | (81.0) | 60                | (87.0) | 0.64 | 0.17, 2.34  | 0.49                 |
| Self-condom use during anal sex (N=82)                              |       |        |                        |        |                   |        |      |             |                      |
| Always                                                              | 42    | (51.2) | 9                      | (45.0) | 33                | (53.2) | REF  | --          | --                   |
| Do not always                                                       | 40    | (48.8) | 11                     | (55.0) | 29                | (46.8) | 1.39 | 0.51, 3.83  | 0.52                 |
| Partner-condom use during anal sex (N=80)                           |       |        |                        |        |                   |        |      |             |                      |
| Always                                                              | 37    | (46.2) | 8                      | (38.1) | 29                | (49.2) | REF  | --          | --                   |
| Do not always                                                       | 43    | (53.8) | 13                     | (61.9) | 30                | (50.8) | 1.57 | 0.57, 4.35  | 0.38                 |

<sup>a</sup>Fisher's exact test was performed for variables with expected cell frequencies <5, otherwise a Chi-square test was performed.

<sup>b</sup>Odds ratios and 95% confidence intervals not available due to one or more zero cells.

**LICENSE FOR PUBLICATION STATEMENT**

The Corresponding Author has the right to grant on behalf of all authors and does grant on behalf of all authors, an exclusive license (or non-exclusive for government employees) on a worldwide basis to the BMJ Group and co-owners or contracting owning societies (where published by the BMJ Group on their behalf), and its Licensees to permit this article (if accepted) to be published in Sexually Transmitted Infections and any other BMJ Group products and to exploit all subsidiary rights, as set out in our license.

**CONTRIBUTORSHIP STATEMENT**

Robert J. Carpenter contributed to conception and design, acquisition of data, and analysis and interpretation of data, participated in drafting the article or revising it critically for important intellectual content, and was involved in final approval of the version to be published.

All other authors listed contributed to acquisition of data, participated in drafting the article or revising it critically for important intellectual content, and were involved in final approval of the version to be published.

**DATA SHARING STATEMENT**

No additional data available.

**COMPETING INTERESTS**

None

**FUNDING**

None

## REFERENCES

1. Cohen MS, Hoffman IF, Royce RA, et al. Reduction of concentration of HIV-1 in semen after treatment of urethritis: implications for prevention of sexual transmission of HIV-1. AIDSCAP Malawi Research Group. *Lancet* 1997;**349**(9069):1868-73
2. Galvin SR, Cohen MS. The role of sexually transmitted diseases in HIV transmission. *Nature reviews. Microbiology* 2004;**2**(1):33-42 doi: 10.1038/nrmicro794[published Online First: Epub Date]].
3. Vernazza PL, Eron JJ, Fiscus SA, et al. Sexual transmission of HIV: infectiousness and prevention. *Aids* 1999;**13**(2):155-66
4. Workowski KA, Berman S. Sexually transmitted diseases treatment guidelines, 2010. *MMWR Recomm Rep* 2010;**59**(RR-12):1-110
5. Park J, Marcus JL, Pandori M, et al. Sentinel surveillance for pharyngeal chlamydia and gonorrhoea among men who have sex with men--San Francisco, 2010. *Sexually transmitted diseases* 2012;**39**(6):482-4 doi: 10.1097/OLQ.0b013e3182495e2f[published Online First: Epub Date]].
6. Hoover KW, Butler M, Workowski K, et al. STD screening of HIV-infected MSM in HIV clinics. *Sexually transmitted diseases* 2010;**37**(12):771-6 doi: 10.1097/OLQ.0b013e3181e50058[published Online First: Epub Date]].
7. Schachter J, Moncada J, Liska S, et al. Nucleic acid amplification tests in the diagnosis of chlamydial and gonococcal infections of the oropharynx and rectum in men who have sex with men. *Sexually transmitted diseases* 2008;**35**(7):637-42 doi: 10.1097/OLQ.0b013e31817bdd7e[published Online First: Epub Date]].
8. Rieg G, Lewis RJ, Miller LG, et al. Asymptomatic sexually transmitted infections in HIV-infected men who have sex with men: prevalence, incidence, predictors, and screening strategies. *AIDS patient care and STDs* 2008;**22**(12):947-54 doi: 10.1089/apc.2007.0240[published Online First: Epub Date]].
9. Geisler WM, Whittington WL, Suchland RJ, et al. Epidemiology of anorectal chlamydial and gonococcal infections among men having sex with men in Seattle: utilizing serovar and auxotype strain typing. *Sexually transmitted diseases* 2002;**29**(4):189-95
10. Kent CK, Chaw JK, Wong W, et al. Prevalence of rectal, urethral, and pharyngeal chlamydia and gonorrhoea detected in 2 clinical settings among men who have sex with men: San Francisco, California, 2003. *Clinical infectious diseases : an official publication of the Infectious Diseases Society of America* 2005;**41**(1):67-74 doi: CID35177 [pii]  
10.1086/430704[published Online First: Epub Date]].
11. Burrelli DF. "Don't Ask, Don't Tell": The Law and Military Policy on Same-Sex Behavior. *Secondary "Don't Ask, Don't Tell": The Law and Military Policy on Same-Sex Behavior* 2010.  
<http://www.fas.org/sgp/crs/misc/R40782.pdf>.
12. Miller WC, Zenilman JM. Epidemiology of chlamydial infection, gonorrhoea, and trichomoniasis in the United States--2005. *Infect Dis Clin North Am* 2005;**19**(2):281-96 doi: S0891-5520(05)00032-2 [pii]  
10.1016/j.idc.2005.04.001[published Online First: Epub Date]].
13. Mimiaga MJ, Helms DJ, Reisner SL, et al. Gonococcal, chlamydia, and syphilis infection positivity among MSM attending a large primary care clinic, Boston, 2003 to 2004. *Sexually transmitted diseases* 2009;**36**(8):507-11 doi: 10.1097/OLQ.0b013e3181a2ad98[published Online First: Epub Date]].
14. Phipps W, Stanley H, Kohn R, et al. Syphilis, chlamydia, and gonorrhoea screening in HIV-infected patients in primary care, San Francisco, California, 2003. *AIDS patient care and STDs* 2005;**19**(8):495-8 doi: 10.1089/apc.2005.19.495[published Online First: Epub Date]].

- 1 15. Rietmeijer CA, Patnaik JL, Judson FN, et al. Increases in gonorrhoea and sexual risk behaviors among men  
2 who have sex with men: a 12-year trend analysis at the Denver Metro Health Clinic. Sexually  
3 transmitted diseases 2003;**30**(7):562-7
- 4 16. Spaulding AB, Lifson AR, Iverson ER, et al. Gonorrhoea or chlamydia in a U.S. military HIV-positive cohort.  
5 Sexually transmitted infections 2012;**88**(4):266-71 doi: 10.1136/sextrans-2011-050173[published  
6 Online First: Epub Date] |.
- 7 17. Aldous WK, Robertson JL, Robinson BJ, et al. Rates of gonorrhoea and Chlamydia in U.S. military personnel  
8 deployed to Iraq and Afghanistan (2004-2009). Military medicine 2011;**176**(6):705-10
- 9 18. Brodine SK, Shafer MA, Shaffer RA, et al. Asymptomatic sexually transmitted disease prevalence in four  
10 military populations: application of DNA amplification assays for Chlamydia and gonorrhoea screening.  
11 The Journal of infectious diseases 1998;**178**(4):1202-4
- 12 19. Sena AC, Miller WC, Hoffman IF, et al. Trends of gonorrhoea and chlamydial infection during 1985-1996  
13 among active-duty soldiers at a United States Army installation. Clinical infectious diseases : an official  
14 publication of the Infectious Diseases Society of America 2000;**30**(4):742-8 doi:  
15 10.1086/313742[published Online First: Epub Date] |.
- 16 20. Cecil JA, Howell MR, Tawes JJ, et al. Features of Chlamydia trachomatis and Neisseria gonorrhoeae  
17 infection in male Army recruits. The Journal of infectious diseases 2001;**184**(9):1216-9 doi:  
18 10.1086/323662[published Online First: Epub Date] |.
- 19 21. Zenilman JM, Glass G, Shields T, et al. Geographic epidemiology of gonorrhoea and chlamydia on a large  
20 military installation: application of a GIS system. Sexually transmitted infections 2002;**78**(1):40-4
- 21 22. Shafer MA, Boyer CB, Shaffer RA, et al. Correlates of sexually transmitted diseases in a young male  
22 deployed military population. Military medicine 2002;**167**(6):496-500
- 23 23. Arcari CM, Gaydos JC, Howell MR, et al. Feasibility and short-term impact of linked education and urine  
24 screening interventions for Chlamydia and gonorrhoea in male army recruits. Sexually transmitted  
25 diseases 2004;**31**(7):443-7
- 26 24. Wood BJ, Gaydos JC, McKee KT, Jr., et al. Comparison of the urine Leukocyte Esterase Test to a Nucleic Acid  
27 Amplification Test for screening non-health care-seeking male soldiers for Chlamydia trachomatis and  
28 Neisseria gonorrhoeae infections. Military medicine 2007;**172**(7):770-2
- 29 25. Crum NF, Grillo M, Wallace MR. HIV care in the U.S. Navy: a multidisciplinary approach. Military medicine  
30 2005;**170**(12):1019-25
- 31 26. Katz KA. Health hazards of "don't ask, don't tell". N Engl J Med 2010;**363**(25):2380-1 doi:  
32 10.1056/NEJMp1012496[published Online First: Epub Date] |.
- 33 27. Smith DM. Active duty military personnel presenting for care at a Gay Men's Health Clinic. J Homosex  
34 2008;**54**(3):277-9 doi: 10.1080/00918360801982173[published Online First: Epub Date] |.
- 35 28. O'Reilly KB. AMA meeting: "Don't ask, don't tell" said to hurt patient care; repeal urged. Secondary AMA  
36 meeting: "Don't ask, don't tell" said to hurt patient care; repeal urged 2009. [http://www.ama-  
37 assn.org/amednews/2009/11/23/prsc1123.htm](http://www.ama-assn.org/amednews/2009/11/23/prsc1123.htm).
- 38 29. McFarland W, Chen YH, Nguyen B, et al. Behavior, intention or chance? A longitudinal study of HIV  
39 seroadaptive behaviors, abstinence and condom use. AIDS Behav 2012;**16**(1):121-31 doi:  
40 10.1007/s10461-011-9936-8[published Online First: Epub Date] |.
- 41 30. Mustanski BS, Newcomb ME, Du Bois SN, et al. HIV in young men who have sex with men: a review of  
42 epidemiology, risk and protective factors, and interventions. J Sex Res 2011;**48**(2-3):218-53 doi:  
43 10.1080/00224499.2011.558645[published Online First: Epub Date] |.
- 44 31. Newman LM, Berman SM. Epidemiology of STD disparities in African American communities. Sexually  
45 transmitted diseases 2008;**35**(12 Suppl):S4-12 doi: 10.1097/OLQ.0b013e31818eb90e[published Online  
46 First: Epub Date] |.
- 47 32. Wolitski RJ, Fenton KA. Sexual health, HIV, and sexually transmitted infections among gay, bisexual, and  
48 other men who have sex with men in the United States. AIDS Behav 2011;**15** Suppl 1:S9-17 doi:  
49 10.1007/s10461-011-9901-6[published Online First: Epub Date] |.
- 50 33. Panetta L. Memorandum for Secretaries of the Military Departments Acting Under Secretary of Defense for  
51 Personnel and Readiness. Secondary Memorandum for Secretaries of the Military Departments Acting  
52 Under Secretary of Defense for Personnel and Readiness 2013. [http://www.defense.gov/news/Same-  
53 SexBenefitsMemo.pdf](http://www.defense.gov/news/Same-SexBenefitsMemo.pdf).

1  
2  
3  
4  
5  
6  
7  
8  
9  
10  
11  
12  
13  
14  
15  
16  
17  
18  
19  
20  
21  
22  
23  
24  
25  
26  
27  
28  
29  
30  
31  
32  
33  
34  
35  
36  
37  
38  
39  
40  
41  
42  
43  
44  
45  
46  
47  
48  
49  
50  
51  
52  
53  
54  
55  
56  
57  
58  
59  
60

For peer review only

1  
2  
3  
4  
5  
6  
7  
8  
9  
10  
11  
12  
13  
14  
15  
16  
17  
18  
19  
20  
21  
22  
23  
24  
25  
26  
27  
28  
29  
30  
31  
32  
33  
34  
35  
36  
37  
38  
39  
40  
41  
42  
43  
44  
45  
46  
47  
48  
49  
50  
51  
52  
53  
54  
55  
56  
57  
58  
59  
60

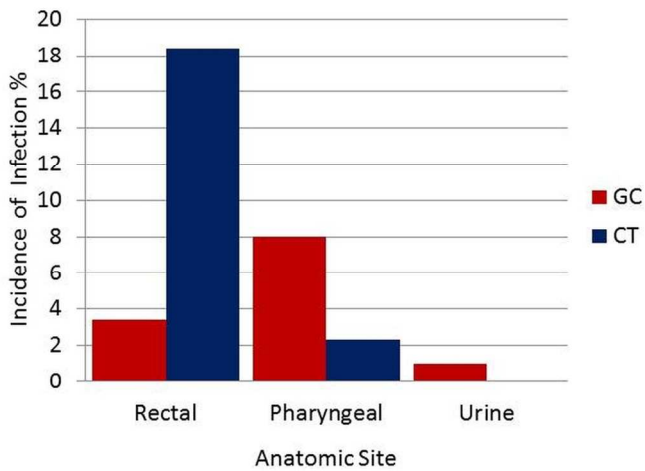

Distribution of asymptomatic gonococcal (GC) and chlamydial (CT) infection among HIV-infected men, San Diego, California, 2011  
119x90mm (300 x 300 DPI)

ew only

**Title: Incidence and Factors Associated with Asymptomatic Gonococcal and Chlamydial Infection among US Navy and Marine Corps Men Infected With the Human Immunodeficiency Virus**

**Running Title: HIV and gonococcal/chlamydial infection in US Navy and Marine Corps men**

**Authors:**

1. Robert J. Carpenter, DO, FACP (**corresponding author**)
  - a. Affiliation: Division of Infectious Diseases, Naval Medical Center San Diego
  - b. Position: Infectious Diseases Staff Physician
  - c. Address: 34800 Bob Wilson Drive, San Diego, CA, 92134
  - d. Phone: 619-532-7475
  - e. Fax: 619-532-7478
  - f. Email: rjc311@gmail.com
2. Oliver N. Refugio, MPH
  - a. Affiliation: Graduate School of Public Health, San Diego State University, San Diego, CA
3. Nehkonti Adams, MD
  - a. Affiliation: Division of Infectious Diseases, Naval Medical Center San Diego, San Diego, CA
4. Kevin P. O'Brien
  - a. Affiliation: Division of Infectious Diseases, Naval Medical Center San Diego, San Diego, CA
5. Mark D. Johnson, MD MTM&H
  - a. Affiliation: Division of Infectious Diseases, Naval Medical Center San Diego, San Diego, CA
6. Harold L. Groff, MD MPH
  - a. Affiliation: Division of Infectious Diseases, Naval Medical Center San Diego, San Diego, CA
7. Ryan C. Maves, MD
  - a. Affiliation: Division of Infectious Diseases, Naval Medical Center San Diego, San Diego, CA
8. Mary F. Bavaro, MD
  - a. Affiliation: Division of Infectious Diseases, Naval Medical Center San Diego, San Diego, CA
9. Nancy F. Crum-Cianflone, MD MPH
  - a. Affiliation: Division of Infectious Diseases, Naval Medical Center San Diego, San Diego, CA; Graduate School of Public Health, San Diego State University, San Diego, CA; Naval Health Research Center, San Diego, CA

**Word Count: 2083**

**Conflict of Interest:** There are no conflicts of interest to report. The authors have received no financial support for this manuscript.

**Key words:** HIV, gonorrhoea, Chlamydia, military, MSM, "don't ask, don't tell", DADT

**Disclosure:** The views expressed in this manuscript are those of the authors and do not necessarily reflect the official policy or position of the Department of the Navy, Department of Defense, nor the U.S. Government.



## ARTICLE SUMMARY

### FOCUS

- Is asymptomatic gonorrhoea and chlamydia infection prevalent among US military men with HIV?
- If so, are those infections associated with any specific sexual practice or relationship beliefs?

### KEY MESSAGES

- Men who have sex with men (MSM) in the US military are at risk for asymptomatic gonorrhoea and chlamydia infection, predominantly at extragenital sites.
- Sex with men, anal sex, non-Caucasian ethnicity, age <35 years, and HIV infection for <3 years were all associated with asymptomatic infection.
- Repeal of DADT fostered a change in US military medical culture, allowing clinicians to counsel and screen MSM according to established guidelines.

### STRENGTHS

- First comprehensive data set of asymptomatic gonorrhoea/chlamydia infection in a male US military population previously infected with HIV
- First study to describe health needs of men who have sex with men in a US military population

### WEAKNESSES

- Observational study
- Small n (pilot study)
- Inability to obtain 3 site anatomic screening from all participants

**ABSTRACT:**

Objectives: *Neisseria gonorrhoeae* (GC) and *Chlamydia trachomatis* (CT) can facilitate transmission of HIV. ~~M and men~~ men who have sex with men (MSM) may harbor infections at genital and extragenital sites. Data regarding extragenital GC and CT infections in military populations are lacking. We examined the incidence and factors associated with asymptomatic GC and CT infection among this category of HIV-infected military personnel.

Methods: Cross-sectional pilot study of asymptomatic men who underwent nucleic acid amplification screening for GC and CT of the pharynx, rectum, and urine at a single military treatment facility in San Diego, CA. Inclusion criteria: male, HIV-infected, Department of Defense beneficiary. Exclusion criteria: any symptom related to urethra, pharynx, or rectum. One participant was also excluded for recent CT treatment. Data on demographics, sexual practices, and HIV variables were collected. Factors associated with infection were analyzed using chi-square tests.

Results: Ninety-nine HIV-positive men were evaluated - 79% MSM, mean age 31 years, 36% Black, and 33% married. Twenty-four percent were infected with either GC or CT. Rectal swabs were positive in 18% for CT and 3% for GC; pharynx swabs were positive in 8% for GC and 2% for CT. Only 1 infection was detected in urine (GC). Anal sex ( $p=0.04$ ), male partner (OR 7.02,  $p=0.04$ ), and sex at least once weekly (OR 3.28,  $p=0.04$ ) were associated with infection. Associated demographic included age <35 years (OR 6.27,  $p=0.02$ ), non-Caucasian ethnicity ( $p=0.03$ ), <3 years since HIV diagnosis (OR 2.75,  $p=0.04$ ), and previous STI (OR 5.10,  $p=0.001$ ).

Conclusions: We found a high incidence of extragenital GC/CT infection among HIV-infected military men. Only one infection was detected in the urine, signaling the need for aggressive three site screening of MSM. Clinicians should be aware of high incidence in order to enhance health through comprehensive STI screening practices.

## INTRODUCTION

*Neisseria gonorrhoeae* (GC) and *Chlamydia trachomatis* (CT) may cause infection in the male urethral, pharyngeal, and rectal mucosa, facilitating transmission of the human immunodeficiency virus (HIV).[1-3] Men who have sex with men (MSM) are at particular risk for harboring these infections at extragenital sites.[4-10] The institution of the United States (US) law, 'don't ask, don't tell' (DADT), allowed gay persons to serve in the military but made it unlawful for a service member to reveal his/her sexual orientation. ~~and was the cause of separation of~~Until its repeal in 2011, nearly 14,000 qualified service members were separated from the military.<sup>[11]</sup> Although there are several published reports regarding GC/CT infections in MSM, limited data existed among US military members.<sup>[7 9 10 12-15]</sup> Since 1986, the US military maintains a natural history study of HIV-infected persons receiving military healthcare and reports of GC/CT infection status in this cohort have been published.<sup>[16]</sup> ~~Additionally, others have reported on~~Several other reports document GC/CT infections in US military men.<sup>[17-24]</sup> However, because of the DADT policy these reports ~~fail to~~could not represent the full spectrum of GC/CT infection in a military MSM population because they only include d data from urine/urethra specimens. Extragenital Presently, extragenital anatomic site data ~~has never been previously captured nor reported by US military studies and, again largely because of DADT and,~~ comprehensive sexual practices and behaviors ~~have also never been previously captured nor~~may now be reported. ~~This dearth of data is largely a byproduct of DADT which prohibited the recognition and study of MSM health needs; the law was repealed in 2011.~~

The Naval Medical Center San Diego (NMCS D) is one of three US Navy HIV Evaluation and Treatment Units and provides health care to approximately 575 HIV-infected Department of Defense beneficiaries, approximately half of whom are currently serving on active military

1  
2  
3  
4  
5  
6  
7  
8  
9  
10  
11  
12  
13  
14  
15  
16  
17  
18  
19  
20  
21  
22  
23  
24  
25  
26  
27  
28  
29  
30  
31  
32  
33  
34  
35  
36  
37  
38  
39  
40  
41  
42  
43  
44  
45  
46  
47  
48  
49  
50  
51  
52  
53  
54  
55  
56  
57  
58  
59  
60

duty. Services offered include comprehensive primary and subspecialty health care, mental health services, prevention counseling and health promotion, and HIV and other sexually transmitted infection (STI) screening and management.[25] However, three anatomic site GC/CT screening was not routinely performed in any US Navy medical treatment facility prior to this study. ~~As US Department of Defense beneficiaries, these patients receive open, unrestricted access to care without copayments.~~

Given the lack of data on asymptomatic GC and CT infection among a US military cohort of HIV-infected men, we conducted a cross-sectional pilot study with the objectives: (1) to describe the incidence of asymptomatic urethral, pharyngeal, and rectal GC/CT infection in this population; (2) to ~~describe~~ identify specific sexual behaviors, relationship attitudes, and HIV disease attributes among this cohort; and (3) to ~~identify~~ determine specific factors associated with asymptomatic GC/CT infections.

## MATERIALS AND METHODS

### Participants and Procedures

All HIV-infected US Navy and Marine Corps members serving on active duty are required to participate in a biannual medical and psychosocial evaluation. Those serving at military bases in the western US and Pacific Basin report to NMCS D for these visits. ~~In order to minimize selection bias, b~~ Beginning in September 2010, we presented the study to each consecutive military member presenting for required HIV evaluation until we enrolled 100 participants. The study was designed as a pilot to guide design of future research. No incentive to participation was offered. Those who participated did so to optimize personal sexual health through more thorough STI screening. Inclusion criteria included: male gender, HIV-infected, receiving care at the NMCS D, and having no current symptoms referable to the pharynx, urethra, or rectum on the day of enrollment. ~~Those who voluntarily agreed to participate~~ Study participants completed a short questionnaire regarding sexual practices and

1 relationship attitudes. In order to encourage honest responses, the written questionnaire was  
2 administered by the clinic's non-military preventive medicine counselor and all responses  
3 were confidentially maintained.  
4  
5  
6  
7  
8

9  
10 Each participant was screened for asymptomatic GC/CT infection of the urethra, pharynx,  
11 and rectum using a first-void urine sample and posterior pharyngeal and rectal swabs  
12 obtained by their primary HIV provider during their routine, biannual HIV clinic visit. All  
13 collected specimens were collected on the day the questionnaire was completed and ~~all~~ any  
14 infections were appropriately treated. The NMCS D laboratory previously ~~verified~~ validated the  
15 APTIMA Combo2<sup>®</sup> Assay (Gen-Probe Inc., San Diego, CA) for ~~use in the testing~~ pharyngeal  
16 and rectal ~~specimens~~ sum according to Clinical Laboratory Improvement Amendments (CLIA)  
17 standard Sec 493.1253s. Medical records were reviewed by an HIV clinician and data  
18 regarding demographics, prior STIs, and HIV-related data were collected. ~~The~~ This study  
19 was previously approved ~~and with a~~ waiver of informed consent ~~was~~ granted by the NMCS D  
20 Institutional Review Board.  
21  
22  
23  
24  
25  
26  
27  
28  
29  
30  
31  
32  
33  
34  
35  
36  
37

### 38 Data Analysis

39  
40 The data collected (laboratory results, questionnaire responses, and medical record  
41 information) were entered into a Microsoft Excel 2003 (Microsoft Corporation, Redmond, WA)  
42 database and analyzed with SAS<sup>®</sup> version 9.2 (SAS Institute, Cary, NC). Incidence rates  
43 were calculated for each type of infection (GC, CT, or both) at each site. The descriptive  
44 statistics included for categorical variables were counts and proportions, and means and  
45 standard deviations for continuous variables. Chi-square or Fisher's exact tests were  
46 performed, as appropriate, to analyze the bivariate relationships between the factors of  
47 interest and the outcome defined as being positive for either infection (GC and/or CT in at  
48  
49  
50  
51  
52  
53  
54  
55  
56  
57  
58  
59  
60

1 least one site). Odds ratios (OR), 95% confidence intervals (CI), and *P*-values were reported.

2  
3 *P*-values less than 0.05 were considered statistically significant.  
4  
5  
6  
7  
8  
9  
10  
11  
12  
13  
14  
15  
16  
17  
18  
19  
20  
21  
22  
23  
24  
25  
26  
27  
28  
29  
30  
31  
32  
33  
34  
35  
36  
37  
38  
39  
40  
41  
42  
43  
44  
45  
46  
47  
48  
49  
50  
51  
52  
53  
54  
55  
56  
57  
58  
59  
60

For peer review only

## RESULTS

One hundred six consecutive patients were offered participation in the study, ~~six declined, and before~~ one hundred were enrolled. One participant was later excluded due to recent treatment of an asymptomatic rectal CT infection prior to enrollment. Due to scheduling conflicts and ~~inability of participant to return to the clinic~~ technical difficulties, only 96 urine specimens and 87 rectal/pharyngeal swabs were actually tested., ~~and despite several attempts to do so, a urine specimen was not collected from 3 participants and rectal/pharyngeal swabs from 12.~~ The cohort (n=99) included 79% who were MSM. The mean age of the cohort was 31 years, and race was reported as Black in 36%, Caucasian in 35%, Hispanic in 15%, and other in 13%. Sixty-seven percent were unmarried, and 36% had a previous history of STI. HIV-related characteristics included a mean CD4 count of 609 cells/mm<sup>3</sup>, 43% had an HIV viral load <48 copies/μL, 51% were receiving antiretroviral therapy, and the mean time since HIV diagnosis was 63 months. (Table 1)

Twenty-four percent of the participants had either GC or CT infection in at least 1 site. The ~~site with the~~ rectal swab yielded the highest incidence ~~was the rectum~~ (18.4%), followed by the pharynx (9.2%) and the urethra (1%). Of rectal swabs, 18% were positive for CT and 3% for GC ~~while for~~. Of pharynx swabs, 8% were positive for GC and 2% for CT. Only one infection was detected in a urine specimen (GC). (Table 2) Eighty-one percent of ~~those with GC/CT~~ the identified infections ~~had a positive screening test~~ tested positive at only one site, 19% were positive at two anatomic sites, and none were positive at all three sites.

~~In~~ Using bivariate analysis, the following factors: anal sex (p=0.04), having a male partner (OR 7.02, p=0.04), and having sex at least once weekly (OR 3.28, p=0.04) were associated with infection; vaginal sex was protective (OR 0.20, p=0.03). Demographic factors associated with infection included age <35 years (OR 6.27, p=0.02), non-Caucasian ethnicity (Black OR

1 5.50, p=0.04; Hispanic OR 11.00, p=0.01; other race OR 7.33, p=0.03), <3 years since HIV  
2 diagnosis (OR 2.75, p=0.04), and previous STI (OR 5.10, p=0.001). (Table 3, 4)  
3  
4  
5  
6

7 Only about half of participants reported ~~always using~~consistent use of condoms during anal  
8 sex, and less than half always required their partner to use condoms during anal sex. During  
9 oral sex, less than 15% of participants reported always using condoms and always requiring  
10 their partner to use condoms. (Table 4)  
11  
12  
13  
14  
15  
16  
17  
18

19 With regards to relationship attitudes, 52% of participants reported sexual relations only with  
20 a partner in a serious relationship, while 28% disagreed with this statement. Seventy-six  
21 percent of participants expected monogamy in a serious relationship, while 14% disagreed  
22 with this statement. Twenty-three percent of participants participated in most of their sexual  
23 relations with casual friends and 53% disagreed with this statement. None of these beliefs  
24 were significantly associated with infection. (Table 4)  
25  
26  
27  
28  
29  
30  
31  
32  
33  
34  
35  
36  
37  
38  
39  
40  
41  
42  
43  
44  
45  
46  
47  
48  
49  
50  
51  
52  
53  
54  
55  
56  
57  
58  
59  
60



## DISCUSSION

We found an alarming incidence of GC/CT infection—nearly twice that of non-military MSM in other large California cities.[10] In fact, ~~our incidence~~this may represent an underestimate, since some of our patients ~~may seek~~likely sought screening (and subsequent therapy) at the local county STD clinic prior to their military encounter, due to fear of discipline or discharge.[26 27] We believe there are two important contributors to the high incidence rates observed: DADT and the first-screen effect.

DADT likely contributed the most to undiagnosed infection. The American Medical Association posited that this military law compromised the medical care of gay patients serving in the military.[28] Prior to repeal, military healthcare providers often believed they could not ask, document, nor counsel about sexual behaviors or orientations for fear of revealing MSM practices of their patients that ~~they believed would~~could lead to adverse legal action for the service member. Therefore, all potential risks would not have been assessed ~~and the need for~~such that screening ~~was unknown and~~all three anatomic sites did not occur.

DADT ~~also likely~~ prevented patients from providing honest answers or reports of sexual practices, ~~again~~ for fear of adverse legal action. We started our study prior to the repeal because SECNAVINST 5300.30D (the document that governs management of HIV infection in the Navy and Marine Corps) offered protection against adverse action related to information obtained from a medical or epidemiologic interview. Unfortunately, this provision was not well known to military healthcare providers.

Second, our study facilitated the initiation of sexual risk driven screening for GC/CT infection in our healthcare facility. Hence, study data represent the first time most participants were screened for extragenital GC/CT infection. First-time screening for a condition may reveal

1 more incident cases than subsequent screening, especially in the case of asymptomatic  
2 infection, and may partially explain why we detected higher incidence than that found in other  
3 California cities which may represent subsequent screening data.  
4  
5  
6  
7  
8

9  
10 Our study also had several important findings regarding HIV-positive men serving in the US  
11 military. With regards to sexual practices, most respondents were MSM and engaged in oral,  
12 anal (receptive and insertive), and oral-anal sex. As expected, most respondents do not use  
13 condoms during oral sex, ~~but sx.~~ Surprisingly ~~though was that~~ nearly half of respondents do  
14 not always use condoms or require their partners to use condoms during anal sex either.  
15 ~~Safer sex fatigue, serosorting, and seropositioning. Potential may be~~ contributors to the low  
16 reported rates of condom use include: safer sex fatigue, serosorting, and seropositioning. [29]  
17  
18  
19  
20  
21  
22  
23  
24  
25

26 Regarding relationship attitudes, about half of respondents believe sexual relations should  
27 only occur with partners in a serious relationship while approximately one-quarter engage in  
28 sex with casual friends. When in a serious relationship, the majority of respondents expect  
29 monogamy.  
30  
31  
32  
33  
34  
35  
36  
37

38 ~~The significant findings noted in our study were not unexpected. Our study results identified~~  
39 MSM, anal sex, non-Caucasian ethnicity, and younger age were more associated with  
40 GC/CT ~~and have been identified as~~ infections thus recognized as STI risk factors, in  
41 agreement with other studies. [16 30-32] ~~Also, it follows that a person who~~ Generally, those  
42 patients with a recently acquired HIV infection or ~~has a prior~~ history of STI ~~would be at~~ have a  
43 higher risk for GC/CT infection. The increased risk among non-Caucasians may be related to  
44 cultural or societal stigma which may prevent an individual from seeking screening services  
45 (and need to disclose self-perceived taboo sexual behavior) in a way that DADT likely  
46 prevented military MSM from seeking or receiving appropriate screening.  
47  
48  
49  
50  
51  
52  
53  
54  
55  
56  
57  
58  
59  
60

1 We acknowledge potential limitations of our study: those inherent to an observational design,  
2 inability to achieve 100% three site screening from all participants, and small study  
3 population. Although our sample size is small, it is worth noting that trends in our data are  
4 similar to trends noted in larger non-military studies of GC/CT infection: most infections were  
5 detected at extragenital sites, the majority of rectal infections were due to CT, and the  
6 majority of pharyngeal infections were due to GC. Finally, although there may have been  
7 some reluctance of participants to answer survey questions honestly, ~~although~~ we believe  
8 this was minimized by our confidential survey procedures and as reflected by the candid  
9 responses we did receive.  
10  
11  
12  
13  
14  
15  
16  
17  
18  
19  
20  
21  
22  
23

24 ~~We have generated~~ This is the first comprehensive data set of asymptomatic GC/CT infection  
25 in a male HIV-positive US military population. ~~Although much of what we have learned was~~  
26 ~~assumed to be true, this is the first systematic description~~ Along with the CDC's  
27 recommendations, these results ~~and~~ underscores the need for military healthcare providers  
28 to screen their MSM population for infection at all three anatomic sites. ~~Also,~~ Just as noted in  
29 larger studies, we ~~found~~ confirm that ~~reliance on~~ urine/urethral screening alone ~~will~~ may fail to  
30 detect ~~the vast majority of many~~ asymptomatic infections in ~~the~~ an MSM population. Finally,  
31 low rates of reported condom use among HIV-positive participants signals the need to  
32 enhance safer sex prevention efforts among MSM.  
33  
34  
35  
36  
37  
38  
39  
40  
41  
42  
43  
44  
45  
46  
47  
48  
49  
50  
51  
52  
53  
54  
55  
56  
57  
58  
59  
60

We hope to use the results of ~~this~~ our pilot study ~~will inform and motivate those who~~ help  
design and complete larger, multisite STI clinical trials for the US military. ~~Although our study~~  
~~was small, w~~ we can conclude that MSM make up a significant proportion of our HIV-infected  
population. Now that DADT has been repealed and ~~US Defense Secretary Panetta~~ the  
Department of Defense has mandated extension of military benefits to same sex

1  
2  
3  
4  
5  
6  
7  
8  
9  
10  
11  
12  
13  
14  
15  
16  
17  
18  
19  
20  
21  
22  
23  
24  
25  
26  
27  
28  
29  
30  
31  
32  
33  
34  
35  
36  
37  
38  
39  
40  
41  
42  
43  
44  
45  
46  
47  
48  
49  
50  
51  
52  
53  
54  
55  
56  
57  
58  
59  
60

partners.<sup>1</sup>[33] ~~Therefore, we believe it's also time to include~~ we should look to modify  
treatment guidelines for MSM in our military ~~research~~ to enhance overall health.

For peer review only

## TABLES

Table 1. HIV-infected male demographic characteristics, 2011—San Diego, California (n=99)

| HIV variables                              |             |
|--------------------------------------------|-------------|
| CD4 count mean (SD), cells/mm <sup>3</sup> | 609 (216)   |
| Suppressed HIV VL (<48 copies/μL)          | 43%         |
| Receiving ART                              | 51%         |
| Time since HIV diagnosis mean (SD), months | 62.8 (59.9) |
| Demographic variables                      |             |
| Age                                        |             |
| Mean (SD), years                           | 30.9 (8.2)  |
| <25 years                                  | 28%         |
| 25-34 years                                | 38%         |
| ≥ 35 years                                 | 33%         |
| Ethnicity                                  |             |
| Black                                      | 36%         |
| Caucasian                                  | 35%         |
| Hispanic                                   | 15%         |
| Other                                      | 13%         |
| Marital Status                             |             |
| Married                                    | 33%         |
| Single                                     | 67%         |
| Sexual Practice                            |             |
| MSM                                        | 79%         |
| MSW                                        | 21%         |
| Previous STI                               |             |
| Yes                                        | 36%         |

VL = plasma viral load

ART = antiretroviral therapy

MSM = men who have sex with men

MSW = men who have sex with women

SD = standard deviation

STI = sexually transmitted infection

Table 2. Prevalence of asymptomatic infection by anatomic site, HIV-infected men, 2011—San Diego, California (n=99)\*

|         | Either Infection |    |            | CT    |    |            | GC    |    |            |
|---------|------------------|----|------------|-------|----|------------|-------|----|------------|
|         | Cases            | N  | Prevalence | Cases | N  | Prevalence | Cases | N  | Prevalence |
|         |                  |    | Rate       |       |    | Rate       |       |    | Rate       |
| Overall | 20               | 83 | 24.1%      | 17    | 83 | 20.5%      | 8     | 83 | 9.6%       |
| Urethra | 1                | 96 | 1.0%       | 0     | 96 | 0.0%       | 1     | 96 | 1.0%       |
| Rectum  | 16               | 87 | 18.4%      | 16    | 87 | 18.4%      | 3     | 87 | 3.4%       |
| Pharynx | 8                | 87 | 9.2%       | 2     | 87 | 2.3%       | 7     | 87 | 8.0%       |

\*Some participants did not have screening at all three sites.

Table 3. Survey responses – demographic &amp; sexual practices by infection status, HIV-infected men, 2011—San Diego, California

|                                              | Total |        | CT and/or GC Infection |        | Neither infection |        | OR    | 95% CI      | p value <sup>a</sup> |
|----------------------------------------------|-------|--------|------------------------|--------|-------------------|--------|-------|-------------|----------------------|
|                                              | n     | (%)    | n                      | (%)    | n                 | (%)    |       |             |                      |
| <b>Demographic variables (N respondents)</b> |       |        |                        |        |                   |        |       |             |                      |
| Gender of sexual partner(s) (N=98)           |       |        |                        |        |                   |        |       |             |                      |
| Women only                                   | 21    | (21.4) | 1                      | (4.8)  | 20                | (26.0) | REF   | --          | --                   |
| Male (MSM)                                   | 77    | (78.6) | 20                     | (95.2) | 57                | (74.0) | 7.02  | 1.88, 55.72 | 0.04                 |
| Race/ethnicity (N=99)                        |       |        |                        |        |                   |        |       |             |                      |
| White                                        | 35    | (35.4) | 2                      | (9.5)  | 33                | (42.3) | REF   | --          | --                   |
| Black                                        | 36    | (36.4) | 9                      | (42.9) | 27                | (34.7) | 5.50  | 1.10, 27.64 | 0.04                 |
| Hispanic                                     | 15    | (15.2) | 6                      | (28.6) | 9                 | (11.5) | 11.00 | 1.89, 64.06 | 0.01                 |
| Other                                        | 13    | (13.0) | 4                      | (19.0) | 9                 | (11.5) | 7.33  | 1.15, 46.66 | 0.03                 |
| Age (N=99)                                   |       |        |                        |        |                   |        |       |             |                      |
| <35 years                                    | 66    | (66.7) | 19                     | (90.5) | 47                | (60.3) | 6.27  | 1.36, 28.82 | 0.02                 |
| ≥ 35 years                                   | 33    | (33.3) | 2                      | (9.5)  | 31                | (39.7) | REF   | --          | --                   |
| Previous history of STI (N=99)               |       |        |                        |        |                   |        |       |             |                      |
| No                                           | 63    | (63.6) | 7                      | (33.3) | 56                | (71.8) | REF   | --          | --                   |
| Yes                                          | 36    | (36.4) | 14                     | (66.7) | 22                | (28.2) | 5.10  | 1.81, 14.30 | 0.001                |
| Number of years since HIV diagnosis (N=99)   |       |        |                        |        |                   |        |       |             |                      |
| > 3 years                                    | 57    | (57.6) | 8                      | (38.1) | 49                | (62.8) | REF   | --          | --                   |
| ≤ 3 years                                    | 42    | (42.4) | 13                     | (61.9) | 29                | (37.2) | 2.75  | 1.02, 7.41  | 0.04                 |
| <b>Sexual practices (N respondents)</b>      |       |        |                        |        |                   |        |       |             |                      |
| Vaginal sex (N=99)                           |       |        |                        |        |                   |        |       |             |                      |
| No                                           | 70    | (70.7) | 19                     | (90.5) | 51                | (65.4) | REF   | --          | --                   |
| Yes                                          | 29    | (29.3) | 2                      | (9.5)  | 27                | (34.6) | 0.20  | 0.04, 0.92  | 0.03                 |
| Oral sex <sup>b</sup> (N=99)                 |       |        |                        |        |                   |        |       |             |                      |
| No                                           | 3     | (3.0)  | 0                      | (0)    | 3                 | (3.8)  | REF   | --          | --                   |
| Yes                                          | 96    | (97.0) | 21                     | (100)  | 75                | (96.2) | --    | --          | 1.00                 |
| Anal sex <sup>b</sup> (N=99)                 |       |        |                        |        |                   |        |       |             |                      |
| No                                           | 15    | (15.2) | 0                      | (0)    | 15                | (19.2) | REF   | --          | --                   |
| Yes                                          | 84    | (84.8) | 21                     | (100)  | 63                | (80.8) | --    | --          | 0.04                 |
| Insertive anal sex (N=80)                    |       |        |                        |        |                   |        |       |             |                      |
| No                                           | 15    | (18.8) | 5                      | (23.8) | 10                | (16.9) | 1.00  | --          | --                   |
| Yes                                          | 65    | (81.2) | 16                     | (76.2) | 49                | (83.1) | 0.65  | 0.19, 2.20  | 0.52                 |
| Receptive anal sex (N=80)                    |       |        |                        |        |                   |        |       |             |                      |
| No                                           | 17    | (21.3) | 2                      | (9.5)  | 15                | (25.4) | REF   | --          | --                   |
| Yes                                          | 63    | (78.7) | 19                     | (90.5) | 44                | (74.6) | 3.32  | 0.67, 15.57 | 0.21                 |

<sup>a</sup>Fisher's exact test was performed for variables with expected cell frequencies <5, otherwise a Chi-square test was performed.

<sup>b</sup>Odds ratios and 95% confidence intervals not available due to one or more zero cells.

MSM = men who have sex with men (self-reported).

Oral and oral-anal sex were not significantly associated with infection with p>0.05

Table 4. Survey responses – relationship attitudes &amp; condom use by infection status, HIV-infected men, 2011—San Diego, California

|                                                                     | Total |        | CT and/or GC Infection |        | Neither infection |        | OR   | 95% CI      | p value <sup>a</sup> |
|---------------------------------------------------------------------|-------|--------|------------------------|--------|-------------------|--------|------|-------------|----------------------|
|                                                                     | n     | (%)    | n                      | (%)    | n                 | (%)    |      |             |                      |
| <b>Relationship attitudes (N respondents)</b>                       |       |        |                        |        |                   |        |      |             |                      |
| Sexual relationships with >1 partner in the past year (N=99)        |       |        |                        |        |                   |        |      |             |                      |
| No                                                                  | 39    | (39.4) | 5                      | (23.8) | 34                | (43.6) | REF  | --          | --                   |
| Yes                                                                 | 60    | (60.6) | 16                     | (76.2) | 44                | (56.4) | 2.47 | 0.82, 7.42  | 0.10                 |
| Frequency of sexual activity in the past year (N=99)                |       |        |                        |        |                   |        |      |             |                      |
| < Once a week                                                       | 38    | (38.4) | 4                      | (19.0) | 34                | (43.6) | REF  | --          | --                   |
| At least once a week                                                | 61    | (61.6) | 17                     | (81.0) | 44                | (56.4) | 3.28 | 1.01, 10.66 | 0.04                 |
| Sexual relations only with partner in a serious relationship (N=99) |       |        |                        |        |                   |        |      |             |                      |
| Strongly agree                                                      | 51    | (51.5) | 7                      | (33.3) | 44                | (56.4) | REF  | --          | --                   |
| Neither agree/disagree                                              | 20    | (20.2) | 5                      | (23.8) | 15                | (19.2) | 2.10 | 0.59, 7.60  | 0.26                 |
| Strongly disagree                                                   | 28    | (28.3) | 9                      | (42.9) | 19                | (24.4) | 2.98 | 0.97, 9.17  | 0.06                 |
| Expect monogamy in a serious relationship (N=99)                    |       |        |                        |        |                   |        |      |             |                      |
| Strongly agree                                                      | 75    | (75.8) | 14                     | (66.7) | 61                | (78.1) | REF  | --          | --                   |
| Neither agree/disagree                                              | 10    | (10.1) | 3                      | (14.3) | 7                 | (9.0)  | 1.87 | 0.43, 8.14  | 0.41                 |
| Strongly disagree                                                   | 14    | (14.1) | 4                      | (19.0) | 10                | (12.9) | 1.74 | 0.48, 6.38  | 0.40                 |
| Sexual activities mostly with casual friends (N=99)                 |       |        |                        |        |                   |        |      |             |                      |
| Strongly disagree                                                   | 52    | (53.0) | 8                      | (38.0) | 44                | (57.2) | REF  | --          | --                   |
| Neither agree/disagree                                              | 24    | (24.5) | 9                      | (43.0) | 15                | (19.5) | 3.30 | 1.08, 10.10 | 0.04                 |
| Strongly agree                                                      | 22    | (22.5) | 4                      | (19.0) | 18                | (23.3) | 1.22 | 0.33, 4.57  | 0.77                 |
| <b>Condom use (N respondents)</b>                                   |       |        |                        |        |                   |        |      |             |                      |
| Self-condom use during oral sex (N=92)                              |       |        |                        |        |                   |        |      |             |                      |
| Always                                                              | 12    | (13.0) | 4                      | (20.0) | 8                 | (11.1) | REF  | --          | --                   |
| Do not always                                                       | 80    | (87.0) | 16                     | (80.0) | 64                | (88.9) | 0.50 | 0.13, 1.87  | 0.29                 |
| Partner-condom use during oral sex (N=90)                           |       |        |                        |        |                   |        |      |             |                      |
| Always                                                              | 13    | (14.4) | 4                      | (19.0) | 9                 | (13.0) | REF  | --          | --                   |
| Do not always                                                       | 77    | (85.6) | 17                     | (81.0) | 60                | (87.0) | 0.64 | 0.17, 2.34  | 0.49                 |
| Self-condom use during anal sex (N=82)                              |       |        |                        |        |                   |        |      |             |                      |
| Always                                                              | 42    | (51.2) | 9                      | (45.0) | 33                | (53.2) | REF  | --          | --                   |
| Do not always                                                       | 40    | (48.8) | 11                     | (55.0) | 29                | (46.8) | 1.39 | 0.51, 3.83  | 0.52                 |
| Partner-condom use during anal sex (N=80)                           |       |        |                        |        |                   |        |      |             |                      |
| Always                                                              | 37    | (46.2) | 8                      | (38.1) | 29                | (49.2) | REF  | --          | --                   |
| Do not always                                                       | 43    | (53.8) | 13                     | (61.9) | 30                | (50.8) | 1.57 | 0.57, 4.35  | 0.38                 |

<sup>a</sup>Fisher's exact test was performed for variables with expected cell frequencies <5, otherwise a Chi-square test was performed.

<sup>b</sup>Odds ratios and 95% confidence intervals not available due to one or more zero cells.

## LICENSE FOR PUBLICATION STATEMENT

The Corresponding Author has the right to grant on behalf of all authors and does grant on behalf of all authors, an exclusive license (or non-exclusive for government employees) on a worldwide basis to the BMJ Group and co-owners or contracting owning societies (where published by the BMJ Group on their behalf), and its Licensees to permit this article (if accepted) to be published in Sexually Transmitted Infections and any other BMJ Group products and to exploit all subsidiary rights, as set out in our license.

## CONTRIBUTORSHIP STATEMENT

Robert J. Carpenter contributed to conception and design, acquisition of data, and analysis and interpretation of data, participated in drafting the article or revising it critically for important intellectual content, and was involved in final approval of the version to be published.

All other authors listed contributed to acquisition of data, participated in drafting the article or revising it critically for important intellectual content, and were involved in final approval of the version to be published.

## DATA SHARING STATEMENT

No additional data available.



## REFERENCES

1. Cohen MS, Hoffman IF, Royce RA, et al. Reduction of concentration of HIV-1 in semen after treatment of urethritis: implications for prevention of sexual transmission of HIV-1. *AIDSCAP Malawi Research Group. Lancet* 1997;**349**(9069):1868-73
2. Galvin SR, Cohen MS. The role of sexually transmitted diseases in HIV transmission. *Nature reviews. Microbiology* 2004;**2**(1):33-42 doi: 10.1038/nrmicro794[published Online First: Epub Date] | .
3. Vernazza PL, Eron JJ, Fiscus SA, Cohen MS. Sexual transmission of HIV: infectiousness and prevention. *Aids* 1999;**13**(2):155-66
4. Workowski KA, Berman S. Sexually transmitted diseases treatment guidelines, 2010. *MMWR Recomm Rep* 2010;**59**(RR-12):1-110
5. Park J, Marcus JL, Pandori M, Snell A, Philip SS, Bernstein KT. Sentinel surveillance for pharyngeal chlamydia and gonorrhea among men who have sex with men--San Francisco, 2010. *Sexually transmitted diseases* 2012;**39**(6):482-4 doi: 10.1097/OLQ.0b013e3182495e2f[published Online First: Epub Date] | .
6. Hoover KW, Butler M, Workowski K, et al. STD screening of HIV-infected MSM in HIV clinics. *Sexually transmitted diseases* 2010;**37**(12):771-6 doi: 10.1097/OLQ.0b013e3181e50058[published Online First: Epub Date] | .
7. Schachter J, Moncada J, Liska S, Shayevich C, Klausner JD. Nucleic acid amplification tests in the diagnosis of chlamydial and gonococcal infections of the oropharynx and rectum in men who have sex with men. *Sexually transmitted diseases* 2008;**35**(7):637-42 doi: 10.1097/OLQ.0b013e31817bdd7e[published Online First: Epub Date] | .
8. Rieg G, Lewis RJ, Miller LG, Witt MD, Guerrero M, Daar ES. Asymptomatic sexually transmitted infections in HIV-infected men who have sex with men: prevalence, incidence, predictors, and screening strategies. *AIDS patient care and STDs* 2008;**22**(12):947-54 doi: 10.1089/apc.2007.0240[published Online First: Epub Date] | .
9. Geisler WM, Whittington WL, Suchland RJ, Stamm WE. Epidemiology of anorectal chlamydial and gonococcal infections among men having sex with men in Seattle: utilizing serovar and auxotype strain typing. *Sexually transmitted diseases* 2002;**29**(4):189-95
10. Kent CK, Chaw JK, Wong W, et al. Prevalence of rectal, urethral, and pharyngeal chlamydia and gonorrhea detected in 2 clinical settings among men who have sex with men: San Francisco, California, 2003. *Clinical infectious diseases : an official publication of the Infectious Diseases Society of America* 2005;**41**(1):67-74 doi: CID35177 [pii] 10.1086/430704[published Online First: Epub Date] | .
11. Burrelli DF. "Don't Ask, Don't Tell": The Law and Military Policy on Same-Sex Behavior. *Secondary "Don't Ask, Don't Tell": The Law and Military Policy on Same-Sex Behavior* 2010. <http://www.fas.org/sgp/crs/misc/R40782.pdf>.
12. Miller WC, Zenilman JM. Epidemiology of chlamydial infection, gonorrhea, and trichomoniasis in the United States--2005. *Infect Dis Clin North Am* 2005;**19**(2):281-96 doi: S0891-5520(05)00032-2 [pii] 10.1016/j.idc.2005.04.001[published Online First: Epub Date] | .
13. Mimiaga MJ, Helms DJ, Reisner SL, et al. Gonococcal, chlamydia, and syphilis infection positivity among MSM attending a large primary care clinic, Boston, 2003 to 2004. *Sexually transmitted diseases* 2009;**36**(8):507-11 doi: 10.1097/OLQ.0b013e3181a2ad98[published Online First: Epub Date] | .
14. Phipps W, Stanley H, Kohn R, Stansell J, Klausner JD. Syphilis, chlamydia, and gonorrhea screening in HIV-infected patients in primary care, San Francisco, California, 2003. *AIDS patient care and STDs* 2005;**19**(8):495-8 doi: 10.1089/apc.2005.19.495[published Online First: Epub Date] | .
15. Rietmeijer CA, Patnaik JL, Judson FN, Douglas JM, Jr. Increases in gonorrhea and sexual risk behaviors among men who have sex with men: a 12-year trend analysis at the Denver Metro Health Clinic. *Sexually transmitted diseases* 2003;**30**(7):562-7
16. Spaulding AB, Lifson AR, Iverson ER, et al. Gonorrhoea or chlamydia in a U.S. military HIV-positive cohort. *Sexually transmitted infections* 2012;**88**(4):266-71 doi: 10.1136/sextrans-2011-050173[published Online First: Epub Date] | .

- 1 17. Aldous WK, Robertson JL, Robinson BJ, et al. Rates of gonorrhoea and Chlamydia in U.S. military personnel  
2 deployed to Iraq and Afghanistan (2004-2009). *Military medicine* 2011;**176**(6):705-10
- 3 18. Brodine SK, Shafer MA, Shaffer RA, et al. Asymptomatic sexually transmitted disease prevalence in four  
4 military populations: application of DNA amplification assays for Chlamydia and gonorrhoea screening.  
5 *The Journal of infectious diseases* 1998;**178**(4):1202-4
- 6 19. Sena AC, Miller WC, Hoffman IF, et al. Trends of gonorrhoea and chlamydial infection during 1985-1996  
7 among active-duty soldiers at a United States Army installation. *Clinical infectious diseases : an official*  
8 *publication of the Infectious Diseases Society of America* 2000;**30**(4):742-8 doi:  
9 10.1086/313742[published Online First: Epub Date]].
- 10 20. Cecil JA, Howell MR, Tawes JJ, et al. Features of Chlamydia trachomatis and Neisseria gonorrhoeae  
11 infection in male Army recruits. *The Journal of infectious diseases* 2001;**184**(9):1216-9 doi:  
12 10.1086/323662[published Online First: Epub Date]].
- 13 21. Zenilman JM, Glass G, Shields T, Jenkins PR, Gaydos JC, McKee KT, Jr. Geographic epidemiology of  
14 gonorrhoea and chlamydia on a large military installation: application of a GIS system. *Sexually*  
15 *transmitted infections* 2002;**78**(1):40-4
- 16 22. Shafer MA, Boyer CB, Shaffer RA, Schachter J, Ito SI, Brodine SK. Correlates of sexually transmitted diseases  
17 in a young male deployed military population. *Military medicine* 2002;**167**(6):496-500
- 18 23. Arcari CM, Gaydos JC, Howell MR, McKee KT, Gaydos CA. Feasibility and short-term impact of linked  
19 education and urine screening interventions for Chlamydia and gonorrhoea in male army recruits.  
20 *Sexually transmitted diseases* 2004;**31**(7):443-7
- 21 24. Wood BJ, Gaydos JC, McKee KT, Jr., Gaydos CA. Comparison of the urine Leukocyte Esterase Test to a  
22 Nucleic Acid Amplification Test for screening non-health care-seeking male soldiers for Chlamydia  
23 trachomatis and Neisseria gonorrhoeae infections. *Military medicine* 2007;**172**(7):770-2
- 24 25. Crum NF, Grillo M, Wallace MR. HIV care in the U.S. Navy: a multidisciplinary approach. *Military medicine*  
25 **2005**;**170**(12):1019-25
- 26 26. Katz KA. Health hazards of "don't ask, don't tell". *N Engl J Med* 2010;**363**(25):2380-1 doi:  
27 10.1056/NEJMp1012496[published Online First: Epub Date]].
- 28 27. Smith DM. Active duty military personnel presenting for care at a Gay Men's Health Clinic. *J Homosex*  
29 **2008**;**54**(3):277-9 doi: 10.1080/00918360801982173[published Online First: Epub Date]].
- 30 28. O'Reilly KB. AMA meeting: "Don't ask, don't tell" said to hurt patient care; repeal urged. *Secondary AMA*  
31 *meeting: "Don't ask, don't tell" said to hurt patient care; repeal urged* 2009. [http://www.ama-](http://www.ama-assn.org/amednews/2009/11/23/prsc1123.htm)  
32 [assn.org/amednews/2009/11/23/prsc1123.htm](http://www.ama-assn.org/amednews/2009/11/23/prsc1123.htm).
- 33 29. McFarland W, Chen YH, Nguyen B, et al. Behavior, intention or chance? A longitudinal study of HIV  
34 seroadaptive behaviors, abstinence and condom use. *AIDS Behav* 2012;**16**(1):121-31 doi:  
35 10.1007/s10461-011-9936-8[published Online First: Epub Date]].
- 36 30. Mustanski BS, Newcomb ME, Du Bois SN, Garcia SC, Grov C. HIV in young men who have sex with men: a  
37 review of epidemiology, risk and protective factors, and interventions. *J Sex Res* 2011;**48**(2-3):218-53  
38 doi: 10.1080/00224499.2011.558645[published Online First: Epub Date]].
- 39 31. Newman LM, Berman SM. Epidemiology of STD disparities in African American communities. *Sexually*  
40 *transmitted diseases* 2008;**35**(12 Suppl):S4-12 doi: 10.1097/OLQ.0b013e31818eb90e[published Online  
41 *First: Epub Date*]].
- 42 32. Wolitski RJ, Fenton KA. Sexual health, HIV, and sexually transmitted infections among gay, bisexual, and  
43 other men who have sex with men in the United States. *AIDS Behav* 2011;**15** Suppl 1:S9-17 doi:  
44 10.1007/s10461-011-9901-6[published Online First: Epub Date]].
- 45 33. Panetta L. Memorandum for Secretaries of the Military Departments Acting Under Secretary of Defense for  
46 Personnel and Readiness. *Secondary Memorandum for Secretaries of the Military Departments Acting*  
47 *Under Secretary of Defense for Personnel and Readiness* 2013. [http://www.defense.gov/news/Same-](http://www.defense.gov/news/Same-SexBenefitsMemo.pdf)  
48 [SexBenefitsMemo.pdf](http://www.defense.gov/news/Same-SexBenefitsMemo.pdf).

STROBE Statement—Checklist of items that should be included in reports of *cohort studies*

|                              | Item No | Recommendation                                                                                                                                                                                                                                                                                                                                                                                                |
|------------------------------|---------|---------------------------------------------------------------------------------------------------------------------------------------------------------------------------------------------------------------------------------------------------------------------------------------------------------------------------------------------------------------------------------------------------------------|
| <b>Title and abstract</b>    | 1       | (a) Indicate the study's design with a commonly used term in the title or the abstract<br>(b) Provide in the abstract an informative and balanced summary of what was done and what was found                                                                                                                                                                                                                 |
| <b>Introduction</b>          |         |                                                                                                                                                                                                                                                                                                                                                                                                               |
| Background/rationale         | 2       | Explain the scientific background and rationale for the investigation being reported                                                                                                                                                                                                                                                                                                                          |
| Objectives                   | 3       | State specific objectives, including any prespecified hypotheses                                                                                                                                                                                                                                                                                                                                              |
| <b>Methods</b>               |         |                                                                                                                                                                                                                                                                                                                                                                                                               |
| Study design                 | 4       | Present key elements of study design early in the paper                                                                                                                                                                                                                                                                                                                                                       |
| Setting                      | 5       | Describe the setting, locations, and relevant dates, including periods of recruitment, exposure, follow-up, and data collection                                                                                                                                                                                                                                                                               |
| Participants                 | 6       | (a) Give the eligibility criteria, and the sources and methods of selection of participants. Describe methods of follow-up<br>(b) For matched studies, give matching criteria and number of exposed and unexposed                                                                                                                                                                                             |
| Variables                    | 7       | Clearly define all outcomes, exposures, predictors, potential confounders, and effect modifiers. Give diagnostic criteria, if applicable                                                                                                                                                                                                                                                                      |
| Data sources/<br>measurement | 8*      | For each variable of interest, give sources of data and details of methods of assessment (measurement). Describe comparability of assessment methods if there is more than one group                                                                                                                                                                                                                          |
| Bias                         | 9       | Describe any efforts to address potential sources of bias                                                                                                                                                                                                                                                                                                                                                     |
| Study size                   | 10      | Explain how the study size was arrived at                                                                                                                                                                                                                                                                                                                                                                     |
| Quantitative variables       | 11      | Explain how quantitative variables were handled in the analyses. If applicable, describe which groupings were chosen and why                                                                                                                                                                                                                                                                                  |
| Statistical methods          | 12      | (a) Describe all statistical methods, including those used to control for confounding<br>(b) Describe any methods used to examine subgroups and interactions<br>(c) Explain how missing data were addressed<br>(d) If applicable, explain how loss to follow-up was addressed<br>(e) Describe any sensitivity analyses                                                                                        |
| <b>Results</b>               |         |                                                                                                                                                                                                                                                                                                                                                                                                               |
| Participants                 | 13*     | (a) Report numbers of individuals at each stage of study—eg numbers potentially eligible, examined for eligibility, confirmed eligible, included in the study, completing follow-up, and analysed<br>(b) Give reasons for non-participation at each stage<br>(c) Consider use of a flow diagram                                                                                                               |
| Descriptive data             | 14*     | (a) Give characteristics of study participants (eg demographic, clinical, social) and information on exposures and potential confounders<br>(b) Indicate number of participants with missing data for each variable of interest<br>(c) Summarise follow-up time (eg, average and total amount)                                                                                                                |
| Outcome data                 | 15*     | Report numbers of outcome events or summary measures over time                                                                                                                                                                                                                                                                                                                                                |
| Main results                 | 16      | (a) Give unadjusted estimates and, if applicable, confounder-adjusted estimates and their precision (eg, 95% confidence interval). Make clear which confounders were adjusted for and why they were included<br>(b) Report category boundaries when continuous variables were categorized<br>(c) If relevant, consider translating estimates of relative risk into absolute risk for a meaningful time period |

|                          |    |                                                                                                                                                                            |
|--------------------------|----|----------------------------------------------------------------------------------------------------------------------------------------------------------------------------|
| Other analyses           | 17 | Report other analyses done—eg analyses of subgroups and interactions, and sensitivity analyses                                                                             |
| <b>Discussion</b>        |    |                                                                                                                                                                            |
| Key results              | 18 | Summarise key results with reference to study objectives                                                                                                                   |
| Limitations              | 19 | Discuss limitations of the study, taking into account sources of potential bias or imprecision. Discuss both direction and magnitude of any potential bias                 |
| Interpretation           | 20 | Give a cautious overall interpretation of results considering objectives, limitations, multiplicity of analyses, results from similar studies, and other relevant evidence |
| Generalisability         | 21 | Discuss the generalisability (external validity) of the study results                                                                                                      |
| <b>Other information</b> |    |                                                                                                                                                                            |
| Funding                  | 22 | Give the source of funding and the role of the funders for the present study and, if applicable, for the original study on which the present article is based              |

\*Give information separately for exposed and unexposed groups.

**Note:** An Explanation and Elaboration article discusses each checklist item and gives methodological background and published examples of transparent reporting. The STROBE checklist is best used in conjunction with this article (freely available on the Web sites of PLoS Medicine at <http://www.plosmedicine.org/>, Annals of Internal Medicine at <http://www.annals.org/>, and Epidemiology at <http://www.epidem.com/>). Information on the STROBE Initiative is available at <http://www.strobe-statement.org>.
